# Supplementary material for: Archie's Law – A reappraisal
Source: Copernicus journal article supplement (doi:10.5194/se-2016-47), 2016-04-05
Supplement: Supplementary file 1 [file SUPPLEMENTARY DATA.xlsx]

## Sheet: Fig1 Data
Reservoir A					Reservoir B					Reservoir C					Reservoir D					Reservoir E		Carbonate			Reservoir F		Carbonate			Reservoir G					Reservoir H					Reservoir I		Carbonate			Reservoir J		Carbonate
Porosity	log1Porosity	F	log10F	m	Porosity	log1Porosity	F	log10F	m	Porosity	log1Porosity	F	log10F	m	Porosity	log1Porosity	F	log10F	m	Porosity	log1Porosity	F	log10F	m	Porosity	log1Porosity	F	log10F	m	Porosity	log1Porosity	F	log10F	m	Porosity	log1Porosity	F	log10F	m	Porosity	log1Porosity	F	log10F	m	Porosity	log1Porosity	F	log10F	m
0.196725	-0.706141	18.5703	1.26882	1.79684	0.0720369	-1.14245	183.784	2.26431	1.98198	0.0946673	-1.0238	96.6214	1.98507	1.93893	0.106636	-0.972097	44.2831	1.64624	1.69349	0.26558	-0.575804	50.2477	1.70112	2.95433	0.186104	-0.730245	44.2144	1.64556	2.25344	0.0616479	-1.21008	116.995	2.06817	1.70911	0.048762	-1.31192	178.072	2.25059	1.7155	0.453092	-0.343814	15.5988	1.19309	3.47017	0.0556716	-1.25437	246.766	2.39229	1.90717
0.17936	-0.746273	13.8581	1.1417	1.52987	0.106245	-0.973692	110.425	2.04307	2.09827	0.112347	-0.949439	65.1682	1.81404	1.91064	0.078235	-1.1066	95.5033	1.98002	1.78928	0.135722	-0.86735	339.768	2.53118	2.91829	0.240519	-0.61885	34.7731	1.54124	2.49049	0.0434518	-1.36199	217.182	2.33682	1.71574	0.0471452	-1.32656	198.756	2.29832	1.73254	0.282826	-0.54848	26.1854	1.41806	2.58543	0.16828	-0.773967	57.7654	1.76167	2.27615
0.114364	-0.941712	50.9555	1.70719	1.81286	0.0823851	-1.08415	152.6	2.18355	2.01407	0.104841	-0.979469	75.8382	1.87989	1.91929	0.0639525	-1.19414	93.5679	1.97113	1.65066	0.201896	-0.694872	109.309	2.03866	2.93386	0.128507	-0.891073	164.43	2.21598	2.48687	0.0397937	-1.40019	194.667	2.28929	1.63499	0.112065	-0.950528	58.2763	1.76549	1.85738	0.205531	-0.687124	59.2995	1.77305	2.5804	0.116779	-0.932636	70.1964	1.84632	1.97967
0.16802	-0.774639	17.3679	1.23975	1.60042	0.071505	-1.14566	200.786	2.30273	2.00995	0.101523	-0.993436	98.8532	1.99499	2.00817	0.0584747	-1.23303	111.198	2.0461	1.6594	0.153623	-0.813545	172.816	2.23758	2.75041	0.151062	-0.820845	99.9719	1.99988	2.43637	0.04836	-1.31551	153.328	2.18562	1.66142	0.0432657	-1.36386	234.314	2.3698	1.73757	0.152696	-0.816172	237.988	2.37655	2.91183	0.125132	-0.902631	77.9858	1.89202	2.09611
0.152409	-0.81699	23.5932	1.37279	1.6803	0.075806	-1.1203	222.612	2.34755	2.09547	0.0633528	-1.19823	206.241	2.31438	1.93149	0.0743399	-1.12878	77.1466	1.88732	1.672	0.170026	-0.769484	158.653	2.20045	2.85964	0.200934	-0.696947	42.9924	1.63339	2.34364	0.0801391	-1.09616	87.7459	1.94323	1.77277	0.0841784	-1.0748	44.0862	1.6443	1.52987	0.255979	-0.591795	32.0947	1.50643	2.54553	0.116919	-0.932116	51.7618	1.71401	1.83884
0.179849	-0.745092	23.3079	1.3675	1.83535	0.0751868	-1.12386	191.965	2.28322	2.03159	0.0830881	-1.08046	133.754	2.12631	1.96796	0.0656634	-1.18268	95.8288	1.9815	1.67543	0.174905	-0.757199	193.522	2.28673	3.01999	0.160458	-0.794639	270.202	2.43169	3.06012	0.0502689	-1.2987	132.095	2.12089	1.63308	0.0395072	-1.40332	202.918	2.30732	1.64418	0.178459	-0.74846	112.62	2.05162	2.74111	0.110982	-0.954749	84.9349	1.92909	2.02052
0.169304	-0.771333	18.2715	1.26177	1.63584	0.0822733	-1.08474	179.516	2.2541	2.07801	0.101626	-0.992996	89.2444	1.95058	1.96434	0.0512235	-1.29053	96.5251	1.98464	1.53785	0.203808	-0.690779	82.644	1.91721	2.77544	0.319107	-0.496064	37.2972	1.57168	3.16829	0.0787199	-1.10392	58.2995	1.76566	1.59946	0.0909535	-1.04118	111.165	2.04597	1.96504	0.176131	-0.754165	105.416	2.02291	2.68231	0.214452	-0.66867	12.903	1.11069	1.66104
0.139234	-0.856255	29.6709	1.47233	1.7195	0.0582442	-1.23475	284.523	2.45412	1.98755	0.0681851	-1.16631	154.08	2.18775	1.87578	0.0817012	-1.08777	68.608	1.83637	1.6882	0.171992	-0.764492	163.914	2.21462	2.89685	0.200868	-0.697088	44.5233	1.64859	2.36496	0.0957674	-1.01878	30.4365	1.48339	1.45605	0.0583752	-1.23377	166.213	2.22067	1.7999	0.205458	-0.687277	118.936	2.07531	3.01962	0.172734	-0.762621	33.3146	1.52264	1.99658
0.16884	-0.772524	25.4333	1.4054	1.81924	0.0512787	-1.29006	489.295	2.68957	2.08484	0.0654852	-1.18386	226.934	2.3559	1.99002	0.0613519	-1.21217	104.207	2.0179	1.6647	0.19325	-0.713881	78.2483	1.89347	2.65237	0.150841	-0.821479	125.49	2.09861	2.55467	0.068235	-1.16599	103.079	2.01317	1.72657	0.0953235	-1.0208	70.4619	1.84795	1.8103	0.221782	-0.654074	58.3698	1.76619	2.70029	0.196662	-0.70628	35.2884	1.54763	2.19125
0.149709	-0.824752	33.3745	1.52341	1.84712	0.0697285	-1.15659	200.588	2.3023	1.9906	0.0595424	-1.22517	230.586	2.36283	1.92857	0.120553	-0.918821	31.3777	1.49662	1.62885	0.159225	-0.797987	113.189	2.0538	2.57373	0.111248	-0.953706	226.267	2.35462	2.46892	0.0571318	-1.24312	226.712	2.35547	1.89481	0.0389944	-1.409	208.615	2.31934	1.6461	0.180014	-0.744694	150.138	2.17649	2.92267	0.151963	-0.818263	50.2155	1.70084	2.0786
0.120744	-0.918133	50.9076	1.70678	1.85897	0.0814199	-1.08927	213.291	2.32897	2.1381	0.104822	-0.979549	72.7552	1.86186	1.90074	0.0858249	-1.06639	63.4815	1.80265	1.69043	0.114787	-0.940108	501.65	2.7004	2.87244	0.247726	-0.606028	30.9002	1.48996	2.45857	0.0486307	-1.31309	120.992	2.08276	1.58615	0.0495295	-1.30514	160.449	2.20534	1.68974	0.186687	-0.728887	206.158	2.3142	3.17498	0.0989931	-1.00439	104.478	2.01903	2.01019
0.134345	-0.871777	36.0312	1.55668	1.78564	0.103552	-0.98484	93.092	1.96891	1.99922	0.127628	-0.894054	52.4458	1.71971	1.9235	0.122957	-0.910248	41.7131	1.62027	1.78003	0.171868	-0.764804	133.709	2.12616	2.78001	0.221723	-0.65419	59.5767	1.77508	2.7134	0.0578757	-1.2375	173.701	2.2398	1.80994	0.055298	-1.25729	132.73	2.12297	1.68853	0.180816	-0.742764	181.305	2.25841	3.04055	0.0526519	-1.27859	316.23	2.5	1.95529
0.0847378	-1.07192	58.3139	1.76577	1.64729	0.0892192	-1.04954	179.833	2.25487	2.14843	0.0808917	-1.0921	134.859	2.12988	1.95027	0.126101	-0.899281	28.4878	1.45466	1.61758	0.135932	-0.86668	323.173	2.50943	2.89546	0.139185	-0.856408	128.994	2.11057	2.46444	0.0525526	-1.27941	148.088	2.17052	1.69651	0.0906751	-1.04251	80.1183	1.90373	1.8261	0.23635	-0.626444	46.027	1.66301	2.65469	0.103086	-0.986799	71.2906	1.85303	1.87782
0.115258	-0.938328	43.1397	1.63488	1.74233	0.130477	-0.884465	59.1461	1.77193	2.00339	0.0785324	-1.10495	134.191	2.12772	1.92563	0.0509585	-1.29278	179.625	2.25437	1.74381	0.216416	-0.664712	68.4189	1.83518	2.76086	0.178545	-0.748252	78.5437	1.89511	2.53272	0.105355	-0.977346	41.768	1.62084	1.65841	0.0683491	-1.16527	78.1584	1.89298	1.6245	0.271259	-0.566617	54.3881	1.7355	3.06293	0.0854581	-1.06825	85.0172	1.92951	1.80624
0.140924	-0.851014	27.3232	1.43653	1.68802	0.0525247	-1.27964	602.097	2.77967	2.17223	0.0766236	-1.11564	153.147	2.18511	1.95862	0.0692349	-1.15968	107.702	2.03222	1.75241	0.12866	-0.890558	312.653	2.49506	2.80168	0.268056	-0.571775	35.8301	1.55425	2.71829	0.113335	-0.945635	42.4586	1.62797	1.72156	0.100532	-0.997697	44.2098	1.64552	1.64932	0.0960216	-1.01763	912.414	2.96019	2.9089	0.0713672	-1.1465	79.9887	1.90303	1.65986
0.161925	-0.790687	17.1599	1.23452	1.56132	0.0724999	-1.13966	228.057	2.35804	2.06907	0.123939	-0.906791	47.5768	1.6774	1.84981	0.128698	-0.890427	33.7009	1.52764	1.71563	0.156355	-0.805888	147.047	2.16746	2.68953	0.223135	-0.651433	78.3135	1.89384	2.90718	0.0869479	-1.06074	56.5943	1.75277	1.6524	0.0556377	-1.25463	116.898	2.06781	1.64814	0.134976	-0.869744	275.215	2.43967	2.80505	0.0792627	-1.10093	126.896	2.10345	1.91061
0.119409	-0.922962	38.2536	1.58267	1.71477	0.0584236	-1.23341	243.176	2.38592	1.93441	0.0987449	-1.00549	90.5528	1.9569	1.94623	0.113775	-0.943954	36.5665	1.56308	1.65589	0.227899	-0.642257	73.6332	1.86707	2.90705	0.174047	-0.759333	83.066	1.91942	2.52777	0.071064	-1.14835	114.669	2.05944	1.79339	0.03647	-1.43806	353.098	2.5479	1.77175	0.238292	-0.622891	59.471	1.77431	2.8485	0.0426291	-1.37029	356.271	2.55178	1.86221
0.162539	-0.789042	20.9292	1.32075	1.67387	0.0906213	-1.04277	123.784	2.09267	2.00683	0.0923028	-1.03479	103.65	2.01557	1.94781	0.0828367	-1.08178	60.0676	1.77864	1.64418	0.125399	-0.901707	520.064	2.71606	3.01213	0.234373	-0.630092	43.9738	1.64319	2.60786	0.0704558	-1.15208	70.704	1.84944	1.6053	0.0391835	-1.4069	247.963	2.39439	1.70189	0.172587	-0.762991	82.7684	1.91786	2.51361	0.183805	-0.735642	27.9532	1.44643	1.96622
0.145864	-0.836053	24.881	1.39587	1.66959	0.0797083	-1.0985	148.632	2.17211	1.97735	0.0820222	-1.08607	135.221	2.13105	1.96216	0.0769754	-1.11365	57.0571	1.75631	1.57708	0.181924	-0.740111	78.8294	1.89669	2.56271	0.12958	-0.887463	89.6391	1.9525	2.20009	0.0685457	-1.16402	161.433	2.20799	1.89687	0.0678173	-1.16866	126.344	2.10155	1.79826	0.158971	-0.798683	262.165	2.41858	3.0282	0.0658429	-1.18149	201.234	2.3037	1.94983
0.128066	-0.892565	31.0512	1.49208	1.67168	0.0675722	-1.17023	266.602	2.42586	2.07298	0.0671236	-1.17313	206.796	2.31554	1.97382	0.0731779	-1.13562	88.0105	1.94453	1.71231	0.204637	-0.689016	90.5421	1.95685	2.84006	0.174127	-0.759134	152.975	2.18462	2.87778	0.0373619	-1.42757	296.634	2.47222	1.73177	0.0765812	-1.11588	80.7239	1.907	1.70897	0.204691	-0.6889	117.556	2.07025	3.00514	0.0419173	-1.37761	543.37	2.7351	1.9854
0.0998566	-1.00062	46.5717	1.66812	1.66708	0.113149	-0.946348	111.527	2.04738	2.16346	0.0872121	-1.05942	95.9237	1.98193	1.87076	0.0787536	-1.10373	60.6397	1.78276	1.61521	0.121471	-0.915526	431.572	2.63505	2.87819	0.215685	-0.666181	85.6366	1.93266	2.9011	0.056489	-1.24804	82.3669	1.91575	1.53501	0.0492943	-1.3072	147.394	2.16848	1.65887	0.274029	-0.562203	19.6589	1.29356	2.30087	0.124553	-0.904647	48.5569	1.68625	1.86399
0.156637	-0.805105	21.2431	1.32722	1.6485	0.0678631	-1.16837	227.609	2.35719	2.01751	0.09316	-1.03077	89.076	1.94976	1.89156	0.105629	-0.976219	54.2671	1.73454	1.77679	0.195382	-0.709116	77.426	1.88889	2.66372	0.136514	-0.864821	147.137	2.16772	2.50656	0.0701374	-1.15405	44.9055	1.6523	1.43174	0.0318525	-1.49686	313.411	2.49611	1.66757	0.261077	-0.583231	29.4246	1.46871	2.51823	0.0511888	-1.29082	210.301	2.32284	1.7995
0.176587	-0.753042	18.1144	1.25802	1.67059	0.0778139	-1.10894	138.714	2.14212	1.93168	0.0749575	-1.12519	156.769	2.19526	1.95102	0.119695	-0.921923	30.6352	1.48622	1.61209	0.1774	-0.751047	263.516	2.42081	3.22324	0.218142	-0.66126	33.8452	1.5295	2.313	0.0849122	-1.07103	54.7262	1.7382	1.62292	0.0489013	-1.31068	169.702	2.22969	1.70117	0.208082	-0.681765	85.9908	1.93445	2.83742	0.305864	-0.514472	5.79131	0.762777	1.48264
0.173829	-0.759878	14.5371	1.16248	1.52982	0.0766359	-1.11557	152.923	2.18447	1.95817	0.0796371	-1.09888	141.244	2.14997	1.9565	0.0461042	-1.33626	150.73	2.1782	1.63007	0.165516	-0.78116	143.658	2.15733	2.7617	0.149575	-0.82514	102.942	2.01259	2.43909	0.0506867	-1.29511	164.821	2.21701	1.71184	0.0560652	-1.25131	128.776	2.10984	1.68611	0.216198	-0.665147	57.5368	1.75995	2.64595	0.0407466	-1.38991	424.851	2.62824	1.89094
0.0754583	-1.12229	57.0156	1.75599	1.56465	0.100828	-0.99642	94.1118	1.97364	1.98073	0.0884782	-1.05316	120.264	2.08014	1.97513	0.107611	-0.968145	34.1943	1.53395	1.58443	0.185943	-0.730621	116.32	2.06566	2.82726	0.196193	-0.707316	26.6873	1.42631	2.0165	0.0734333	-1.13411	145.258	2.16214	1.90647	0.0399769	-1.39819	377.01	2.57635	1.84263	0.208454	-0.68099	76.8536	1.88566	2.76901	0.178165	-0.749179	29.9155	1.4759	1.97002
0.13079	-0.883426	38.7715	1.58851	1.79813	0.0886539	-1.0523	146.483	2.16579	2.05814	0.0830187	-1.08082	139.024	2.14309	1.98283	0.0928733	-1.03211	64.1244	1.80702	1.75081	0.228695	-0.640743	82.1666	1.9147	2.98824	0.222352	-0.65296	47.8664	1.68003	2.57295	0.0683753	-1.1651	130.713	2.11632	1.81643	0.0729453	-1.137	47.2554	1.67445	1.47269	0.25422	-0.59479	48.1115	1.68225	2.82831	0.0896136	-1.04763	111.351	2.04669	1.95365
0.116056	-0.935333	48.5175	1.6859	1.80246	0.0839717	-1.07587	160.907	2.20657	2.05097	0.0612794	-1.21269	223.862	2.34998	1.93783	0.0711034	-1.14811	93.4259	1.97047	1.71627	0.142576	-0.845953	204.149	2.30995	2.73059	0.189943	-0.721377	88.0185	1.94457	2.69564	0.0863088	-1.06394	57.6777	1.76101	1.65517	0.082797	-1.08199	81.8185	1.91285	1.76791	0.222042	-0.653565	63.6037	1.80348	2.75945	0.0779944	-1.10794	139.075	2.14325	1.93445
0.110446	-0.95685	46.7417	1.6697	1.745	0.0803728	-1.09489	176.293	2.24623	2.05156	0.0994329	-1.00247	103.201	2.01369	2.00872	0.0903637	-1.04401	46.9095	1.67126	1.60082	0.209726	-0.678347	85.0707	1.92978	2.84483	0.206748	-0.684559	60.4776	1.78159	2.60254	0.0501495	-1.29973	138.553	2.14162	1.64773	0.0743494	-1.12872	82.5493	1.91671	1.69813	0.211045	-0.675626	118.731	2.07456	3.07058	0.146877	-0.833047	53.2791	1.72656	2.07258
0.139259	-0.856176	35.2943	1.5477	1.80769	0.0799732	-1.09706	161.411	2.20793	2.0126	0.0867198	-1.06188	115.566	2.06283	1.94262	0.120144	-0.920299	35.2161	1.54674	1.68069	0.147201	-0.832088	207.826	2.3177	2.7854	0.208087	-0.681755	60.8007	1.78391	2.61664	0.0497597	-1.30312	196.084	2.29244	1.75919	0.0632876	-1.19868	131.68	2.11952	1.76821	0.158311	-0.80049	85.8397	1.93369	2.41563	0.0594398	-1.22592	188.017	2.2742	1.85509
0.15542	-0.808492	25.3047	1.4032	1.73558	0.0712367	-1.1473	189.12	2.27674	1.98444	0.0783596	-1.10591	165.497	2.21879	2.00631	0.0729718	-1.13685	73.0029	1.86334	1.63904	0.139374	-0.855817	256.096	2.4084	2.81416	0.237781	-0.623824	32.7198	1.51481	2.42827	0.0669945	-1.17396	64.2219	1.80768	1.53982	0.0860423	-1.06529	43.408	1.63757	1.53721	0.203193	-0.692091	123.37	2.09121	3.02158	0.0661178	-1.17968	183.006	2.26247	1.91786
0.129885	-0.886441	28.0841	1.44846	1.63402	0.0468725	-1.32908	479.732	2.681	2.01718	0.077035	-1.11331	127.823	2.10661	1.8922	0.0736331	-1.13293	67.4118	1.82874	1.61417	0.155991	-0.806901	135.177	2.1309	2.64085	0.186411	-0.729528	79.4268	1.89997	2.60438	0.040426	-1.39334	178.984	2.25281	1.61685	0.086301	-1.06398	100.372	2.00161	1.88125	0.441176	-0.355388	7.3904	0.868668	2.44428	0.099738	-1.00114	97.7097	1.98994	1.98767
0.179939	-0.744874	17.0294	1.2312	1.6529	0.0428705	-1.36784	665.663	2.82325	2.06402	0.0729303	-1.13709	179.003	2.25286	1.98125	0.0671104	-1.17321	79.3809	1.89972	1.61925	0.451531	-0.345313	13.7678	1.13886	3.29807	0.174477	-0.758263	109.196	2.03821	2.688	0.0631578	-1.19957	172.266	2.2362	1.86416	0.0685107	-1.16424	101.777	2.00765	1.72443	0.166045	-0.779773	197.438	2.29543	2.94372	0.173417	-0.760907	30.2968	1.4814	1.94688
0.116343	-0.93426	41.1476	1.61434	1.72794	0.0601524	-1.22075	262.581	2.41926	1.98179	0.0546228	-1.26263	299.762	2.47678	1.96161	0.0780031	-1.10789	78.3445	1.89401	1.70957	0.15686	-0.804487	193.262	2.28615	2.84174	0.230799	-0.636766	32.9016	1.51722	2.38269	0.0593148	-1.22684	181.703	2.25936	1.84162	0.0661841	-1.17925	79.1077	1.89822	1.60969	0.229677	-0.638883	42.8562	1.63201	2.55448	0.146684	-0.833617	36.9109	1.56715	1.87995
0.123084	-0.909798	35.9179	1.55531	1.70951	0.0698327	-1.15594	238.163	2.37687	2.05622	0.0731251	-1.13593	180.634	2.2568	1.98674	0.0720651	-1.14228	92.3181	1.96529	1.7205	0.201633	-0.695438	96.1882	1.98312	2.85162	0.225337	-0.647167	39.3775	1.59525	2.46497	0.0506461	-1.29545	201.809	2.30494	1.77925	0.0766321	-1.11559	80.7448	1.90711	1.70951	0.350399	-0.455437	30.3425	1.48205	3.25413	0.146518	-0.834109	29.2078	1.4655	1.75696
0.0812738	-1.09005	56.5857	1.75271	1.60791	0.0848195	-1.0715	157.227	2.19653	2.04995	0.0757896	-1.12039	151.735	2.18109	1.94672	0.0856727	-1.06716	63.047	1.79966	1.68641	0.160405	-0.794781	199.803	2.3006	2.89463	0.281085	-0.551163	26.594	1.42478	2.58505	0.0551658	-1.25833	161.858	2.20913	1.75561	0.0629729	-1.20085	105.108	2.02164	1.68351	0.285021	-0.545123	33.5157	1.52525	2.79799	0.102035	-0.99125	79.1084	1.89822	1.91498
0.174811	-0.757432	14.6299	1.16524	1.53841	0.10911	-0.962134	106.193	2.0261	2.10584	0.0842801	-1.07428	127.592	2.10582	1.96023	0.0854462	-1.06831	60.2704	1.7801	1.66628	0.258282	-0.587906	68.6965	1.83693	3.12454	0.187794	-0.726317	77.8402	1.8912	2.60383	0.0610399	-1.21439	87.157	1.9403	1.59776	0.0556255	-1.25473	95.1893	1.97859	1.57691	0.245593	-0.609785	59.18	1.77217	2.90623	0.107329	-0.969283	71.9631	1.85711	1.91596
0.0878928	-1.05605	58.0435	1.76375	1.67015	0.0676872	-1.16949	284.159	2.45356	2.09797	0.0926106	-1.03334	100.775	2.00335	1.93872	0.150604	-0.822162	36.0302	1.55667	1.89338	0.152282	-0.81735	147.845	2.16981	2.65468	0.115447	-0.937617	340.047	2.53154	2.69997	0.0571403	-1.24306	134.679	2.1293	1.71295	0.108329	-0.965256	44.5517	1.64886	1.70821	0.239234	-0.621176	56.1132	1.74906	2.81573	0.111151	-0.954085	63.8912	1.80544	1.89233
0.101017	-0.995606	50.8484	1.70628	1.71381	0.0636422	-1.19625	313.562	2.49632	2.08678	0.0977334	-1.00996	93.6545	1.97153	1.95209	0.0526033	-1.27899	106.9	2.02898	1.58639	0.1473	-0.831799	269.549	2.43064	2.92215	0.194814	-0.710379	95.9592	1.98209	2.79018	0.0447525	-1.34918	118.306	2.07301	1.53649	0.05189	-1.28492	112.942	2.05286	1.59766	0.215909	-0.665729	99.0707	1.99595	2.99813	0.116781	-0.932627	74.925	1.87463	2.01005
0.128297	-0.891782	22.9364	1.36052	1.52562	0.116775	-0.932651	85.247	1.93068	2.0701	0.081394	-1.08941	130.218	2.11467	1.94112	0.0734818	-1.13382	86.0783	1.93489	1.70653	0.167776	-0.775271	138.36	2.14101	2.76163	0.235965	-0.627153	31.5342	1.49878	2.38982	0.137101	-0.86296	35.7239	1.55296	1.79957	0.106606	-0.972219	50.7455	1.7054	1.75413	0.126762	-0.89701	236.736	2.37426	2.64686	0.0886117	-1.05251	134.676	2.12929	2.02306
0.109118	-0.962102	44.7365	1.65066	1.71568	0.0937361	-1.02809	166.458	2.2213	2.16061	0.0701654	-1.15388	181.106	2.25793	1.95682	0.0746321	-1.12707	113.008	2.05311	1.82163	0.182135	-0.739607	119.627	2.07783	2.80937	0.215441	-0.666672	29.5296	1.47026	2.20537	0.0863467	-1.06375	67.9022	1.83188	1.72209	0.0933121	-1.03006	46.9804	1.67192	1.62312	0.255689	-0.592288	61.1018	1.78605	3.01551	0.137373	-0.862099	47.6936	1.67846	1.94695
0.245729	-0.609544	10.2814	1.01205	1.66034	0.0699665	-1.15511	211.991	2.32632	2.01394	0.0812623	-1.09011	167.778	2.22474	2.04083	0.104541	-0.980713	33.7144	1.52782	1.55786	0.271359	-0.566456	69.361	1.84112	3.25024	0.18444	-0.734144	81.425	1.91076	2.6027	0.05266	-1.27852	88.8641	1.94873	1.52421	0.0474145	-1.32409	184.443	2.26586	1.71126	0.198161	-0.702983	97.2546	1.98791	2.82782	0.0959475	-1.01797	91.6416	1.96209	1.92746
0.0961381	-1.0171	63.5858	1.80336	1.77303	0.0751243	-1.12422	223.151	2.3486	2.08909	0.109023	-0.962483	77.0987	1.88705	1.9606	0.08158	-1.08842	58.5525	1.76755	1.62396	0.184202	-0.734705	109.748	2.0404	2.77717	0.145144	-0.8382	91.8659	1.96315	2.34211	0.10418	-0.982217	75.9087	1.88029	1.91433	0.0615594	-1.21071	201.961	2.30527	1.90407	0.237194	-0.624897	44.3554	1.64695	2.63555	0.0635766	-1.1967	135.735	2.13269	1.78214
0.149411	-0.825617	29.3218	1.46719	1.77708	0.0602216	-1.22025	359.309	2.55547	2.09422	0.0819146	-1.08664	104.261	2.01812	1.85721	0.0601249	-1.22095	99.0775	1.99598	1.63478	0.250633	-0.600961	42.9858	1.63332	2.71785	0.153954	-0.812608	265.141	2.42348	2.98234	0.0627316	-1.20251	73.3224	1.86524	1.55112	0.039644	-1.40182	148.574	2.17194	1.54937	0.130169	-0.885491	163.264	2.21289	2.49905	0.0647023	-1.18908	126.186	2.10101	1.76692
0.115195	-0.938567	34.864	1.54238	1.64333	0.096577	-1.01513	97.5952	1.98943	1.95978	0.071036	-1.14852	215.262	2.33297	2.03128	0.0719222	-1.14314	88.4046	1.94648	1.70275	0.196263	-0.707162	101.111	2.0048	2.83499	0.138706	-0.857904	276.373	2.4415	2.84589	0.114032	-0.942975	29.8659	1.47517	1.56438	0.052307	-1.28144	180.784	2.25716	1.76142	0.221722	-0.654192	42.8619	1.63207	2.49479	0.160085	-0.795649	40.9631	1.61239	2.02651
0.139051	-0.856824	25.7837	1.41134	1.64718	0.0651507	-1.18608	210.291	2.32282	1.9584	0.0993892	-1.00266	110.582	2.04369	2.03826	0.0758331	-1.12014	78.4686	1.8947	1.69148	0.289054	-0.539021	36.0466	1.55686	2.88832	0.201845	-0.694982	61.4887	1.7888	2.57387	0.0515773	-1.28754	117.83	2.07126	1.60869	0.052016	-1.28386	146.29	2.16522	1.68648	0.171107	-0.766732	107.598	2.0318	2.64995	0.0560431	-1.25148	252.845	2.40285	1.92001
0.117737	-0.929086	39.1077	1.59226	1.71379	0.0818968	-1.08673	165.137	2.21785	2.04084	0.109303	-0.961368	65.3314	1.81512	1.88806	0.10779	-0.96742	53.0067	1.72433	1.7824	0.228143	-0.641793	108.211	2.03427	3.16967	0.199305	-0.700482	74.5188	1.87227	2.67283	0.0502682	-1.29871	183.121	2.26274	1.7423	0.0569041	-1.24486	115.158	2.06129	1.65585	0.215988	-0.665571	44.1752	1.64518	2.47183	0.141508	-0.84922	51.3408	1.71046	2.01416
0.150825	-0.821528	24.1072	1.38215	1.68241	0.0607964	-1.21612	295.138	2.47003	2.03107	0.074686	-1.12676	165.132	2.21783	1.96832	0.0912143	-1.03994	53.9377	1.73189	1.66538	0.164663	-0.783403	224.214	2.35066	3.00058	0.157516	-0.802675	194.268	2.2884	2.85097	0.0591601	-1.22797	181.824	2.25965	1.84015	0.0528131	-1.27726	210.81	2.32389	1.81944	0.158639	-0.799589	210.914	2.32411	2.90662	0.0866499	-1.06223	127.676	2.10611	1.98272
0.213822	-0.669947	13.6242	1.13431	1.69313	0.0932163	-1.03051	123.662	2.09223	2.03029	0.0804498	-1.09447	128.916	2.11031	1.92815	0.102128	-0.990857	40.8774	1.61148	1.62635	0.151699	-0.819017	163.375	2.21319	2.70225	0.231073	-0.636252	22.1944	1.34624	2.1159	0.0412982	-1.38407	142.978	2.15527	1.5572	0.0874638	-1.05817	62.4348	1.79543	1.69672	0.319919	-0.49496	11.8688	1.07441	2.17069	0.150312	-0.823006	33.5943	1.52627	1.8545
0.123655	-0.90779	43.6748	1.64023	1.80684	0.159045	-0.79848	29.0935	1.4638	1.83323	0.101022	-0.995582	93.4034	1.97036	1.97911	0.0819872	-1.08625	62.0589	1.7928	1.65045	0.21483	-0.667905	111.005	2.04534	3.06232	0.171939	-0.764625	99.5006	1.99783	2.61282	0.0715745	-1.14524	110.895	2.04491	1.78557	0.0357097	-1.44721	264.321	2.42213	1.67365	0.231573	-0.635312	53.7406	1.7303	2.72355	0.0732542	-1.13517	138.693	2.14205	1.88699
0.0941111	-1.02636	54.575	1.73699	1.69238	0.0472616	-1.32549	412.647	2.61558	1.97329	0.0697593	-1.1564	202.524	2.30648	1.99454	0.0695532	-1.15768	93.5268	1.97094	1.70248	0.280065	-0.552741	51.7387	1.71382	3.10057	0.172005	-0.764458	92.5457	1.96636	2.57222	0.0394687	-1.40375	391.088	2.59227	1.84668	0.0755044	-1.12203	54.0288	1.73263	1.54419	0.225677	-0.646513	55.8769	1.74723	2.70255	0.0863939	-1.06352	136.022	2.13361	2.00618
0.199869	-0.699254	15.7143	1.1963	1.71082	0.0657434	-1.18215	262.701	2.41946	2.04667	0.0726121	-1.13899	186.897	2.2716	1.9944	0.104932	-0.979093	48.7238	1.68774	1.72378	0.237233	-0.624826	57.3898	1.75883	2.81492	0.183078	-0.737364	61.1931	1.7867	2.42309	0.0862706	-1.06414	58.9829	1.77073	1.664	0.053385	-1.27258	139.678	2.14513	1.68565	0.188203	-0.725374	77.994	1.89206	2.60839	0.212538	-0.672563	20.5161	1.3121	1.95089
0.233307	-0.632072	12.0454	1.08082	1.70996	0.0790146	-1.10229	174.744	2.2424	2.03431	0.0929683	-1.03167	105.164	2.02187	1.95981	0.0767534	-1.1149	70.6226	1.84894	1.65839	0.162418	-0.789366	96.273	1.9835	2.51278	0.180992	-0.742341	83.2792	1.92054	2.58714	0.0743301	-1.12884	97.7142	1.98996	1.76284	0.0626153	-1.20332	132.516	2.12227	1.76368	0.155548	-0.808136	249.077	2.39633	2.96526	0.0499244	-1.30169	186.742	2.27124	1.74485
0.140685	-0.851753	26.7739	1.42771	1.6762	0.058347	-1.23398	346.369	2.53954	2.058	0.104936	-0.979076	68.9775	1.83871	1.878	0.10242	-0.989615	56.411	1.75136	1.76974	0.245889	-0.609261	108.282	2.03456	3.33938	0.166763	-0.7779	87.9793	1.94438	2.49952	0.0653772	-1.18457	96.1652	1.98302	1.67404	0.0782466	-1.10653	114.43	2.05854	1.86035	0.128096	-0.892464	328.311	2.51629	2.81948	0.0883735	-1.05368	107.437	2.03115	1.92768
0.279581	-0.553492	8.65038	0.937035	1.69295	0.107262	-0.969553	88.9975	1.94938	2.01059	0.122647	-0.911344	44.5188	1.64854	1.80891	0.0877803	-1.0566	77.1895	1.88756	1.78644	0.166944	-0.777429	121.819	2.08572	2.68284	0.190782	-0.719462	67.4384	1.82891	2.54205	0.0768976	-1.11409	186.758	2.27128	2.03869	0.0701268	-1.15412	63.7351	1.80438	1.56343	0.126856	-0.896688	205.779	2.3134	2.57994	0.0780462	-1.10765	138.257	2.14069	1.93264
0.116884	-0.932244	46.7082	1.66939	1.79073	0.0913308	-1.03938	127.52	2.10558	2.0258	0.0639123	-1.19442	263.132	2.42017	2.02624	0.0682101	-1.16615	77.6602	1.8902	1.62089	0.191955	-0.716801	149.17	2.17368	3.03248	0.282846	-0.548451	31.8236	1.50275	2.73999	0.0809178	-1.09196	57.1785	1.75723	1.60925	0.0582387	-1.23479	98.5417	1.99362	1.61454	0.241826	-0.616497	53.8312	1.73103	2.80785	0.0793376	-1.10052	128.312	2.10827	1.9157
0.117156	-0.931234	37.8925	1.57855	1.69512	0.0899902	-1.0458	119.236	2.07641	1.98546	0.081145	-1.09074	164.546	2.21629	2.03191	0.106223	-0.97378	42.2098	1.62541	1.66918	0.165415	-0.781425	117.11	2.06859	2.64721	0.171729	-0.765157	122.203	2.08708	2.72765	0.0677146	-1.16932	100.899	2.00389	1.71372	0.0702613	-1.15328	92.5425	1.96634	1.70499	0.168385	-0.773696	91.1278	1.95965	2.53284	0.0975327	-1.01085	93.3206	1.96998	1.94883
0.131902	-0.87975	40.9467	1.61222	1.83259	0.106673	-0.971944	78.5718	1.89527	1.94997	0.0880501	-1.05527	132.577	2.12247	2.0113	0.0837295	-1.07712	83.7243	1.92285	1.78518	0.196801	-0.705972	100.744	2.00322	2.83754	0.13706	-0.863088	178.375	2.25133	2.60846	0.0808887	-1.09211	50.9294	1.70697	1.563	0.0548291	-1.26099	143.033	2.15544	1.70932	0.188147	-0.725502	159.205	2.20196	3.03508	0.17995	-0.744848	27.6904	1.44233	1.93641
0.142943	-0.844837	23.5911	1.37275	1.62487	0.053379	-1.27263	276.709	2.44202	1.91888	0.0779783	-1.10803	133.612	2.12585	1.91859	0.065351	-1.18475	107.639	2.03197	1.71511	0.190612	-0.719849	72.9053	1.86276	2.58771	0.221702	-0.65423	28.8808	1.46061	2.23256	0.0545793	-1.26297	151.359	2.18001	1.72609	0.0491937	-1.30809	132.657	2.12273	1.62277	0.182733	-0.738183	107.703	2.03223	2.75302	0.224751	-0.648299	22.7431	1.35685	2.09294
0.181873	-0.740232	19.475	1.28948	1.74199	0.0756025	-1.12146	221.232	2.34485	2.09088	0.0898439	-1.04651	131.247	2.11809	2.02395	0.063619	-1.19641	81.5697	1.91153	1.59772	0.239885	-0.619997	45.6879	1.6598	2.67711	0.200694	-0.697466	56.4023	1.7513	2.51094	0.154295	-0.811648	11.6684	1.06701	1.31462	0.0717301	-1.1443	118.903	2.07519	1.81351	0.36382	-0.439114	17.3572	1.23948	2.82268	0.0553785	-1.25666	145.764	2.16365	1.72175
0.165087	-0.782286	32.8502	1.51654	1.9386	0.122156	-0.913084	83.5069	1.92172	2.10465	0.0972016	-1.01233	96.7161	1.9855	1.96132	0.0585961	-1.23213	102.872	2.0123	1.63318	0.170149	-0.76917	133.929	2.12688	2.76515	0.148884	-0.827152	226.746	2.35554	2.84777	0.0822266	-1.08499	133.347	2.12498	1.95853	0.0409331	-1.38792	264.194	2.42192	1.745	0.153571	-0.813692	134.352	2.12824	2.61554	0.105178	-0.978074	75.8172	1.87977	1.92191
0.12745	-0.894662	50.1616	1.70037	1.90057	0.0817565	-1.08748	192.939	2.28542	2.10158	0.0908806	-1.04153	115.292	2.0618	1.97959	0.13205	-0.879261	29.0515	1.46317	1.66409	0.141542	-0.849116	199.873	2.30075	2.70959	0.224407	-0.648963	43.5828	1.63932	2.52605	0.119207	-0.923698	35.4934	1.55015	1.6782	0.0573181	-1.24171	94.8698	1.97713	1.59226	0.230486	-0.637355	70.1037	1.84574	2.89594	0.190794	-0.719435	13.2153	1.12108	1.55828
0.147406	-0.831486	24.744	1.39347	1.67588	0.0937909	-1.02784	156.532	2.1946	2.13516	0.0859399	-1.0658	116.646	2.06687	1.93926	0.103293	-0.985929	39.0076	1.59115	1.61386	0.207644	-0.68268	110.121	2.04187	2.99096	0.262575	-0.580747	28.099	1.44869	2.49453	0.0594932	-1.22553	216.733	2.33593	1.90605	0.105968	-0.974827	39.0854	1.59201	1.63313	0.21921	-0.65914	80.7152	1.90696	2.8931	0.0649438	-1.18746	267.819	2.42784	2.04456
0.160736	-0.793887	15.5645	1.19213	1.50164	0.090557	-1.04308	114.139	2.05743	1.97246	0.116013	-0.935494	75.7395	1.87932	2.00891	0.0954975	-1.02001	45.6277	1.65923	1.62668	0.248255	-0.605103	66.5505	1.82315	3.01296	0.223559	-0.650608	48.7293	1.68779	2.59417	0.0716362	-1.14487	134.148	2.12758	1.85837	0.0490842	-1.30906	137.392	2.13796	1.63321	0.407328	-0.390056	9.9249	0.996726	2.55534	0.155962	-0.80698	40.4135	1.60653	1.99079
0.151681	-0.819067	28.0391	1.44776	1.76758	0.0610111	-1.21459	343.283	2.53565	2.08766	0.0701895	-1.15373	144.621	2.16023	1.87239	0.0985177	-1.00649	48.7504	1.68798	1.6771	0.180232	-0.744169	57.5757	1.76024	2.36538	0.1482	-0.829153	133.474	2.1254	2.56334	0.107565	-0.968329	30.8849	1.48975	1.53847	0.0374237	-1.42685	213.741	2.32989	1.63289	0.173448	-0.760831	116.348	2.06576	2.71513	0.105483	-0.97682	57.9556	1.7631	1.80493
0.148026	-0.829661	25.2845	1.40285	1.69088	0.0825598	-1.08323	165.366	2.21845	2.04799	0.0838851	-1.07632	167.481	2.22397	2.06628	0.0784639	-1.10533	66.4948	1.82279	1.64909	0.19582	-0.708144	94.8675	1.97712	2.79197	0.148594	-0.828	70.745	1.8497	2.23393	0.0653516	-1.18474	58.7413	1.76894	1.4931	0.055349	-1.25689	107.102	2.0298	1.61494	0.151864	-0.818544	184.012	2.26485	2.76692	0.0772282	-1.11222	120.589	2.08131	1.8713
0.12058	-0.918726	52.8085	1.7227	1.8751	0.0606928	-1.21686	329.49	2.51784	2.06913	0.111488	-0.952771	84.1235	1.92492	2.02034	0.0815567	-1.08854	49.0432	1.69058	1.55307	0.0834833	-1.0784	1047.7	3.02024	2.80066	0.128314	-0.891725	261.378	2.41727	2.71078	0.0532166	-1.27395	182.148	2.26042	1.77434	0.0510986	-1.29159	198.89	2.29861	1.77968	0.182101	-0.739687	110.095	2.04177	2.76031	0.147591	-0.830939	42.7212	1.63064	1.96241
0.149323	-0.825875	34.3089	1.53541	1.85913	0.0854585	-1.06824	133.368	2.12505	1.98929	0.113823	-0.943771	64.2879	1.80813	1.91585	0.119682	-0.92197	31.3555	1.49631	1.62295	0.156839	-0.804545	160.445	2.20533	2.74108	0.187432	-0.727156	42.7782	1.63122	2.24329	0.0576363	-1.2393	78.519	1.89497	1.52906	0.0700873	-1.15436	106.123	2.02581	1.75492	0.171719	-0.765182	91.2155	1.96007	2.56157	0.0971091	-1.01274	77.5512	1.88959	1.86582
0.202503	-0.693568	14.4216	1.15901	1.67109	0.109197	-0.96179	79.4139	1.8999	1.97538	0.10288	-0.987668	83.3193	1.92075	1.94473	0.0971187	-1.0127	38.8622	1.58953	1.5696	0.204627	-0.689038	107.26	2.03044	2.94677	0.24664	-0.607937	22.7702	1.35737	2.23274	0.0645813	-1.18989	132.295	2.12154	1.78297	0.0591454	-1.22808	127.961	2.10708	1.71575	0.263078	-0.579916	53.5998	1.72916	2.98175	0.0790989	-1.10183	157.093	2.19616	1.99319
0.138653	-0.85807	41.3952	1.61695	1.8844	0.0741312	-1.13	197.451	2.29546	2.03138	0.0591534	-1.22802	310.845	2.49254	2.02973	0.0913496	-1.03929	48.4996	1.68574	1.622	0.184407	-0.734224	110.263	2.04243	2.78175	0.229069	-0.640034	52.7141	1.72193	2.69037	0.116737	-0.932793	44.0424	1.64387	1.76231	0.0532847	-1.2734	152.08	2.18207	1.71358	0.257003	-0.590063	73.5465	1.86656	3.16333	0.0568156	-1.24553	329.31	2.51761	2.02131
0.171098	-0.766754	22.1207	1.3448	1.75389	0.0794159	-1.10009	180.343	2.2561	2.05083	0.0789456	-1.10267	144.862	2.16096	1.95974	0.0786312	-1.10441	56.5582	1.7525	1.58682	0.217246	-0.663047	90.3932	1.95614	2.95022	0.164304	-0.784352	86.2129	1.93557	2.46773	0.0560582	-1.25136	104.225	2.01797	1.61262	0.0640557	-1.19344	133.13	2.12428	1.77996	0.312373	-0.505326	20.4375	1.31043	2.59323	0.08703	-1.06033	138.711	2.14211	2.02023
0.103829	-0.983681	32.7516	1.51523	1.54037	0.133528	-0.874426	50.5771	1.70395	1.94865	0.0756204	-1.12136	152.216	2.18246	1.94626	0.0772624	-1.11203	61.9793	1.79225	1.61169	0.177883	-0.749866	147.898	2.16996	2.8938	0.161756	-0.791141	87.9405	1.94419	2.45745	0.104009	-0.982928	49.4443	1.69412	1.72354	0.0633519	-1.19824	77.944	1.89178	1.5788	0.130985	-0.882779	406.437	2.60899	2.95543	0.108691	-0.963807	78.3038	1.89378	1.9649
0.203308	-0.691847	13.9352	1.14411	1.65371	0.0777658	-1.10921	188.051	2.27427	2.05035	0.0874934	-1.05802	122.937	2.08968	1.97508	0.0941852	-1.02602	51.3627	1.71065	1.66727	0.175723	-0.755171	161.789	2.20895	2.9251	0.165794	-0.780432	163.004	2.2122	2.83458	0.10102	-0.995592	57.7191	1.76132	1.76912	0.0560133	-1.25171	160.794	2.20627	1.76261	0.200344	-0.698225	85.384	1.93138	2.76613	0.0786195	-1.10447	119.912	2.07886	1.88223
0.153774	-0.813117	23.3491	1.36827	1.68275	0.100285	-0.998764	97.2318	1.98781	1.99027	0.0874547	-1.05822	128.077	2.10747	1.99153	0.0555444	-1.25536	88.4014	1.94646	1.55052	0.197636	-0.704134	90.7643	1.95792	2.7806	0.109364	-0.961125	117.144	2.06872	2.15239	0.0735642	-1.13333	77.099	1.88705	1.66504	0.063628	-1.19635	77.1997	1.88762	1.57781	0.213981	-0.669624	43.5584	1.63907	2.44775	0.0994448	-1.00242	105.068	2.02147	2.0166
0.159029	-0.798525	24.1139	1.38227	1.73103	0.0594846	-1.2256	335.232	2.52535	2.06051	0.0779612	-1.10812	142.407	2.15353	1.94341	0.0451356	-1.34548	174.662	2.2422	1.66647	0.121741	-0.914562	267.972	2.42809	2.65492	0.1985	-0.702239	115.797	2.0637	2.93874	0.0691241	-1.16037	97.8623	1.99062	1.7155	0.0611656	-1.21349	158.825	2.20092	1.81371	0.27969	-0.553322	49.2081	1.69204	3.05796	0.070064	-1.1545	275.165	2.43959	2.11311
0.181382	-0.741406	16.0196	1.20465	1.62482	0.104972	-0.978926	111.096	2.0457	2.08974	0.114095	-0.942733	66.5232	1.82297	1.93371	0.0682429	-1.16594	105.292	2.0224	1.73456	0.151437	-0.819769	204.725	2.31117	2.8193	0.202306	-0.693991	41.9791	1.62303	2.3387	0.0550073	-1.25958	129.124	2.11101	1.67596	0.0565495	-1.24757	103.046	2.01303	1.61356	0.16582	-0.780362	174.649	2.24217	2.87324	0.03474	-1.45917	461.124	2.66382	1.82557
0.199007	-0.701131	16.3001	1.21219	1.72891	0.104857	-0.979402	91.6288	1.96203	2.0033	0.103971	-0.983088	93.1074	1.96898	2.00286	0.0882323	-1.05437	66.2468	1.82117	1.72725	0.166409	-0.778822	182.115	2.26035	2.90226	0.128877	-0.889826	228.757	2.35938	2.6515	0.0840409	-1.07551	76.9322	1.88611	1.75369	0.0551155	-1.25873	86.3669	1.93635	1.53834	0.189696	-0.721941	93.6188	1.97136	2.73064	0.174209	-0.75893	26.7607	1.4275	1.88093
0.126144	-0.899135	26.0411	1.41566	1.57447	0.0804464	-1.09449	230.463	2.3626	2.15863	0.0835472	-1.07807	116.948	2.06799	1.91824	0.112375	-0.949331	33.0451	1.51911	1.60019	0.12506	-0.90288	257.626	2.41099	2.67033	0.198935	-0.701288	45.3406	1.65649	2.36206	0.0857575	-1.06673	88.5944	1.94741	1.82559	0.0482893	-1.31615	195.329	2.29077	1.74051	0.337651	-0.471532	12.401	1.09346	2.31894	0.109685	-0.959854	69.7446	1.84351	1.92062
0.150098	-0.823625	26.9003	1.42976	1.73593	0.0719822	-1.14278	308.813	2.4897	2.17864	0.0758204	-1.12021	167.498	2.22401	1.98534	0.0942359	-1.02578	57.8546	1.76234	1.71804	0.172383	-0.763504	213.879	2.33017	3.05194	0.158927	-0.798802	142.76	2.15461	2.6973	0.0668687	-1.17478	101.188	2.00513	1.70682	0.0794216	-1.10006	41.5524	1.6186	1.47137	0.170767	-0.767597	162.47	2.21077	2.88012	0.0960476	-1.01751	68.357	1.83478	1.8032
0.0828677	-1.08161	88.226	1.9456	1.79879	0.0669433	-1.17429	231.188	2.36396	2.0131	0.0856371	-1.06734	151.396	2.18011	2.04257	0.0701537	-1.15395	50.0913	1.69976	1.473	0.161785	-0.791063	150.604	2.17784	2.75305	0.143987	-0.841676	251.283	2.40016	2.85165	0.0855034	-1.06802	62.3973	1.79517	1.68084	0.0601252	-1.22094	118.844	2.07498	1.69949	0.153905	-0.812746	115.785	2.06365	2.53911	0.0582199	-1.23493	301.875	2.47983	2.00807
0.12361	-0.907947	26.048	1.41577	1.55931	0.0497324	-1.30336	368.627	2.56659	1.96921	0.0759049	-1.11973	165.884	2.2198	1.98245	0.159054	-0.798455	19.4298	1.28847	1.6137	0.0997014	-1.0013	555.523	2.7447	2.74114	0.147178	-0.832157	180.796	2.25719	2.71246	0.0504224	-1.29738	116.211	2.06525	1.59186	0.0693448	-1.15899	113.509	2.05503	1.77313	0.174511	-0.758177	138.055	2.14005	2.82263	0.131742	-0.880276	32.9981	1.51849	1.72501
0.164005	-0.785143	18.7454	1.2729	1.62123	0.0816727	-1.08792	137.235	2.13746	1.96472	0.113036	-0.946783	62.8988	1.79864	1.89974	0.0931452	-1.03084	49.6606	1.69601	1.64527	0.194033	-0.712126	94.7001	1.97635	2.77528	0.141128	-0.850388	128.154	2.10773	2.47855	0.11445	-0.941383	37.8846	1.57846	1.67675	0.048289	-1.31615	225.435	2.35302	1.7878	0.231432	-0.635576	68.7328	1.83716	2.89055	0.106411	-0.973015	50.785	1.70574	1.75304
0.156762	-0.80476	24.1749	1.38336	1.71898	0.0718852	-1.14336	154.713	2.18953	1.91499	0.0883452	-1.05382	120.981	2.08272	1.97636	0.0830617	-1.0806	54.6623	1.73769	1.60808	0.18866	-0.72432	97.9123	1.99084	2.74856	0.177984	-0.74962	80.9839	1.9084	2.54582	0.0717579	-1.14413	79.0583	1.89795	1.65886	0.038243	-1.41745	326.903	2.51442	1.77391	0.285797	-0.543942	38.6022	1.58661	2.91688	0.0514308	-1.28878	271.62	2.43396	1.88858
0.178844	-0.747525	22.0558	1.34352	1.79729	0.100307	-0.998667	104.523	2.01921	2.02191	0.106367	-0.973193	100.744	2.00322	2.0584	0.0725904	-1.13912	63.5555	1.80315	1.58293	0.166094	-0.779647	116.01	2.0645	2.64799	0.187579	-0.726816	88.7652	1.94824	2.68052	0.0427872	-1.36869	193.938	2.28766	1.67143	0.0650661	-1.18664	113.066	2.05333	1.73037	0.198721	-0.701757	121.538	2.08471	2.9707	0.0995377	-1.00201	94.9553	1.97752	1.97355
0.135817	-0.867047	34.6217	1.53935	1.77539	0.0590463	-1.22881	260.495	2.4158	1.96597	0.102432	-0.989563	95.397	1.97953	2.00041	0.0664649	-1.17741	117.836	2.07128	1.75919	0.187463	-0.727085	66.9379	1.82567	2.51095	0.23565	-0.627733	33.1968	1.5211	2.42316	0.0450461	-1.34634	214.212	2.33084	1.73124	0.0478291	-1.32031	272.925	2.43604	1.84506	0.154162	-0.812021	197.985	2.29663	2.82829	0.110768	-0.955587	85.048	1.92966	2.01935
0.125406	-0.901683	29.2672	1.46638	1.62627	0.0888455	-1.05136	123.953	2.09326	1.99099	0.0811662	-1.09062	164.617	2.21647	2.0323	0.0672292	-1.17244	87.0772	1.9399	1.65458	0.225717	-0.646436	72.2213	1.85867	2.87525	0.185812	-0.730927	145.39	2.16253	2.95862	0.063516	-1.19712	100.819	2.00354	1.67364	0.0662343	-1.17892	117.47	2.06993	1.75579	0.179147	-0.746791	174.18	2.241	3.00084	0.137399	-0.862015	35.5839	1.55125	1.79957
0.158457	-0.80009	23.3125	1.36759	1.7093	0.0767586	-1.11487	151.869	2.18147	1.9567	0.103114	-0.986684	97.8595	1.9906	2.01747	0.0589495	-1.22952	137.233	2.13746	1.73845	0.285493	-0.544404	58.1083	1.76424	3.24068	0.23424	-0.630338	37.7817	1.57728	2.50228	0.116735	-0.932798	48.0432	1.68163	1.80278	0.0729607	-1.13691	98.6387	1.99405	1.75392	0.136119	-0.866081	236.746	2.37428	2.74141	0.0604217	-1.21881	186.37	2.27038	1.86279
0.117445	-0.930167	28.1022	1.44874	1.5575	0.0579882	-1.23666	322.003	2.50786	2.02793	0.082979	-1.08103	147.203	2.16792	2.00542	0.0714872	-1.14577	68.8916	1.83817	1.6043	0.187448	-0.727119	109.437	2.03916	2.80444	0.239021	-0.621563	25.0483	1.39878	2.25042	0.102699	-0.988434	43.8104	1.64158	1.66079	0.0413314	-1.38372	256.063	2.40835	1.74049	0.135866	-0.866888	268.781	2.4294	2.80244	0.109635	-0.960051	90.1475	1.95495	2.0363
0.145686	-0.836583	24.4905	1.389	1.66032	0.101884	-0.991895	63.4009	1.8021	1.81682	0.120283	-0.919795	63.2459	1.80103	1.95808	0.0747496	-1.12639	69.6768	1.84309	1.63628	0.15727	-0.803355	158.944	2.20124	2.74006	0.164277	-0.784424	129.508	2.1123	2.6928	0.0794263	-1.10004	61.1	1.78604	1.62362	0.0627611	-1.20231	68.3827	1.83495	1.52618	0.267307	-0.572989	17.8733	1.2522	2.18539	0.105766	-0.975655	85.1018	1.92994	1.9781
0.2539	-0.595338	12.301	1.08994	1.83079	0.0903181	-1.04423	129.597	2.11259	2.02312	0.108762	-0.963521	83.277	1.92052	1.99324	0.136184	-0.865875	18.1741	1.25945	1.45454	0.186697	-0.728863	95.7031	1.98093	2.71783	0.146133	-0.835252	123.93	2.09318	2.50604	0.103392	-0.985511	38.4925	1.58538	1.60868						0.239817	-0.62012	74.2555	1.87073	3.01672	0.0650846	-1.18652	177.797	2.24992	1.89623
0.170203	-0.769032	18.927	1.27708	1.66064	0.0781585	-1.10702	231.089	2.36378	2.13526	0.102038	-0.991238	77.0382	1.88671	1.90338	0.077859	-1.10869	65.0152	1.81301	1.63528	0.250513	-0.60117	79.8427	1.90224	3.16422	0.192684	-0.715155	75.4144	1.87745	2.62524	0.040137	-1.39645	247.975	2.39441	1.71463						0.325757	-0.487106	17.77	1.24969	2.56553	0.104119	-0.982471	108.212	2.03428	2.07057
0.172251	-0.763839	23.5627	1.37223	1.79648	0.0785069	-1.10509	178.01	2.25045	2.03643	0.117547	-0.929787	86.8394	1.93872	2.08512	0.0614608	-1.2114	92.4395	1.96586	1.6228	0.150315	-0.822999	211.993	2.32632	2.82664	0.131425	-0.881322	142.768	2.15463	2.44477	0.0665634	-1.17676	90.5919	1.95709	1.66311						0.201763	-0.695159	124.34	2.09461	3.01314	0.0999618	-1.00017	95.4421	1.97974	1.97941
0.157636	-0.802345	20.0454	1.30202	1.62276	0.0579687	-1.23681	441.635	2.64506	2.13862	0.102601	-0.98885	97.2609	1.98794	2.01035	0.0630523	-1.2003	107.169	2.03007	1.6913	0.169794	-0.770077	127.468	2.1054	2.73401	0.174976	-0.757021	77.0669	1.88687	2.49249	0.0770808	-1.11305	48.1252	1.68237	1.51149						0.218468	-0.660611	71.5279	1.85448	2.80721	0.0626023	-1.20341	297.204	2.47305	2.05504
0.131584	-0.880798	39.7036	1.59883	1.81521	0.0616741	-1.2099	406.284	2.60883	2.15624	0.0725582	-1.13931	174.885	2.24275	1.96851	0.06374	-1.19559	96.3714	1.98395	1.65939	0.273438	-0.563141	35.561	1.55097	2.75415	0.225253	-0.64733	66.5121	1.8229	2.81603	0.0559126	-1.25249	149.283	2.17401	1.73575						0.219627	-0.658314	70.7059	1.84946	2.80938	0.0934319	-1.0295	78.138	1.89286	1.83861
0.199957	-0.699064	14.9118	1.17353	1.67872	0.0992074	-1.00346	84.9293	1.92906	1.92241	0.091927	-1.03656	121.562	2.0848	2.01127	0.0940246	-1.02676	61.0305	1.78555	1.73901	0.217999	-0.661545	77.6245	1.89	2.85695	0.22023	-0.657124	61.3883	1.78809	2.72108	0.10787	-0.967099	54.4048	1.73564	1.79468						0.254897	-0.593635	38.5001	1.58546	2.67077	0.0712002	-1.14752	201.571	2.30443	2.00818
0.1602	-0.795338	18.0387	1.2562	1.57946	0.0933957	-1.02967	132.374	2.1218	2.06065	0.112352	-0.94942	69.0653	1.83926	1.93725	0.0924591	-1.03405	70.0003	1.8451	1.78434	0.241982	-0.616217	40.0226	1.60231	2.60023	0.202773	-0.692989	109.182	2.03815	2.9411	0.0508447	-1.29375	187.605	2.27324	1.75709						0.266026	-0.575076	65.4488	1.8159	3.15767	0.12447	-0.904936	74.374	1.87142	2.06801
0.104422	-0.981207	60.7134	1.78328	1.81744	0.0970392	-1.01305	128.962	2.11046	2.08327	0.101814	-0.992192	90.935	1.95873	1.97415	0.0586112	-1.23202	90.5202	1.95675	1.58824	0.129835	-0.886608	207.771	2.31758	2.61399	0.136892	-0.863621	181.726	2.25942	2.61622	0.0547204	-1.26185	164.931	2.2173	1.75718						0.25173	-0.599065	84.9552	1.92919	3.22033	0.156764	-0.804753	37.5481	1.57459	1.95661
0.140483	-0.852376	25.8173	1.41191	1.65644	0.0819129	-1.08665	151.494	2.1804	2.00654	0.0696627	-1.157	136.301	2.1345	1.84486	0.0700715	-1.15446	77.5633	1.88966	1.63683	0.25406	-0.595064	38.5978	1.58656	2.6662	0.197286	-0.704903	52.4808	1.72	2.44005	0.074772	-1.12626	80.6586	1.90665	1.6929						0.287497	-0.541366	31.655	1.50044	2.77159	0.0729288	-1.1371	98.8863	1.99514	1.75458
0.115243	-0.938386	74.9363	1.87469	1.99778	0.0813173	-1.08982	248.789	2.39583	2.19838	0.0813537	-1.08962	152.841	2.18424	2.00458	0.0716671	-1.14468	75.2104	1.87628	1.63913	0.18364	-0.736032	101.119	2.00483	2.72384	0.22656	-0.644817	39.1423	1.59265	2.46992	0.0723595	-1.1405	85.5651	1.9323	1.69425						0.385243	-0.414265	16.5286	1.21824	2.94072	0.0730425	-1.13642	132.564	2.12243	1.86764
0.131296	-0.88175	32.7609	1.51536	1.71858	0.0607961	-1.21612	395.205	2.59682	2.13533	0.0977835	-1.00973	77.4239	1.88888	1.87067	0.124543	-0.904679	44.2604	1.64602	1.81945	0.248153	-0.60528	58.2268	1.76512	2.91621	0.169326	-0.771276	70.4605	1.84795	2.39596	0.0351021	-1.45467	270.518	2.4322	1.672						0.180517	-0.743481	81.7987	1.91275	2.57269	0.100709	-0.996933	88.8242	1.94853	1.95453
0.106921	-0.970938	59.3061	1.7731	1.82617	0.074628	-1.1271	253.041	2.40319	2.13219	0.0945789	-1.02421	103.372	2.0144	1.96679	0.0521787	-1.28251	113.093	2.05344	1.60111	0.14333	-0.843662	369.875	2.56806	3.04394	0.250707	-0.600833	25.7252	1.41036	2.34734	0.0473323	-1.32484	436.614	2.6401	1.99276						0.163499	-0.786485	179.121	2.25315	2.86483	0.149574	-0.825144	45.9888	1.66265	2.01498
0.168874	-0.772438	24.1519	1.38295	1.79037	0.0863779	-1.0636	156.465	2.19442	2.0632	0.0739036	-1.13133	188.168	2.27455	2.0105	0.0978606	-1.00939	37.6258	1.57549	1.56083	0.188689	-0.724252	100.364	2.00158	2.76365	0.203291	-0.691881	56.8863	1.75501	2.53658	0.0603006	-1.21968	137.603	2.13863	1.75344						0.293193	-0.532846	30.2814	1.48118	2.77974	0.174164	-0.759041	33.6635	1.52716	2.01196
0.130694	-0.883743	27.6846	1.44224	1.63197	0.0495935	-1.30458	574.881	2.75958	2.11531	0.100392	-0.9983	104.565	2.01939	2.02282	0.0930606	-1.03123	68.1866	1.8337	1.77816	0.191466	-0.717907	160.332	2.20502	3.07145	0.224635	-0.648523	41.2622	1.61555	2.49113	0.0835983	-1.0778	57.295	1.75812	1.6312						0.247688	-0.606096	58.4944	1.76711	2.91557	0.165635	-0.780847	30.7375	1.48767	1.9052
0.083492	-1.07835	106.152	2.02593	1.87872	0.07996	-1.09713	185.608	2.2686	2.06776	0.0732724	-1.13506	141.137	2.14964	1.89386	0.084608	-1.07259	48.5754	1.68642	1.57229	0.174317	-0.758659	182.636	2.26159	2.98103	0.249328	-0.603229	38.4542	1.58494	2.62743	0.0618137	-1.20892	125.93	2.10013	1.7372						0.326814	-0.485699	20.683	1.31561	2.7087	0.0921181	-1.03566	76.2781	1.8824	1.81759
0.120955	-0.917375	51.4683	1.71154	1.86569	0.100292	-0.998736	105.04	2.02136	2.02392	0.0760887	-1.11868	159.842	2.20369	1.9699	0.0435531	-1.36098	217.278	2.33702	1.71716	0.154181	-0.811968	207.955	2.31797	2.85475	0.225839	-0.646201	26.9726	1.43092	2.21436	0.0563473	-1.24913	127.382	2.10511	1.68526						0.180122	-0.744433	81.3895	1.91057	2.56647	0.133254	-0.87532	44.3504	1.6469	1.88148
0.216767	-0.664007	13.0106	1.1143	1.67814	0.103053	-0.986939	118.047	2.07205	2.09948	0.0807203	-1.09302	124.825	2.0963	1.9179	0.0601053	-1.22109	109.029	2.03754	1.66863	0.253295	-0.596374	68.7633	1.83736	3.08088	0.151215	-0.820404	100.869	2.00376	2.44241	0.0426859	-1.36972	202.049	2.30546	1.68316						0.187448	-0.72712	72.6923	1.86149	2.56009	0.104898	-0.979232	55.4626	1.744	1.78099
0.113127	-0.946436	40.3577	1.60593	1.69682	0.0864563	-1.0632	149.866	2.1757	2.04637	0.0895218	-1.04807	90.6292	1.95727	1.8675	0.0769827	-1.11361	104.67	2.01982	1.81377	0.189832	-0.721631	137.796	2.13924	2.96445	0.219304	-0.658953	56.8105	1.75443	2.66245	0.111835	-0.951424	20.8541	1.31919	1.38654						0.210495	-0.676759	44.301	1.64641	2.43279	0.0949861	-1.02234	109.944	2.04117	1.99657
0.154767	-0.81032	38.5245	1.58574	1.95693	0.0973196	-1.0118	154.515	2.18897	2.16344	0.0688217	-1.16227	174.798	2.24254	1.92944	0.0950297	-1.02214	42.7889	1.63133	1.59599	0.147384	-0.83155	252.033	2.40146	2.88793	0.162261	-0.789785	75.0385	1.87528	2.37442	0.0594083	-1.22615	131.472	2.11883	1.72803						0.242144	-0.615926	45.9169	1.66197	2.69833	0.0825513	-1.08328	125.056	2.0971	1.93589
0.161718	-0.791243	20.5403	1.31261	1.65892	0.0913109	-1.03948	209.876	2.32196	2.23378	0.0913739	-1.03918	119.329	2.07675	1.99845	0.0612376	-1.21298	114.235	2.0578	1.69648	0.218233	-0.661079	82.9162	1.91864	2.90228	0.206595	-0.684881	66.6418	1.82375	2.66287	0.0231208	-1.636	396.096	2.5978	1.5879						0.309047	-0.509976	21.7933	1.33832	2.62429	0.115754	-0.936463	81.3256	1.91023	2.03983
0.077966	-1.10809	71.5613	1.85468	1.67375	0.0870628	-1.06017	167.404	2.22377	2.09756	0.106989	-0.970663	83.1992	1.92012	1.97815	0.0697384	-1.15653	78.0987	1.89264	1.63649	0.181658	-0.740747	120.21	2.07994	2.8079	0.139171	-0.85645	359.777	2.55603	2.98445	0.0927677	-1.0326	72.5458	1.86061	1.80187						0.238946	-0.621701	61.8479	1.79132	2.88133	0.0831855	-1.07995	139.617	2.14494	1.98614
0.152287	-0.817336	30.4048	1.48294	1.81436	0.0910261	-1.04083	134.463	2.1286	2.04509	0.0706031	-1.15118	202.549	2.30653	2.00363	0.0931017	-1.03104	52.58	1.72082	1.66901	0.236543	-0.62609	58.9732	1.77065	2.82812	0.117827	-0.928755	194.238	2.28833	2.46387	0.0386144	-1.41325	279.746	2.44676	1.7313						0.125235	-0.902274	249.926	2.39781	2.65752	0.061534	-1.21088	239.27	2.37889	1.96459
0.166338	-0.779008	25.6829	1.40964	1.80954	0.120149	-0.920281	56.6581	1.75326	1.90514	0.0972859	-1.01195	84.2153	1.92539	1.90265	0.105549	-0.976544	47.267	1.67456	1.71478	0.250902	-0.600496	54.2702	1.73456	2.88855	0.132647	-0.877303	177.907	2.25019	2.5649	0.0890909	-1.05017	52.5626	1.72068	1.63848						0.112858	-0.947467	344.608	2.53733	2.67801	0.0907808	-1.04201	178.059	2.25056	2.15984
0.144238	-0.840921	20.6301	1.3145	1.56317	0.0667635	-1.17546	244.151	2.38766	2.03125	0.0812279	-1.09029	171.022	2.23305	2.04812	0.0581099	-1.23575	157.662	2.19773	1.77846	0.127451	-0.894656	250.361	2.39857	2.681	0.211601	-0.674482	47.7507	1.67898	2.48929	0.0628681	-1.20157	60.3687	1.78081	1.48207						0.220459	-0.656672	108.301	2.03463	3.0984	0.0449239	-1.34752	544.928	2.73634	2.03064
0.123766	-0.907398	23.9619	1.37952	1.52031	0.0595404	-1.22519	324.254	2.51089	2.04939	0.0985827	-1.0062	98.0645	1.99151	1.97924	0.104635	-0.980321	53.8065	1.73084	1.76558	0.256596	-0.59075	42.2167	1.62548	2.75156	0.243141	-0.614141	40.4719	1.60715	2.61691	0.102324	-0.990024	74.565	1.87254	1.8914						0.131332	-0.881629	250.14	2.39818	2.72017	0.129125	-0.88899	34.5167	1.53803	1.73009
0.174696	-0.757717	25.3976	1.40479	1.85398	0.0611082	-1.2139	370.422	2.5687	2.11607	0.098803	-1.00523	94.0602	1.97341	1.96314	0.05493	-1.26019	101.16	2.00501	1.59104	0.158814	-0.799111	226.109	2.35432	2.94617	0.161852	-0.790881	32.3035	1.50925	1.90831	0.0681835	-1.16632	94.0163	1.9732	1.69182						0.157934	-0.801524	209.942	2.3221	2.89711	0.140933	-0.850987	35.2966	1.54773	1.81875
0.173362	-0.761047	20.7857	1.31776	1.73152	0.10304	-0.986996	119.075	2.07582	2.10317	0.0692909	-1.15932	201.416	2.30409	1.98745	0.195216	-0.709484	27.2625	1.43557	2.02339	0.121313	-0.916091	582.261	2.76512	3.01839	0.137534	-0.86159	113.648	2.05556	2.38578	0.0649326	-1.18754	196.553	2.29348	1.93129						0.261853	-0.581942	40.2361	1.60462	2.75735	0.0813983	-1.08938	117.265	2.06917	1.89939
0.115301	-0.938166	42.8931	1.63239	1.73998	0.0726596	-1.13871	217.027	2.33651	2.0519	0.0773181	-1.11172	183.467	2.26356	2.03609	0.0917601	-1.03735	58.2008	1.76493	1.70139	0.183998	-0.735186	172.921	2.23785	3.04392	0.210145	-0.677481	52.5054	1.7202	2.53912	0.0777472	-1.10932	91.6317	1.96205	1.7687						0.184343	-0.734373	208.469	2.31904	3.15785	0.0832536	-1.0796	137.36	2.13786	1.98024
0.16916	-0.771701	21.8015	1.33849	1.73446	0.0756858	-1.12099	202.769	2.307	2.05801	0.0670491	-1.17361	246.654	2.39209	2.03824	0.089795	-1.04675	55.8875	1.74731	1.66928	0.147903	-0.830023	205.017	2.31179	2.78521	0.156402	-0.805759	212.318	2.32699	2.88795	0.0479347	-1.31935	225.581	2.3533	1.78368						0.280538	-0.552009	18.9949	1.27864	2.31634	0.109354	-0.961166	107.126	2.0299	2.11191
0.128136	-0.892328	42.3931	1.6273	1.82365	0.0962833	-1.01645	123.173	2.09051	2.05668	0.0776874	-1.10965	147.137	2.16772	1.95352	0.0758902	-1.11981	78.0224	1.89222	1.68976	0.203674	-0.691065	85.3007	1.93095	2.79417	0.212984	-0.671652	29.0589	1.46328	2.17863	0.0648194	-1.18829	122.877	2.08947	1.75838						0.291253	-0.535729	25.765	1.41103	2.63385	0.157543	-0.802602	40.1375	1.60355	1.99794
0.0958712	-1.01831	83.36	1.92096	1.88641	0.106927	-0.970913	110.424	2.04306	2.10427	0.0876166	-1.05741	103.953	2.01684	1.90733	0.111452	-0.952911	26.5232	1.42363	1.49398	0.161129	-0.792826	204.166	2.30998	2.91361	0.279856	-0.553065	38.1735	1.58176	2.85999	0.0634098	-1.19784	121.095	2.08312	1.73906						0.343107	-0.46457	22.2767	1.34785	2.90129	0.125694	-0.900685	47.8236	1.67964	1.86485
0.191274	-0.718343	15.7048	1.19603	1.66499	0.107027	-0.970506	92.6185	1.9667	2.02647	0.0848554	-1.07132	151.418	2.18018	2.03504	0.170423	-0.768471	25.7413	1.41063	1.83563	0.142177	-0.847172	149.678	2.17516	2.56755	0.171374	-0.766056	78.4269	1.89447	2.47301	0.0491701	-1.3083	215.144	2.33273	1.78302						0.110195	-0.957839	714.392	2.85394	2.97956	0.0490838	-1.30906	216.765	2.33599	1.78448
0.159755	-0.796545	23.5451	1.3719	1.72231	0.0814439	-1.08914	195.367	2.29085	2.10336	0.0873844	-1.05857	136.339	2.13462	2.01652	0.0756607	-1.12113	52.2781	1.71832	1.53267	0.259516	-0.585835	37.7764	1.57722	2.69226	0.203968	-0.690438	44.4038	1.64742	2.38605	0.0959289	-1.01805	42.4725	1.62811	1.59924						0.195939	-0.707879	128.897	2.11024	2.98108	0.100976	-0.995783	107.195	2.03018	2.03877
0.116481	-0.933746	54.8743	1.73937	1.86279	0.081706	-1.08775	191.181	2.28145	2.09741	0.0801843	-1.09591	157.845	2.19823	2.00585	0.0815606	-1.08852	64.3279	1.8084	1.66134	0.157837	-0.801791	120.996	2.08277	2.59765	0.171723	-0.765173	45.1513	1.65467	2.16248	0.0808584	-1.09227	40.9557	1.61231	1.47611						0.188674	-0.724288	109.686	2.04015	2.81677	0.109149	-0.961981	56.9766	1.7557	1.82508
0.16213	-0.790136	21.1019	1.32432	1.67607	0.0477791	-1.32076	555.432	2.74463	2.07807	0.0762287	-1.11788	184.585	2.2662	2.02722	0.125523	-0.901277	29.6902	1.47261	1.63392	0.229655	-0.638925	55.0042	1.7404	2.72394	0.185283	-0.732164	55.5996	1.74507	2.38344	0.0686555	-1.16332	101.42	2.00612	1.72447						0.148836	-0.827291	211.289	2.32488	2.81023	0.103817	-0.983731	108.734	2.03637	2.07004
0.154873	-0.810023	23.0051	1.36182	1.68122	0.0877276	-1.05686	177.401	2.24896	2.12795	0.0654178	-1.1843	202.475	2.30637	1.94745	0.0970405	-1.01305	61.5655	1.78934	1.76629	0.130804	-0.883378	263.131	2.42017	2.73968	0.151371	-0.819958	78.9899	1.89757	2.31423	0.0502315	-1.29902	115.647	2.06313	1.58822						0.191041	-0.718873	104.632	2.01966	2.80949	0.0457936	-1.3392	682.337	2.834	2.11619
0.12583	-0.900216	35.0768	1.54502	1.71628	0.071977	-1.14281	287.207	2.45819	2.15102	0.0843975	-1.07367	149.575	2.17486	2.02563	0.0980532	-1.00854	42.4057	1.62742	1.61365	0.184214	-0.734677	115.299	2.06183	2.80644	0.210979	-0.67576	80.8724	1.9078	2.82319	0.0567876	-1.24575	175.834	2.2451	1.80222						0.193348	-0.713661	41.8722	1.62193	2.27269	0.0976654	-1.01026	79.0491	1.8979	1.87862
0.108408	-0.964939	35.7966	1.55384	1.6103	0.142646	-0.845741	49.7312	1.69663	2.00609	0.0805757	-1.0938	162.278	2.21026	2.02072	0.0759616	-1.11941	76.5429	1.8839	1.68295	0.169708	-0.770298	97.2795	1.98802	2.58085	0.147988	-0.829773	74.8736	1.87433	2.25884	0.0522187	-1.28217	112.78	2.05223	1.60059						0.176787	-0.75255	112.338	2.05053	2.72477	0.131725	-0.88033	44.7443	1.65074	1.87514
0.130353	-0.88488	32.8273	1.51624	1.71349	0.083204	-1.07986	143.157	2.15581	1.99639	0.0734199	-1.13419	199.797	2.30059	2.0284	0.109035	-0.962433	38.7383	1.58814	1.65013	0.184362	-0.734328	118.475	2.07363	2.82384	0.154251	-0.811772	65.043	1.8132	2.23363	0.0762844	-1.11756	272.986	2.43614	2.17987						0.231594	-0.635273	49.5269	1.69484	2.6679	0.0394731	-1.4037	613.202	2.7876	1.9859
0.153257	-0.81458	28.2735	1.45138	1.78175	0.0764726	-1.11649	167.732	2.22462	1.9925	0.0678584	-1.1684	235.808	2.37256	2.03061	0.0861439	-1.06478	58.7766	1.7692	1.66158	0.183132	-0.737235	144.09	2.15863	2.92801	0.232063	-0.634395	61.3064	1.78751	2.81766	0.0816383	-1.08811	49.364	1.69341	1.55629						0.252713	-0.597372	36.7185	1.56488	2.61962	0.0639443	-1.1942	167.948	2.22517	1.86332
0.210492	-0.676765	13.6789	1.13605	1.67865	0.0992097	-1.00345	92.6275	1.96674	1.95999	0.0702308	-1.15347	250.337	2.39853	2.0794	0.0874198	-1.05839	88.1059	1.94501	1.8377	0.15948	-0.797295	218.554	2.33956	2.93437	0.238422	-0.622653	21.2293	1.32693	2.1311	0.0333286	-1.47718	292.285	2.46581	1.66926						0.17122	-0.766446	326.103	2.51335	3.27923	0.12505	-0.902915	57.7193	1.76132	1.95071
0.172636	-0.762869	20.2867	1.30721	1.71355	0.0753295	-1.12303	153.749	2.18681	1.94723	0.0848877	-1.07116	133.526	2.12557	1.98437	0.0713728	-1.14647	78.4691	1.8947	1.65264	0.176412	-0.753472	216.153	2.33476	3.09867	0.20062	-0.697625	76.8458	1.88562	2.70291	0.0992963	-1.00307	51.3007	1.71012	1.70489						0.317428	-0.498355	14.7651	1.16924	2.34619	0.0915186	-1.03849	96.1064	1.98275	1.90926
0.190587	-0.719907	23.9127	1.37863	1.91501	0.0793833	-1.10027	157.428	2.19708	1.99686	0.0907426	-1.04219	116.248	2.06539	1.98178	0.0490971	-1.30894	174.488	2.24176	1.71265	0.176782	-0.752561	137.479	2.13824	2.84128	0.260573	-0.584071	36.9127	1.56718	2.68319	0.0589304	-1.22966	121.806	2.08567	1.69613						0.206428	-0.685231	63.6492	1.80379	2.63239	0.185834	-0.730874	38.3679	1.58397	2.16723
0.201666	-0.695366	14.1427	1.15053	1.65457	0.136775	-0.863994	55.8345	1.7469	2.02189	0.0718839	-1.14337	174.895	2.24278	1.96155	0.0721501	-1.14176	84.5547	1.92714	1.68786	0.151783	-0.818778	286.504	2.45713	3.00097	0.109969	-0.958731	198.725	2.29825	2.39718	0.142011	-0.847679	13.3356	1.12501	1.32717						0.22448	-0.648823	54.7634	1.73849	2.67945	0.094578	-1.02421	127.488	2.10547	2.0557
0.151821	-0.818669	26.6636	1.42592	1.74175	0.105797	-0.975525	52.0491	1.71641	1.75948	0.0791448	-1.10158	161.82	2.20903	2.00533	0.134283	-0.871979	28.8333	1.45989	1.67423	0.127375	-0.894917	186.149	2.26986	2.53639	0.152358	-0.817135	110.691	2.04411	2.50156	0.0481498	-1.31741	147.657	2.16925	1.64661						0.206337	-0.685423	115.838	2.06385	3.01106	0.0924094	-1.03428	84.5164	1.92694	1.86307
0.099149	-1.00371	80.1773	1.90405	1.89701	0.0725724	-1.13923	155.891	2.19282	1.92483	0.0797457	-1.09829	126.95	2.10363	1.91537	0.0733832	-1.1344	63.2447	1.80102	1.58764	0.180628	-0.743215	157.248	2.19658	2.95552	0.168764	-0.772719	94.808	1.97685	2.5583	0.0457423	-1.33968	189.054	2.27659	1.69935						0.203843	-0.690704	90.9551	1.95883	2.83599	0.0547137	-1.2619	201.442	2.30415	1.82593
0.147764	-0.83043	28.3184	1.45207	1.74857	0.0953714	-1.02058	87.3647	1.94134	1.90219	0.0752274	-1.12362	153.731	2.18676	1.94617	0.062042	-1.20731	100.452	2.00196	1.65819	0.167542	-0.775877	161.431	2.20799	2.84579	0.121458	-0.915575	150.986	2.17894	2.37986	0.0480496	-1.31831	305.472	2.48497	1.88497						0.172316	-0.763673	230.412	2.3625	3.09361	0.171301	-0.76624	27.4916	1.4392	1.87826
0.163291	-0.787038	23.0332	1.36235	1.73099	0.0863153	-1.06391	160.667	2.20593	2.07341	0.0951899	-1.02141	93.9754	1.97301	1.93166	0.0694753	-1.15817	102.176	2.00935	1.73494	0.233797	-0.631161	51.2358	1.70957	2.70862	0.211138	-0.675434	33.9689	1.53108	2.26681	0.0511181	-1.29143	115.234	2.06158	1.59636						0.17323	-0.761376	113.62	2.05546	2.69966	0.0679092	-1.16807	221.205	2.34479	2.00741
0.121673	-0.914805	33.3133	1.52262	1.66442	0.0758247	-1.12019	172.761	2.23744	1.99738	0.0729042	-1.13725	128.04	2.10735	1.85302	0.0704335	-1.15222	63.8823	1.80538	1.56687	0.138576	-0.858311	254.459	2.40562	2.80273	0.235931	-0.627215	41.4981	1.61803	2.5797	0.0636947	-1.1959	96.4087	1.98412	1.6591						0.138384	-0.858915	302.913	2.48132	2.8889	0.0797168	-1.09845	77.2686	1.888	1.71879
0.124159	-0.906023	27.6855	1.44225	1.59185	0.0571055	-1.24332	499.315	2.69837	2.17029	0.0949556	-1.02248	98.1232	1.99177	1.94798	0.0870419	-1.06027	46.8652	1.67085	1.57587	0.207725	-0.682511	125.326	2.09804	3.074	0.176383	-0.753543	105.718	2.02415	2.68618	0.05865	-1.23173	64.1668	1.80731	1.46729						0.145923	-0.835876	167.884	2.22501	2.66189	0.126154	-0.8991	63.1107	1.8001	2.00212
0.246072	-0.608938	9.61852	0.983108	1.61446	0.073084	-1.13618	231.369	2.36431	2.08093	0.0930527	-1.03127	100.913	2.00395	1.94318	0.127272	-0.895267	33.6995	1.52762	1.70633	0.177768	-0.750146	135.174	2.13089	2.84064	0.183913	-0.735388	108.431	2.03515	2.76746	0.0981047	-1.00831	53.3478	1.72712	1.71288						0.228128	-0.641821	54.5196	1.73655	2.70566	0.0948351	-1.02303	100.761	2.00329	1.9582
0.0874185	-1.0584	60.7662	1.78366	1.68525	0.0801081	-1.09632	155.453	2.1916	1.99904	0.0842413	-1.07447	149.422	2.17441	2.0237	0.0791194	-1.10172	63.3739	1.80191	1.63555	0.180146	-0.744375	225.978	2.35407	3.16247	0.165857	-0.780265	102.614	2.01121	2.57759	0.089263	-1.04933	59.5206	1.77467	1.69124						0.285567	-0.544292	19.809	1.29686	2.38266	0.066738	-1.17563	196.352	2.29304	1.95048
0.205041	-0.688159	17.5985	1.24548	1.80987	0.0571859	-1.24271	417.419	2.62057	2.10875	0.0634722	-1.19742	259.081	2.41343	2.01553	0.0761528	-1.11831	83.2073	1.92016	1.71701	0.205543	-0.687097	71.6732	1.85536	2.70028	0.171186	-0.766532	106.955	2.0292	2.64725	0.130173	-0.885478	44.2819	1.64623	1.85914						0.198748	-0.701698	67.6241	1.8301	2.6081	0.217089	-0.663363	18.6173	1.26992	1.91436
0.161391	-0.792121	21.3874	1.33016	1.67923	0.120536	-0.918883	105.39	2.0228	2.20137	0.0627895	-1.20211	272.591	2.43551	2.02603	0.0691165	-1.16042	80.6368	1.90653	1.64297	0.200859	-0.697109	169.72	2.22973	3.19854	0.187556	-0.72687	69.8405	1.84411	2.53705	0.0578838	-1.23744	75.749	1.87938	1.51876						0.254769	-0.593853	46.374	1.66627	2.80587	0.0894098	-1.04861	102.094	2.009	1.91586
0.158962	-0.798707	28.2068	1.45035	1.81588	0.109513	-0.960536	81.6964	1.9122	1.99077	0.0628332	-1.20181	210.077	2.32238	1.9324	0.062029	-1.2074	119.963	2.07905	1.72191	0.186204	-0.730011	87.6655	1.94283	2.66137	0.243889	-0.612808	34.0954	1.5327	2.5011	0.0644168	-1.191	81.3592	1.91041	1.60404						0.215718	-0.666113	134.239	2.12788	3.19447	0.123771	-0.907381	43.7727	1.6412	1.80873
0.135425	-0.868302	34.1144	1.53294	1.76544	0.112363	-0.949376	92.6393	1.9668	2.07167	0.0679445	-1.16785	208.656	2.31943	1.98608	0.0860363	-1.06532	48.735	1.68784	1.58435	0.172417	-0.763419	251.293	2.40018	3.14399	0.248971	-0.603851	90.5031	1.95666	3.24031	0.070276	-1.15319	122.531	2.08825	1.81084						0.209953	-0.677878	49.8675	1.69782	2.50461	0.10396	-0.983134	82.7093	1.91755	1.95045
0.144363	-0.840544	27.4743	1.43893	1.7119	0.083547	-1.07807	125.406	2.09832	1.94637	0.106379	-0.973143	76.81	1.88542	1.93745	0.0794388	-1.09997	58.7175	1.76877	1.60802	0.180772	-0.742869	107.089	2.02974	2.7323	0.160512	-0.794494	215.119	2.33268	2.93606	0.0524284	-1.28043	134.787	2.12965	1.66322						0.137254	-0.862474	371.869	2.57039	2.98025	0.0990984	-1.00393	72.1202	1.85806	1.85078
0.111448	-0.952927	70.9858	1.85117	1.94262	0.0839321	-1.07607	162.994	2.21217	2.05578	0.0707226	-1.15044	194.531	2.28899	1.98966	0.0838835	-1.07632	58.5439	1.76748	1.64215	0.219181	-0.659196	69.3043	1.84076	2.79243	0.131561	-0.880872	220.199	2.34281	2.65965	0.0592154	-1.22757	105.887	2.02484	1.64948						0.392532	-0.406125	10.0194	1.00084	2.46437	0.17072	-0.767717	36.5781	1.56322	2.0362
0.100251	-0.998912	48.4082	1.68492	1.68675	0.09369	-1.02831	153.54	2.18622	2.12604	0.0826698	-1.08265	142.514	2.15386	1.98942	0.152733	-0.816066	23.0196	1.3621	1.6691	0.250179	-0.601749	63.4572	1.80248	2.9954	0.149364	-0.825753	97.4689	1.98887	2.40855	0.0580723	-1.23603	134.769	2.12959	1.72293						0.173543	-0.760592	144.28	2.15921	2.83885	0.103099	-0.986746	112.505	2.05117	2.07872
0.154683	-0.810558	32.7081	1.51466	1.86866	0.0794875	-1.0997	159.536	2.20286	2.00314	0.0841476	-1.07496	146.411	2.16557	2.01457	0.0820465	-1.08594	54.1819	1.73385	1.59664	0.158268	-0.800607	124.209	2.09415	2.61571	0.316796	-0.49922	14.4386	1.15952	2.32267	0.0530959	-1.27494	131.083	2.11755	1.6609						0.116779	-0.932636	425.921	2.62933	2.81924	0.0715325	-1.1455	162.554	2.211	1.93016
0.0942282	-1.02582	44.7281	1.65058	1.60904	0.0820704	-1.08581	181.819	2.25964	2.08106	0.0808821	-1.09215	143.126	2.15572	1.97383	0.118146	-0.927582	36.5037	1.56234	1.68431	0.32776	-0.484444	16.8328	1.22616	2.53106	0.212057	-0.673548	58.6893	1.76856	2.62574	0.0677637	-1.169	33.6904	1.52751	1.30667						0.236261	-0.626609	84.0798	1.92469	3.0716	0.0839064	-1.07621	107.938	2.03318	1.88921
0.127027	-0.896105	25.8878	1.4131	1.57693	0.0644068	-1.19107	325.062	2.51197	2.109	0.0809145	-1.09197	115.043	2.06086	1.88728	0.0377316	-1.42329	283.345	2.45232	1.72299	0.150387	-0.822789	209.415	2.32101	2.8209	0.196696	-0.706204	57.3566	1.75858	2.49019	0.0932747	-1.03024	64.6918	1.81085	1.7577						0.155915	-0.807113	171.198	2.2335	2.76727	0.105079	-0.978483	72.9542	1.86305	1.90402
0.138676	-0.857999	30.1559	1.47937	1.72421	0.080545	-1.09396	332.744	2.52211	2.30548	0.100923	-0.996011	85.2484	1.93069	1.93842	0.0941081	-1.02637	55.2301	1.74218	1.69741	0.146871	-0.833063	261.209	2.41699	2.90133	0.165278	-0.781785	172.724	2.23735	2.86185	0.0736636	-1.13275	67.7519	1.83092	1.61636						0.315931	-0.500408	28.1923	1.45013	2.8979	0.0945898	-1.02416	103.29	2.01406	1.96655
0.162051	-0.790347	23.5749	1.37245	1.73652	0.079857	-1.09769	100.91	2.00394	1.8256	0.0622178	-1.20609	227.191	2.35639	1.95375	0.103378	-0.985571	38.4273	1.58464	1.60784	0.237566	-0.624216	117.989	2.07184	3.31911	0.21695	-0.663641	47.8039	1.67946	2.53068	0.105921	-0.975017	45.8833	1.66165	1.70423						0.210019	-0.677742	95.3107	1.97914	2.9202	0.0692489	-1.15959	175.673	2.24471	1.93578
0.145419	-0.837379	36.6545	1.56413	1.86789	0.0939503	-1.0271	132.217	2.12129	2.06531	0.0841782	-1.0748	160.939	2.20666	2.05309	0.0687829	-1.16252	86.7646	1.93834	1.66736	0.195723	-0.708359	120.128	2.07964	2.93586	0.322866	-0.490978	30.8025	1.48859	3.03188	0.0540333	-1.26734	144.509	2.15989	1.70428						0.141856	-0.848151	230.451	2.36258	2.78556	0.0896143	-1.04762	142.864	2.15492	2.05696
0.109616	-0.960127	61.8953	1.79166	1.86606	0.083687	-1.07734	218.558	2.33957	2.17161	0.0894144	-1.04859	118.496	2.0737	1.97761	0.0616401	-1.21014	99.3636	1.99723	1.65041	0.211689	-0.674303	100.585	2.00253	2.96978	0.183617	-0.736088	123.511	2.09171	2.84165	0.101755	-0.992442	47.4382	1.67613	1.68889						0.271772	-0.565795	38.3566	1.58384	2.79932	0.167433	-0.77616	32.7212	1.51483	1.9517
0.120936	-0.917446	38.1211	1.58117	1.72344	0.0670331	-1.17371	236.296	2.37346	2.02218	0.106567	-0.972378	93.1163	1.96903	2.02496	0.0754337	-1.12243	76.8537	1.88567	1.67998	0.254643	-0.594069	35.4546	1.54967	2.60858	0.134893	-0.870012	225.887	2.35389	2.70559	0.0624744	-1.2043	63.0792	1.79989	1.49455						0.289535	-0.538299	12.5512	1.09869	2.04103	0.0754825	-1.12215	130.277	2.11487	1.88465
0.171327	-0.766175	23.0174	1.36206	1.77774	0.0558047	-1.25333	321.063	2.50659	1.99994	0.0766239	-1.11564	160.007	2.20414	1.97568	0.0525346	-1.27955	168.783	2.22733	1.74071	0.139062	-0.856791	242.692	2.38506	2.78371	0.212749	-0.672132	90.0208	1.95434	2.90768	0.112832	-0.947568	41.8961	1.62217	1.71193						0.26181	-0.582014	91.773	1.96271	3.37228	0.101865	-0.991973	70.7783	1.8499	1.86487
0.10737	-0.969118	45.6494	1.65944	1.71231	0.0641335	-1.19291	287.87	2.4592	2.0615	0.101375	-0.99407	91.4573	1.96122	1.97292	0.0740947	-1.13021	81.8578	1.91306	1.69265	0.145436	-0.837328	159.394	2.20247	2.63036	0.195955	-0.707844	54.1677	1.73374	2.44933	0.0771649	-1.11258	74.455	1.87189	1.68248						0.206633	-0.684801	72.1326	1.85813	2.71339	0.0890595	-1.05032	111.968	2.04909	1.95092
0.114381	-0.941645	30.8299	1.48897	1.58125	0.0563305	-1.24926	454.589	2.65762	2.12736	0.0805024	-1.09419	140.16	2.14662	1.96183	0.0963862	-1.01599	52.709	1.72188	1.69479	0.176908	-0.752254	117.926	2.07161	2.75387	0.164038	-0.785056	54.6134	1.7373	2.21296	0.0632058	-1.19924	97.2476	1.98788	1.65761						0.320031	-0.494808	11.4483	1.05874	2.1397	0.147056	-0.832517	31.8902	1.50366	1.80616
0.08974	-1.04701	59.5071	1.77457	1.69489	0.0597047	-1.22399	357.905	2.55377	2.08643	0.06796	-1.16775	261.66	2.41774	2.07043	0.106413	-0.973006	41.915	1.62237	1.66738	0.196366	-0.706933	112.692	2.05189	2.90253	0.159724	-0.796629	155.914	2.19289	2.75271	0.0636499	-1.1962	89.9857	1.95417	1.63365						0.234328	-0.630176	29.9151	1.47589	2.34203	0.132972	-0.876239	49.5048	1.69465	1.934
0.114239	-0.942185	49.9582	1.69861	1.80284	0.0952226	-1.02126	116.749	2.06725	2.02422	0.0707914	-1.15002	224.849	2.35189	2.04509	0.0852718	-1.06919	56.7573	1.75402	1.64051	0.146733	-0.833471	278.648	2.44506	2.93358	0.182938	-0.737695	63.9447	1.8058	2.4479	0.0575766	-1.23975	193.886	2.28755	1.84516						0.204903	-0.688452	47.9697	1.68097	2.44166	0.12395	-0.906755	56.8674	1.75486	1.93532
0.0896557	-1.04742	83.1838	1.92004	1.83311	0.0722408	-1.14122	156.308	2.19398	1.92249	0.0897366	-1.04703	117.797	2.07113	1.9781	0.081011	-1.09146	53.0185	1.72443	1.57993	0.233595	-0.631536	101.273	2.00549	3.17558	0.264187	-0.578088	31.288	1.49538	2.58676	0.0549219	-1.26025	273.661	2.43721	1.93391						0.192395	-0.715807	61.572	1.78938	2.49981	0.0790987	-1.10183	131.229	2.11803	1.92228
0.150402	-0.822747	25.7522	1.41081	1.71476	0.0680047	-1.16746	202.202	2.30578	1.97504	0.109312	-0.961334	88.9066	1.94893	2.02732	0.149668	-0.824872	23.3777	1.3688	1.65941	0.191213	-0.718482	122.018	2.08643	2.90393	0.100399	-0.998272	493.622	2.69339	2.69806	0.0565054	-1.24791	119.067	2.07579	1.66341						0.313098	-0.504319	21.5121	1.33268	2.64254	0.0837318	-1.07711	90.0493	1.95448	1.81456
0.149465	-0.82546	26.8117	1.42832	1.73034	0.0597723	-1.2235	294.087	2.46848	2.01755	0.0742947	-1.12904	163.641	2.21389	1.96086	0.0974134	-1.01138	53.7507	1.73038	1.71091	0.117416	-0.930272	302.182	2.48027	2.66618	0.169355	-0.771203	71.3319	1.85328	2.40311	0.0594874	-1.22557	92.4772	1.96603	1.60417						0.154502	-0.811065	204.39	2.31046	2.84867	0.0825129	-1.08348	108.197	2.03421	1.87748
0.152253	-0.817434	35.1973	1.54651	1.89191	0.0724722	-1.13983	235.66	2.37229	2.08127	0.0880006	-1.05551	152.828	2.1842	2.06933	0.0398774	-1.39927	207.042	2.31606	1.65519	0.17076	-0.767614	177.939	2.25027	2.93151	0.132752	-0.87696	114.59	2.05915	2.34805	0.104178	-0.982225	80.7793	1.9073	1.94182						0.18328	-0.736884	82.593	1.91694	2.60142	0.0553073	-1.25722	361.679	2.55832	2.03491
0.130524	-0.884309	29.7663	1.47373	1.66653	0.0549439	-1.26008	337.006	2.52764	2.00593	0.0818343	-1.08706	176.104	2.24577	2.0659	0.0891495	-1.04988	56.201	1.74974	1.66661	0.1577	-0.802169	138.211	2.14054	2.66844	0.194213	-0.711721	98.0889	1.99162	2.79832	0.0662892	-1.17856	126.095	2.1007	1.78243						0.273921	-0.562375	28.1299	1.44917	2.57687	0.0696075	-1.15734	159.318	2.20226	1.90286
0.164736	-0.783211	28.7986	1.45937	1.86332	0.0663124	-1.17841	305.61	2.48517	2.10892	0.12445	-0.905006	52.9574	1.72393	1.90488	0.0601959	-1.22043	111.692	2.04802	1.67811	0.193244	-0.713893	91.0171	1.95912	2.74428	0.273576	-0.562922	13.6592	1.13542	2.01702	0.0673767	-1.17149	111.474	2.04718	1.7475						0.373979	-0.427152	18.8633	1.27562	2.98633	0.0650337	-1.18686	228.782	2.35942	1.98795
0.129943	-0.886248	43.2814	1.6363	1.84632	0.109857	-0.959172	84.5806	1.92727	2.00931	0.0874283	-1.05835	109.418	2.03909	1.92667	0.0869574	-1.06069	49.7769	1.69703	1.59992	0.184593	-0.733785	136.683	2.13571	2.91054	0.213682	-0.670231	59.9077	1.77748	2.65204	0.102048	-0.991195	41.9476	1.62271	1.63712						0.288755	-0.53947	46.4302	1.6668	3.0897	0.0931149	-1.03098	96.3679	1.98393	1.92432
0.113688	-0.944284	54.7239	1.73818	1.84073	0.058817	-1.2305	398.742	2.60069	2.11353	0.0858787	-1.06611	169.322	2.22871	2.0905	0.0961911	-1.01687	45.5333	1.65833	1.63082	0.196877	-0.705806	121.892	2.08597	2.95545	0.21649	-0.664563	93.3885	1.97029	2.9648	0.0505664	-1.29614	196.979	2.29442	1.7702						0.198988	-0.701173	109.299	2.03862	2.90743	0.0575568	-1.2399	258.779	2.41293	1.94606
0.103826	-0.983694	58.7758	1.7692	1.79853	0.0784941	-1.10516	210.422	2.32309	2.10203	0.10769	-0.967826	75.1908	1.87616	1.93853	0.065163	-1.186	87.426	1.94164	1.63714	0.199809	-0.699384	123.459	2.09152	2.99052	0.177598	-0.750563	119.078	2.07583	2.7657	0.0606827	-1.21693	128.158	2.10774	1.73201						0.265238	-0.576365	30.9707	1.49095	2.58682	0.0740453	-1.1305	139.79	2.14548	1.89781
0.142297	-0.846804	25.8876	1.41309	1.66874	0.0957648	-1.01879	141.468	2.15066	2.11098	0.100438	-0.9981	80.8679	1.90778	1.91141	0.109818	-0.959328	37.5232	1.5743	1.64104	0.21356	-0.670479	78.3865	1.89424	2.8252	0.165696	-0.780688	94.2571	1.97431	2.52894	0.0762859	-1.11756	119.721	2.07817	1.85957						0.170856	-0.767369	116.448	2.06613	2.69249	0.104644	-0.980285	73.398	1.86568	1.90321
0.19065	-0.719764	16.1828	1.20905	1.67979	0.0956228	-1.01944	113.679	2.05568	2.01648	0.0993439	-1.00286	92.562	1.96643	1.96083	0.0824477	-1.08382	54.7162	1.73812	1.60369	0.175644	-0.755368	123.235	2.09073	2.76784	0.204661	-0.688965	41.0011	1.6128	2.3409	0.132925	-0.876395	22.5107	1.35239	1.54313						0.144429	-0.840344	166.649	2.2218	2.64392	0.143555	-0.842981	34.8265	1.54191	1.82911
0.0912359	-1.03983	64.0656	1.80662	1.73742	0.0783212	-1.10612	159.968	2.20403	1.99258	0.120989	-0.917254	69.5105	1.84205	2.00822	0.126078	-0.899359	30.5537	1.48506	1.65125	0.134601	-0.870951	257.31	2.41046	2.76762	0.157366	-0.803089	44.894	1.65219	2.05729	0.0988767	-1.00491	30.5005	1.48431	1.47706						0.296459	-0.528035	19.3989	1.28778	2.43881	0.108444	-0.964793	63.9183	1.80563	1.87152
0.110271	-0.957541	45.5117	1.65812	1.73165	0.0689794	-1.16128	242.409	2.38455	2.05338	0.0915897	-1.03815	119.005	2.07556	1.99929	0.0816358	-1.08812	57.7309	1.76141	1.61876	0.237066	-0.62513	50.0059	1.69902	2.71787	0.306764	-0.513195	22.7433	1.35685	2.64393	0.0651487	-1.18609	94.0499	1.97336	1.66374						0.229759	-0.638728	76.2048	1.88198	2.94645	0.09292	-1.03189	98.3658	1.99284	1.93125
0.112273	-0.949726	38.0741	1.58063	1.6643	0.086291	-1.06403	184.121	2.2651	2.12879	0.102846	-0.987812	71.7861	1.85604	1.87894	0.080767	-1.09277	55.481	1.74414	1.59608	0.178084	-0.749374	164.477	2.21611	2.95728	0.150098	-0.823625	193.443	2.28655	2.77621	0.085328	-1.06891	114.253	2.05787	1.9252						0.21808	-0.661385	49.8674	1.69782	2.56706	0.0996505	-1.00152	105.229	2.02213	2.01906
0.129808	-0.886697	38.1955	1.58201	1.78416	0.051256	-1.29026	671.22	2.82687	2.19093	0.0869444	-1.06076	111.525	2.04737	1.9301	0.0781774	-1.10692	75.5646	1.87832	1.69689	0.222373	-0.652917	120.148	2.07972	3.18527	0.239679	-0.62037	56.4155	1.7514	2.82315	0.0617863	-1.20911	73.4999	1.86629	1.54352						0.300077	-0.522767	32.1029	1.50654	2.88186	0.0691898	-1.15996	185.681	2.26877	1.95591
0.134671	-0.870727	37.3819	1.57266	1.80615	0.0752429	-1.12353	159.657	2.20319	1.96094	0.0770772	-1.11307	166.084	2.22033	1.99477	0.0947228	-1.02355	53.5615	1.72885	1.68908	0.168879	-0.772425	119.55	2.07755	2.68965	0.177817	-0.750026	67.0365	1.82631	2.435	0.0423496	-1.37315	85.0755	1.9298	1.40538						0.180696	-0.743051	89.5494	1.95206	2.62709	0.119707	-0.921881	61.0582	1.78574	1.93707
0.117883	-0.928551	29.021	1.46271	1.57526	0.0778118	-1.10895	182.571	2.26143	2.03925	0.072223	-1.14132	198.089	2.29686	2.01245	0.0808261	-1.09245	64.2144	1.80763	1.65466	0.197952	-0.70344	93.2739	1.96976	2.80018	0.286071	-0.543526	46.4417	1.66691	3.06684	0.0666402	-1.17626	67.272	1.82783	1.55393						0.198632	-0.701951	55.4124	1.74361	2.48394	0.124512	-0.904788	57.2131	1.7575	1.94244
0.133836	-0.873428	19.5666	1.29151	1.47867	0.100696	-0.996986	123.968	2.09331	2.09964	0.0731099	-1.13602	168.379	2.22629	1.95972	0.055646	-1.25457	105.886	2.02484	1.61397	0.261217	-0.582999	62.9449	1.79896	3.0857	0.246242	-0.608637	41.3348	1.61632	2.65563	0.0747555	-1.12636	55.2392	1.74225	1.5468						0.152775	-0.815948	269.549	2.43064	2.97891	0.115237	-0.938408	66.7175	1.82424	1.94397
0.212413	-0.67282	13.6304	1.13451	1.6862	0.117102	-0.931437	90.5023	1.95666	2.10069	0.0728094	-1.13781	161.801	2.20898	1.94143	0.0885186	-1.05297	53.4579	1.72801	1.64109	0.220009	-0.657559	64.8679	1.81203	2.75569	0.150144	-0.823493	164.387	2.21587	2.69082	0.0763926	-1.11695	94.7256	1.97647	1.76952						0.164076	-0.784955	102.879	2.01233	2.56362	0.145527	-0.837057	33.3951	1.52368	1.82028
0.194436	-0.711224	15.5956	1.193	1.67739	0.0819848	-1.08627	177.676	2.24963	2.07097	0.111602	-0.952329	64.0055	1.80622	1.89663	0.112386	-0.949289	34.8779	1.54255	1.62495	0.304718	-0.516102	47.3632	1.67544	3.24634	0.191838	-0.717065	68.3639	1.83483	2.5588	0.0543472	-1.26482	166.736	2.22203	1.75679						0.274452	-0.561534	43.7278	1.64076	2.92192	0.114852	-0.939861	82.4649	1.91627	2.03889
0.152836	-0.815773	25.7265	1.41038	1.72889	0.0628426	-1.20175	329.136	2.51738	2.09477	0.0701639	-1.15389	217.289	2.33704	2.02536	0.140076	-0.853638	34.5385	1.5383	1.80206	0.206591	-0.684889	74.3201	1.87111	2.73198	0.130942	-0.882921	359.662	2.55589	2.89482	0.0582479	-1.23472	126.965	2.10369	1.70378						0.262547	-0.580793	35.2898	1.54765	2.66472	0.207579	-0.682817	19.6432	1.29321	1.89394
0.155783	-0.807481	22.1409	1.3452	1.66592	0.0597511	-1.22365	442.669	2.64608	2.16244	0.0583264	-1.23413	270.517	2.43219	1.97077	0.0710569	-1.14839	89.3813	1.95125	1.69911	0.139989	-0.853906	398.246	2.60015	3.04501	0.216466	-0.66461	53.9896	1.73231	2.60651	0.0555288	-1.25548	89.597	1.95229	1.55502						0.170481	-0.768325	138.857	2.14257	2.78862	0.173473	-0.760767	22.5991	1.35409	1.7799
0.145502	-0.837131	26.8752	1.42935	1.70744	0.087397	-1.0585	127.755	2.10638	1.98996	0.0829722	-1.08107	115.574	2.06286	1.90817	0.0726729	-1.13863	64.5092	1.80962	1.5893	0.179845	-0.745102	99.4419	1.99757	2.68094	0.174483	-0.758248	94.6424	1.97609	2.60612	0.0548201	-1.26106	123.631	2.09213	1.65902						0.283651	-0.547215	31.9263	1.50415	2.74873	0.182893	-0.737802	22.2884	1.34808	1.82716
0.125124	-0.90266	26.3088	1.4201	1.57324	0.0883033	-1.05402	161.288	2.2076	2.09445	0.0968222	-1.01402	103.107	2.01329	1.98544	0.0535695	-1.27108	101.578	2.0068	1.57881	0.279023	-0.55436	49.9003	1.6981	3.06317	0.132096	-0.879111	157.612	2.19759	2.49979	0.0614213	-1.21168	96.0594	1.98254	1.63619						0.177046	-0.751913	88.3624	1.94627	2.58842	0.142913	-0.844927	46.3767	1.6663	1.97212
0.106041	-0.974525	53.6773	1.72979	1.77501	0.0522275	-1.2821	423.051	2.62639	2.04851	0.105165	-0.978127	93.8606	1.97248	2.01659	0.0418678	-1.37812	155.288	2.19114	1.58995	0.254082	-0.595026	62.4478	1.79552	3.01754	0.227021	-0.643934	40.5583	1.60808	2.49727	0.0840172	-1.07563	88.7536	1.94819	1.8112						0.182777	-0.738078	84.4993	1.92685	2.61064	0.0904879	-1.04341	93.2932	1.96985	1.8879
0.139755	-0.854631	29.3672	1.46786	1.71754	0.115636	-0.936908	100.219	2.00095	2.13569	0.11832	-0.926941	85.5188	1.93206	2.08434	0.0616082	-1.21036	119.871	2.07871	1.71743	0.265	-0.576754	46.7778	1.67004	2.89558	0.157203	-0.803538	74.5802	1.87262	2.33047	0.0731165	-1.13598	67.1387	1.82697	1.60827						0.258387	-0.587729	32.2346	1.50832	2.56636	0.12701	-0.896162	60.9187	1.78475	1.99155
0.116198	-0.934803	35.6489	1.55205	1.66029	0.10815	-0.965974	89.947	1.95399	2.02281	0.0803772	-1.09487	152.526	2.18334	1.99416	0.0823185	-1.0845	68.7512	1.83728	1.69412	0.116677	-0.933016	406.118	2.60865	2.79594	0.157634	-0.802349	171.376	2.23395	2.78426	0.0788333	-1.10329	58.5049	1.76719	1.60175						0.300566	-0.52206	24.9927	1.39781	2.67749	0.106376	-0.973158	88.2814	1.94587	1.99954
0.118943	-0.924661	36.7245	1.56496	1.69246	0.0762789	-1.1176	166.205	2.22064	1.98698	0.0994615	-1.00235	102.719	2.01165	2.00695	0.154633	-0.810699	22.332	1.34893	1.66391	0.17879	-0.747656	106.812	2.02862	2.71331	0.183398	-0.736605	70.5325	1.84839	2.50934	0.0617654	-1.20925	107.894	2.033	1.6812						0.210391	-0.676973	70.8996	1.85064	2.7337	0.0654451	-1.18412	325.732	2.51286	2.12213
0.152145	-0.817742	19.5733	1.29166	1.57955	0.0836275	-1.07765	140.513	2.14772	1.99296	0.10055	-0.997618	97.1002	1.98722	1.99197	0.0828988	-1.08145	54.6666	1.73772	1.60684	0.274202	-0.561929	36.075	1.55721	2.77118	0.197631	-0.704145	56.8351	1.75462	2.49184	0.0922388	-1.03509	70.0958	1.84569	1.78313											0.0851166	-1.06999	123.405	2.09133	1.95454
0.16126	-0.792473	16.6007	1.22013	1.53964	0.0839483	-1.07599	174.299	2.24129	2.08301	0.0671379	-1.17303	204.631	2.31097	1.97008	0.110725	-0.955754	42.658	1.63	1.70546	0.194452	-0.711188	128.491	2.10887	2.96528	0.134618	-0.870898	144.989	2.16133	2.48173	0.0686239	-1.16352	166.579	2.22162	1.90939											0.116573	-0.933402	86.6148	1.93759	2.07584
0.182887	-0.737817	19.5103	1.29026	1.74876	0.0781137	-1.10727	194.681	2.28932	2.06753	0.08166	-1.08799	139.435	2.14437	1.97095	0.147673	-0.830699	14.3493	1.15683	1.3926	0.173427	-0.760884	125.937	2.10015	2.76015	0.205608	-0.686961	36.8653	1.56662	2.28051	0.0646505	-1.18943	164.193	2.21536	1.86254											0.125314	-0.902	26.3955	1.42153	1.57598
0.20528	-0.687653	17.8842	1.25247	1.82137	0.0849475	-1.07085	92.8399	1.96773	1.83755	0.0626138	-1.20333	222.228	2.3468	1.95025	0.101713	-0.992622	44.7903	1.65118	1.66346	0.201881	-0.694904	76.8579	1.88569	2.7136	0.191109	-0.718719	116.143	2.06499	2.87316	0.125733	-0.900551	27.2404	1.43521	1.59371											0.129226	-0.88865	53.3197	1.72689	1.94327
0.187669	-0.726608	14.5868	1.16396	1.60191	0.079541	-1.09941	166.753	2.22207	2.02115	0.0638622	-1.19476	209.636	2.32147	1.94305	0.110742	-0.955689	31.337	1.49606	1.56542	0.15448	-0.811129	235.257	2.37154	2.92376	0.23587	-0.627328	39.2156	1.59346	2.54007	0.0607668	-1.21633	121.413	2.08426	1.71356											0.158187	-0.800828	30.7725	1.48816	1.85828
0.111688	-0.951995	36.4493	1.56169	1.64044	0.0667073	-1.17583	244.59	2.38844	2.03129	0.0787492	-1.10375	167.707	2.22455	2.01544	0.0493446	-1.30676	149.961	2.17598	1.66517	0.0807869	-1.09266	924.48	2.9659	2.71439	0.132732	-0.877023	307.453	2.48778	2.83662	0.0549618	-1.25994	115.063	2.06094	1.63574											0.0926492	-1.03316	89.4835	1.95174	1.8891
0.140677	-0.851775	26.2522	1.41916	1.66613	0.0746129	-1.12719	199.277	2.29946	2.04	0.086756	-1.0617	127.922	2.10694	1.9845	0.106931	-0.970895	44.0791	1.64423	1.69352	0.199523	-0.700007	80.3137	1.90479	2.7211	0.187092	-0.727944	50.5876	1.70404	2.3409	0.0763569	-1.11715	63.6817	1.80401	1.61483											0.0563925	-1.24878	243.756	2.38696	1.91143
0.13044	-0.884589	37.7089	1.57644	1.78212	0.0729413	-1.13703	191.125	2.28132	2.00639	0.0662779	-1.17863	191.115	2.28129	1.93554	0.0597692	-1.22352	97.5808	1.98936	1.62593	0.14761	-0.830883	267.576	2.42745	2.92153	0.217397	-0.662746	76.1847	1.88187	2.8395	0.0555698	-1.25516	63.6493	1.80379	1.4371											0.12488	-0.903508	42.652	1.62994	1.80401
0.132452	-0.877943	29.1868	1.46519	1.66889	0.102989	-0.987209	108.622	2.03592	2.0623	0.117845	-0.928689	63.0713	1.79983	1.93804	0.0639694	-1.19403	97.9239	1.99089	1.66737	0.197295	-0.704883	107.858	2.03285	2.88395	0.130169	-0.885493	115.457	2.06242	2.32912	0.0589048	-1.22985	141.19	2.1498	1.74802											0.0756696	-1.12108	148.177	2.17078	1.93633
0.114395	-0.941595	33.4334	1.52418	1.61872	0.100032	-0.999859	104.044	2.01722	2.0175	0.100005	-0.999978	97.7363	1.99006	1.9901	0.0638157	-1.19507	75.6622	1.87888	1.57219	0.200352	-0.698207	78.7733	1.89638	2.71607	0.148738	-0.827577	182.094	2.2603	2.73122	0.0464084	-1.3334	316.161	2.49991	1.87483											0.0714043	-1.14628	249.013	2.39622	2.09044
0.108662	-0.963924	50.9752	1.70736	1.77126	0.0771384	-1.11273	306.428	2.48633	2.23444	0.109817	-0.959329	77.6334	1.89005	1.97018	0.0727934	-1.13791	71.1254	1.85202	1.62757	0.143873	-0.842019	285.625	2.4558	2.91656	0.210705	-0.676325	60.841	1.7842	2.63807	0.0608669	-1.21562	100.229	2.001	1.64607											0.0874197	-1.05839	93.655	1.97153	1.86276
0.145982	-0.835701	33.6318	1.52675	1.82691	0.0686024	-1.16366	206.518	2.31496	1.98938	0.0562688	-1.24973	353.914	2.5489	2.03955	0.0690911	-1.16058	74.2864	1.87091	1.61205	0.138796	-0.857623	263.484	2.42075	2.82263	0.198408	-0.70244	31.0341	1.49184	2.1238	0.0831374	-1.0802	89.2038	1.95038	1.80557											0.0747579	-1.12634	95.2574	1.9789	1.75692
0.174171	-0.759024	17.0173	1.23089	1.62168	0.0789746	-1.10251	199.469	2.29987	2.08603	0.0759132	-1.11968	167.528	2.22409	1.98636	0.0691952	-1.15992	67.4474	1.82897	1.5768	0.145976	-0.835718	130.409	2.11531	2.53113	0.150759	-0.821715	65.7228	1.81772	2.2121	0.0563137	-1.24939	142.178	2.15283	1.72311											0.0920712	-1.03588	94.5763	1.97578	1.90735
0.175979	-0.75454	26.2382	1.41893	1.88053	0.0801749	-1.09596	244.13	2.38762	2.17856	0.0906519	-1.04262	126.33	2.10151	2.0156	0.0658771	-1.18127	89.3068	1.95088	1.65152	0.137568	-0.861483	177.975	2.25036	2.61219	0.204479	-0.689351	61.5591	1.78929	2.59562	0.0591295	-1.2282	184.004	2.26483	1.84403											0.0956926	-1.01912	107.433	2.03114	1.99303
0.136334	-0.865395	23.4044	1.3693	1.58228	0.0744765	-1.12798	222.327	2.34699	2.0807	0.0809374	-1.09185	169.585	2.22939	2.04184	0.103151	-0.986528	36.6377	1.56393	1.58528	0.121726	-0.914617	342.005	2.53403	2.77059	0.204641	-0.689007	100.419	2.00182	2.90536	0.0405369	-1.39215	208.974	2.32009	1.66655											0.0567816	-1.24579	277.598	2.44342	1.96134
0.0977179	-1.01003	50.9998	1.70757	1.69062	0.0817124	-1.08771	114.618	2.05925	1.8932	0.0877943	-1.05653	109.5	2.03941	1.93029	0.0898781	-1.04635	71.9784	1.8572	1.77494	0.234506	-0.629846	54.5695	1.73695	2.75774	0.126039	-0.899496	100.269	2.00117	2.22477	0.0960917	-1.01731	48.8059	1.68847	1.65973											0.0560464	-1.25145	204.027	2.30969	1.8456
0.0954876	-1.02005	67.0074	1.82612	1.79022	0.103711	-0.984175	152.783	2.18407	2.21919	0.0619884	-1.20769	192.98	2.28551	1.89247	0.059837	-1.22303	111.379	2.0468	1.67355	0.128809	-0.890053	256.157	2.40851	2.70603	0.16738	-0.776296	129.516	2.11232	2.72103	0.0688428	-1.16214	120.02	2.07925	1.78916											0.125152	-0.902562	58.8532	1.76977	1.96083
0.125937	-0.899848	37.1854	1.57037	1.74515	0.120918	-0.917508	86.581	1.93742	2.11161	0.0698302	-1.15596	204	2.30963	1.99802	0.118066	-0.927876	42.328	1.62663	1.75307	0.109433	-0.960852	604.382	2.78131	2.89463	0.188771	-0.724064	52.6254	1.7212	2.37713	0.0592733	-1.22714	122.468	2.08802	1.70153											0.122307	-0.912548	49.0339	1.6905	1.8525
0.0941535	-1.02616	60.255	1.77999	1.73461	0.111906	-0.951147	115.174	2.06135	2.16723	0.081633	-1.08813	180.766	2.25712	2.0743	0.0745637	-1.12747	48.8461	1.68883	1.49789	0.120643	-0.918496	438.109	2.64158	2.87599	0.308609	-0.510591	11.8685	1.07439	2.10422	0.137235	-0.862534	20.2055	1.30547	1.51353											0.174747	-0.757589	24.7892	1.39426	1.84039
0.137261	-0.862453	31.5067	1.4984	1.73737	0.0698798	-1.15565	265.291	2.42372	2.09728	0.0953926	-1.02049	89.0622	1.94969	1.91055	0.064494	-1.19048	93.1987	1.96941	1.6543	0.15251	-0.816701	245.749	2.39049	2.92701	0.19275	-0.715006	195.07	2.29019	3.20304	0.108497	-0.964581	36.9489	1.5676	1.62516											0.06272	-1.20259	210.461	2.32317	1.9318
0.10717	-0.969929	34.86	1.54233	1.59015	0.0639852	-1.19392	307.808	2.48828	2.08413	0.0676608	-1.16966	207.601	2.31723	1.98111	0.0539076	-1.26835	171.97	2.23545	1.76249	0.177037	-0.751936	101.294	2.00558	2.66723	0.211398	-0.674899	55.1971	1.74192	2.581	0.0708856	-1.14944	72.2943	1.8591	1.6174											0.0669775	-1.17407	190.81	2.2806	1.94247
0.129867	-0.8865	29.2502	1.46613	1.65384	0.0688825	-1.16189	213.287	2.32897	2.00446	0.0922754	-1.03491	109.27	2.0385	1.96973	0.0859451	-1.06578	89.1076	1.94991	1.82957	0.192141	-0.716379	129.165	2.11114	2.94696	0.169606	-0.770558	157.407	2.19702	2.85121	0.12332	-0.908968	26.5889	1.4247	1.56738											0.296296	-0.528274	8.80263	0.944612	1.78811
0.103539	-0.984897	49.6807	1.69619	1.7222	0.0760277	-1.11903	174.559	2.24194	2.00347	0.0967823	-1.0142	89.6783	1.95269	1.92534	0.0980336	-1.00863	63.7232	1.8043	1.78887	0.134741	-0.8705	278.613	2.445	2.80873	0.184775	-0.733356	62.6607	1.797	2.45037	0.0377608	-1.42296	244.64	2.38853	1.67857											0.0771773	-1.11251	146.005	2.16437	1.94548
0.143599	-0.84285	31.1556	1.49354	1.77201	0.0983698	-1.00714	133.758	2.12632	2.11125	0.078307	-1.1062	131.839	2.12005	1.91651	0.0741375	-1.12996	71.789	1.85606	1.64258	0.318897	-0.49635	27.0226	1.43173	2.88451	0.213973	-0.669641	59.6156	1.77536	2.65121	0.0486495	-1.31292	121.778	2.08557	1.5885											0.0807746	-1.09273	154.337	2.18847	2.00276
0.143125	-0.844284	25.7871	1.4114	1.67172	0.101835	-0.992101	98.6816	1.99424	2.01011	0.0902705	-1.04445	113.37	2.0545	1.96705	0.144077	-0.841404	33.2542	1.52185	1.8087	0.25279	-0.59724	65.316	1.81502	3.03901	0.121434	-0.91566	239.036	2.37846	2.59754	0.0666045	-1.1765	86.781	1.93842	1.64763											0.103748	-0.984019	66.6714	1.82394	1.85356
0.143927	-0.841857	32.1157	1.50672	1.78976	0.0739575	-1.13102	168.665	2.22702	1.96904	0.0755183	-1.12195	168.489	2.22657	1.98456	0.101598	-0.993115	37.7178	1.57655	1.58748	0.19457	-0.710925	95.6196	1.98055	2.78587	0.304839	-0.515929	16.9849	1.23006	2.38417	0.0444846	-1.35179	167.527	2.22409	1.64529											0.183805	-0.735644	25.0298	1.39846	1.901
0.158404	-0.800233	23.4178	1.36955	1.71144	0.110404	-0.957016	78.8513	1.89681	1.982	0.0832948	-1.07938	161.879	2.20919	2.04672	0.087668	-1.05716	72.0109	1.8574	1.75697	0.246701	-0.607829	49.1354	1.69139	2.78268	0.184227	-0.734646	41.6038	1.61913	2.20396	0.0816287	-1.08816	57.1415	1.75695	1.61461											0.109668	-0.959918	47.3288	1.67513	1.74507
0.115109	-0.93889	59.1556	1.772	1.88733	0.0844723	-1.07329	150.558	2.1777	2.02901	0.0942725	-1.02561	102.885	2.01235	1.96209	0.0650758	-1.18658	69.8807	1.84436	1.55435	0.194526	-0.711021	130.765	2.11649	2.97669	0.132492	-0.877812	152.038	2.18195	2.48567	0.071855	-1.14354	85.7656	1.93331	1.69063											0.0785872	-1.10465	209.243	2.32065	2.10081
0.146482	-0.834217	19.4158	1.28816	1.54415	0.0974068	-1.01141	130.432	2.11538	2.09152	0.120227	-0.919999	61.7445	1.7906	1.9463	0.0701031	-1.15426	91.7796	1.96275	1.70043	0.170543	-0.768166	153.039	2.1848	2.84418	0.27162	-0.566038	30.9697	1.49094	2.63399	0.0624656	-1.20436	143.072	2.15556	1.78979											0.0624199	-1.20468	256.91	2.40978	2.00035
0.0975587	-1.01073	49.7883	1.69713	1.6791	0.0606823	-1.21694	350.134	2.54423	2.09068	0.0809502	-1.09178	121.956	2.0862	1.91082	0.0774227	-1.11113	65.7753	1.81806	1.63623	0.249822	-0.602369	56.1203	1.74912	2.90373	0.155186	-0.809148	72.0319	1.85753	2.29565	0.0632861	-1.19869	71.6825	1.85541	1.54786											0.100996	-0.995696	66.5599	1.82321	1.83109
0.133899	-0.873222	30.6518	1.48646	1.70227	0.119986	-0.92087	64.8874	1.81216	1.96788	0.0730283	-1.13651	170.402	2.23148	1.96345	0.0516102	-1.28726	145.512	2.1629	1.68023	0.2287	-0.640734	85.4953	1.93194	3.0152	0.208977	-0.679901	150.241	2.17679	3.20163	0.0820246	-1.08606	56.7494	1.75396	1.61498											0.287221	-0.541784	12.2695	1.08883	2.0097
0.0853106	-1.069	63.8652	1.80526	1.68875	0.124707	-0.90411	92.0879	1.9642	2.17253	0.0814765	-1.08897	129.632	2.11271	1.9401	0.0636268	-1.19636	96.3701	1.98394	1.65832	0.174729	-0.757634	159.396	2.20248	2.90705	0.138271	-0.859268	133.416	2.12521	2.47328	0.127764	-0.89359	40.7255	1.60987	1.80157											0.177644	-0.750449	41.2834	1.61578	2.15308
0.104503	-0.980869	50.6839	1.70487	1.73812	0.0784483	-1.10542	188.823	2.27606	2.059	0.076687	-1.11528	170.736	2.23233	2.00159	0.0526199	-1.27885	111.034	2.04546	1.59945	0.200569	-0.697736	78.2868	1.89369	2.71405	0.173576	-0.76051	80.8792	1.90784	2.50863	0.0376982	-1.42368	443.475	2.64687	1.85918											0.201727	-0.695236	19.5921	1.29208	1.85848
0.102002	-0.99139	61.736	1.79054	1.80609	0.0921957	-1.03529	132.851	2.12337	2.05099	0.118458	-0.926436	64.6471	1.81055	1.95432	0.0963592	-1.01611	51.6721	1.71326	1.6861	0.182732	-0.738185	173.804	2.24006	3.03455	0.266762	-0.573876	36.8186	1.56607	2.72893	0.0607481	-1.21647	90.0075	1.95428	1.60652											0.108702	-0.963764	91.3205	1.96057	2.03428
0.129032	-0.889301	29.6408	1.47189	1.65511	0.0515631	-1.28766	442.08	2.6455	2.0545	0.0842512	-1.07442	126.814	2.10317	1.95748	0.0987334	-1.00554	39.9172	1.60116	1.59235	0.242393	-0.615479	52.2324	1.71794	2.79122	0.142082	-0.847461	88.1612	1.94528	2.29542	0.0981168	-1.00826	41.2078	1.61498	1.60175											0.0819762	-1.08631	117.36	2.06952	1.90509
0.120556	-0.918811	31.9218	1.50409	1.63699	0.0843589	-1.07387	155.98	2.19307	2.04221	0.117612	-0.92955	78.403	1.89433	2.0379	0.123932	-0.906815	26.4859	1.42301	1.56924	0.181082	-0.742124	192.887	2.2853	3.07941	0.14875	-0.827542	125.029	2.09701	2.53402	0.0446523	-1.35016	279.038	2.44566	1.81139											0.0916393	-1.03792	91.8564	1.96311	1.89139
0.155269	-0.808916	23.7274	1.37525	1.70012	0.0744406	-1.12819	223.324	2.34894	2.08204	0.0724632	-1.13988	225.566	2.35327	2.06449	0.0629169	-1.20123	82.8151	1.91811	1.59678	0.139611	-0.85508	211.932	2.3262	2.72044	0.185909	-0.730699	55.4251	1.74371	2.38635	0.043134	-1.36518	229.888	2.36152	1.72982											0.233392	-0.631913	21.8534	1.33952	2.11978
0.136222	-0.865752	42.9012	1.63247	1.88561	0.116251	-0.934605	53.3902	1.72746	1.84833	0.0843313	-1.07401	148.366	2.17133	2.0217	0.086095	-1.06502	67.0107	1.82614	1.71465	0.20672	-0.684617	81.9955	1.91379	2.79542	0.15954	-0.797132	166.974	2.22265	2.78831	0.0705873	-1.15127	89.1786	1.95026	1.694											0.0938086	-1.02776	101.309	2.00565	1.95148
0.119342	-0.923206	30.2825	1.48119	1.6044	0.0986307	-1.00599	117.253	2.06912	2.05681	0.0762277	-1.11789	180.225	2.25582	2.01793	0.120408	-0.919345	47.6966	1.67849	1.82574	0.153281	-0.814511	161.146	2.20722	2.70987	0.171137	-0.766655	99.8661	1.99942	2.60798	0.0854897	-1.06809	93.5207	1.97091	1.84527											0.091592	-1.03814	119.938	2.07896	2.00257
0.117089	-0.931484	45.1305	1.65447	1.77617	0.115175	-0.938641	87.0142	1.93959	2.06638	0.0829345	-1.08126	137.871	2.13947	1.97868	0.0661212	-1.17966	115.254	2.06165	1.74767	0.161847	-0.790894	230.263	2.36222	2.98678	0.191948	-0.716816	49.6825	1.6962	2.3663	0.0746036	-1.12724	85.8006	1.93349	1.71524											0.232399	-0.633766	17.923	1.25341	1.97772
0.10426	-0.981884	46.4379	1.66687	1.69763	0.0861937	-1.06452	99.083	1.996	1.87501	0.0759626	-1.1194	129.83	2.11337	1.88795	0.0944179	-1.02495	44.2668	1.64608	1.60602	0.159014	-0.798565	144.618	2.16022	2.70513	0.163425	-0.786682	97.5812	1.98937	2.52881	0.0594556	-1.22581	112.447	2.05095	1.67314											0.128205	-0.892095	66.9007	1.82543	2.04623
0.12513	-0.902637	38.1999	1.58206	1.75271	0.0930626	-1.03122	145.662	2.16335	2.09784	0.08471	-1.07207	162.092	2.20976	2.06122	0.0758755	-1.1199	73.1989	1.8645	1.66489	0.151771	-0.818812	147.119	2.16767	2.64733	0.213191	-0.671231	40.075	1.60287	2.38796	0.0646607	-1.18936	139.073	2.14324	1.80201											0.0991078	-1.00389	81.4631	1.91096	1.90355
0.166969	-0.777363	18.2821	1.26203	1.62347	0.116899	-0.93219	74.113	1.86989	2.00592	0.0750118	-1.12487	133.425	2.12524	1.88932	0.0829048	-1.08142	54.9305	1.73981	1.60882	0.132356	-0.878257	244.463	2.38821	2.71926	0.179283	-0.74646	92.4214	1.96577	2.63346	0.0675543	-1.17035	55.2664	1.74246	1.48884											0.0742952	-1.12904	178.186	2.25087	1.99362
0.202688	-0.693172	13.0913	1.11698	1.61141	0.078734	-1.10384	191.645	2.2825	2.06778	0.103146	-0.986548	85.0607	1.92973	1.95604	0.0969238	-1.01357	40.9574	1.61233	1.59075	0.173594	-0.760466	136.821	2.13615	2.809	0.156028	-0.806799	58.6394	1.76819	2.19161	0.0699573	-1.15517	55.8474	1.747	1.51234											0.137973	-0.860204	49.3407	1.69321	1.96838
0.14444	-0.840311	23.0866	1.36336	1.62245	0.0852242	-1.06944	135.561	2.13214	1.9937	0.100015	-0.999933	112.378	2.05068	2.05082	0.0875463	-1.05776	57.7637	1.76166	1.66545	0.216751	-0.664039	99.9775	1.9999	3.01172	0.14446	-0.840252	107.794	2.03259	2.41903	0.0707767	-1.15011	103.852	2.01642	1.75324											0.123091	-0.909772	44.8213	1.65148	1.81527
0.106085	-0.974344	46.2551	1.66516	1.70901	0.0744265	-1.12827	205.593	2.31301	2.05004	0.0824392	-1.08387	131.584	2.1192	1.95523	0.0784669	-1.10531	88.3555	1.94623	1.7608	0.297288	-0.526823	43.256	1.63605	3.1055	0.215133	-0.667294	48.083	1.68199	2.52062	0.0636911	-1.19592	150.551	2.17768	1.82093											0.108326	-0.965268	84.7583	1.92818	1.99756
0.162379	-0.789469	19.6534	1.29344	1.63836	0.0790606	-1.10204	185.294	2.26786	2.05788	0.0633971	-1.19793	282.532	2.45107	2.04608	0.0899395	-1.04605	44.2334	1.64575	1.5733	0.173872	-0.75977	145.505	2.16288	2.84676	0.225909	-0.646066	77.3917	1.88869	2.92338	0.127502	-0.894482	35.2076	1.54664	1.72909											0.13007	-0.885822	46.8192	1.67042	1.88573
0.0924293	-1.03419	55.972	1.74797	1.69018	0.0992507	-1.00327	106.792	2.02854	2.02194	0.0978647	-1.00937	81.8856	1.91321	1.89544	0.0536687	-1.27028	151.874	2.18148	1.71733	0.213182	-0.671249	112.717	2.05199	3.05697	0.203997	-0.690375	25.6115	1.40843	2.0401	0.072074	-1.14222	133.528	2.12557	1.86091											0.174892	-0.75723	29.3509	1.46762	1.93814
0.160271	-0.795146	22.5947	1.35401	1.70284	0.0798112	-1.09794	274.678	2.43882	2.22128	0.0824692	-1.08371	147.899	2.16996	2.00235	0.0401222	-1.39661	213.347	2.32909	1.66767	0.147023	-0.832614	331.075	2.51993	3.02652	0.0861556	-1.06472	583.286	2.76588	2.59776	0.0507944	-1.29418	158.436	2.19986	1.6998											0.120476	-0.919098	82.998	1.91907	2.08799
0.13808	-0.85987	39.433	1.59586	1.85593	0.0702677	-1.15324	211.247	2.32479	2.01587	0.117705	-0.929203	53.4504	1.72795	1.8596	0.068939	-1.16153	86.4769	1.9369	1.66754	0.167566	-0.775813	129.663	2.11281	2.72335	0.130655	-0.883874	99.8016	1.99914	2.26179	0.0605378	-1.21797	72.3594	1.85949	1.52671											0.0703099	-1.15298	140.032	2.14623	1.86145
0.13596	-0.86659	24.8945	1.3961	1.61103	0.0848336	-1.07143	148.582	2.17197	2.02716	0.0848577	-1.07131	164.523	2.21623	2.06871	0.0995983	-1.00175	42.6284	1.6297	1.62685	0.227107	-0.64377	88.1436	1.94519	3.02156	0.205183	-0.687858	70.2769	1.84681	2.68487	0.0608623	-1.21565	87.7937	1.94346	1.5987											0.17221	-0.763942	20.0398	1.30189	1.70418
0.147396	-0.831513	25.1126	1.39989	1.68355	0.131044	-0.882583	84.7277	1.92803	2.18453	0.0964453	-1.01572	108.105	2.03385	2.00237	0.119023	-0.924368	40.3521	1.60587	1.73726	0.180577	-0.743338	154.528	2.18901	2.94483	0.189869	-0.721546	30.5408	1.48488	2.05791	0.0523605	-1.281	129.961	2.11381	1.65013											0.0961521	-1.01704	65.4858	1.81615	1.78572
0.221002	-0.655603	12.9564	1.11248	1.69688	0.0667922	-1.17527	396.605	2.59836	2.21085	0.0790085	-1.10233	146.311	2.16528	1.96428	0.10023	-0.999003	45.4429	1.65747	1.65912	0.262052	-0.581612	40.9486	1.61224	2.77202	0.143327	-0.843673	99.1187	1.99616	2.36603	0.121696	-0.914722	26.3505	1.42079	1.55325											0.225253	-0.647329	18.6739	1.27124	1.96382
0.117249	-0.930891	50.9431	1.70709	1.83382	0.0982964	-1.00746	157.625	2.19762	2.18135	0.092048	-1.03599	122.437	2.08791	2.01539	0.0735854	-1.13321	77.7895	1.89092	1.66864	0.128841	-0.889947	285.637	2.45581	2.75951	0.227557	-0.64291	95.21	1.97868	3.0777	0.0407682	-1.38968	148.954	2.17305	1.56371											0.0552363	-1.25778	333.785	2.52347	2.00629
0.0953068	-1.02088	43.958	1.64304	1.60944	0.0898656	-1.04641	158.648	2.20043	2.10285	0.106183	-0.973943	84.3977	1.92633	1.97787	0.0841818	-1.07478	44.442	1.64779	1.53314	0.193398	-0.713549	107.283	2.03053	2.84568	0.192924	-0.714613	94.0864	1.97353	2.76167	0.0689501	-1.16146	88.8234	1.94853	1.67765											0.0804692	-1.09437	162.27	2.21024	2.01964
0.0756824	-1.12101	52.3709	1.71909	1.53353	0.0598867	-1.22267	424.375	2.62775	2.14919	0.0807967	-1.09261	118.513	2.07377	1.898	0.0919789	-1.03631	51.1973	1.70925	1.64936	0.212945	-0.671733	82.32	1.91551	2.85159	0.205046	-0.688149	71.1029	1.85189	2.69111	0.0792747	-1.10087	113.737	2.0559	1.86753											0.0558574	-1.25292	431.115	2.63459	2.10276
0.192711	-0.715094	11.3765	1.05601	1.47674	0.109315	-0.96132	74.4434	1.87183	1.94714	0.0742506	-1.1293	182.605	2.26151	2.00258	0.0615116	-1.21104	100.223	2.00097	1.65227	0.186886	-0.728424	95.1224	1.97828	2.71584	0.263917	-0.578532	31.4115	1.49709	2.58774	0.0338597	-1.47032	165.966	2.22002	1.50989											0.067672	-1.16959	157.803	2.19811	1.87939
0.127898	-0.893137	30.6773	1.48682	1.66471	0.104385	-0.981362	114.968	2.06058	2.09971	0.108318	-0.9653	84.8124	1.92846	1.99778	0.0624873	-1.20421	120.386	2.08058	1.72775	0.223534	-0.650656	65.359	1.81531	2.78996	0.172424	-0.763402	180.474	2.25641	2.95573	0.0939805	-1.02696	71.33	1.85327	1.80462											0.0530442	-1.27536	312.415	2.49473	1.9561
0.180197	-0.744253	19.7615	1.29582	1.7411	0.0920245	-1.0361	125.035	2.09703	2.02397	0.0947374	-1.02348	114.352	2.05824	2.01103	0.0898984	-1.04625	63.7564	1.80452	1.72476	0.212808	-0.672012	94.9791	1.97763	2.94285	0.1811	-0.742082	54.9152	1.73969	2.34434	0.0660754	-1.17996	82.0234	1.91394	1.62204											0.155875	-0.807225	51.5356	1.71211	2.12098
0.212872	-0.671881	13.6281	1.13444	1.68845	0.0814658	-1.08902	262.809	2.41964	2.22184	0.0831264	-1.08026	111.253	2.04631	1.89428	0.0761137	-1.11854	101.287	2.00555	1.79301	0.173704	-0.760191	137.076	2.13696	2.81109	0.165682	-0.780725	59.6939	1.77593	2.27472	0.0599597	-1.22214	136.31	2.13453	1.74655											0.0755627	-1.12169	154.967	2.19024	1.95262
0.124152	-0.906046	38.7019	1.58773	1.75237	0.0757591	-1.12057	255.387	2.4072	2.1482	0.109429	-0.960867	71.3291	1.85327	1.92875	0.0648023	-1.18841	85.8826	1.93391	1.62731	0.146174	-0.83513	194.971	2.28997	2.74205	0.214942	-0.667678	16.1268	1.20755	1.80858	0.0634543	-1.19754	44.9555	1.65278	1.38015											0.0581091	-1.23576	351.349	2.54574	2.06007
0.213727	-0.67014	9.63009	0.98363	1.4678	0.0774729	-1.11085	199.566	2.30009	2.07056	0.0960202	-1.01764	84.7015	1.92789	1.89448	0.0755641	-1.12168	58.8056	1.76942	1.57747	0.166903	-0.777535	151.611	2.18073	2.80467	0.227663	-0.642707	76.4609	1.88344	2.93048	0.0485299	-1.31399	252.004	2.40141	1.82757											0.052628	-1.27878	329.097	2.51732	1.96853
0.158352	-0.800377	17.3588	1.23952	1.54867	0.0637927	-1.19523	239.776	2.37981	1.99109	0.089003	-1.0506	100.628	2.00272	1.90627	0.149209	-0.826204	24.6273	1.39142	1.68411	0.23014	-0.638008	68.1268	1.83332	2.8735	0.140904	-0.851076	232.738	2.36687	2.78103	0.0448159	-1.34857	328.431	2.51644	1.86601											0.107127	-0.970101	68.912	1.83829	1.89495
0.159575	-0.797035	19.322	1.28605	1.61355	0.0883917	-1.05359	181.492	2.25886	2.14397	0.0813847	-1.08946	151.578	2.18064	2.00158	0.0789695	-1.10254	80.7993	1.90741	1.73001	0.180685	-0.743078	70.1205	1.84584	2.48405	0.199724	-0.69957	56.0853	1.74885	2.49989	0.0626135	-1.20333	135.797	2.13289	1.77249											0.107843	-0.967208	70.9133	1.85073	1.91347
0.120405	-0.919357	47.0525	1.67258	1.8193	0.0772909	-1.11187	174.285	2.24126	2.01575	0.0849749	-1.07071	145.751	2.16361	2.02073	0.136853	-0.863746	31.0732	1.49239	1.72781	0.203174	-0.692132	122.963	2.08977	3.01933	0.251818	-0.598913	28.9162	1.46114	2.43966	0.0620477	-1.20727	152.401	2.18299	1.8082											0.12581	-0.900283	62.2269	1.79398	1.99268
0.106428	-0.972943	41.182	1.61471	1.65961	0.0977839	-1.00973	85.5205	1.93207	1.91345	0.0863875	-1.06355	114.495	2.05879	1.93577	0.077919	-1.10836	66.9044	1.82545	1.64699	0.155831	-0.807345	235.379	2.37177	2.93774	0.2123	-0.673051	53.4795	1.72819	2.56769	0.0576505	-1.2392	98.2703	1.99242	1.60783											0.0870376	-1.06029	126.42	2.10182	1.9823
0.108449	-0.964773	54.068	1.73294	1.79621	0.0421814	-1.37488	743.426	2.87124	2.08836	0.075957	-1.11943	137.825	2.13933	1.91108	0.145647	-0.836698	33.9154	1.5304	1.82909	0.238344	-0.622795	83.2907	1.9206	3.08383	0.149074	-0.826598	85.5153	1.93204	2.33734	0.0552611	-1.25758	144.534	2.15997	1.71756											0.0898327	-1.04657	178.022	2.25047	2.15034
0.142476	-0.846258	29.9861	1.47692	1.74524	0.0613274	-1.21235	392.938	2.59432	2.13992	0.108366	-0.965108	84.3503	1.92609	1.99572	0.0634028	-1.19789	69.4845	1.84189	1.53761	0.235607	-0.627813	58.6514	1.76828	2.81657	0.185784	-0.730992	129.872	2.11352	2.8913	0.0583225	-1.23416	136.575	2.13537	1.73022											0.108744	-0.963593	57.9047	1.76271	1.82931
0.15049	-0.822492	18.7008	1.27186	1.54635	0.114704	-0.940422	82.1282	1.91449	2.03578	0.0777005	-1.10958	173.245	2.23866	2.01758	0.101915	-0.991762	39.9107	1.60109	1.61439	0.240309	-0.61923	67.3952	1.82863	2.95307	0.16833	-0.773839	69.312	1.84081	2.3788	0.0523195	-1.28134	211.931	2.32619	1.81544											0.0587315	-1.23113	331.377	2.52032	2.04716
0.148523	-0.828206	19.8918	1.29867	1.56806	0.0773524	-1.11153	216.751	2.33596	2.10158	0.0722218	-1.14133	194.685	2.28933	2.00584	0.101155	-0.995013	46.542	1.66784	1.6762	0.241584	-0.616932	126.341	2.10154	3.40644	0.243557	-0.613399	107.117	2.02986	3.3092	0.087602	-1.05749	66.5491	1.82314	1.72403											0.15586	-0.807265	40.4692	1.60712	1.99083
0.119082	-0.924154	38.0185	1.58	1.70967	0.111492	-0.952758	80.1731	1.90403	1.99844	0.0804433	-1.09451	139.153	2.14349	1.9584	0.0716805	-1.1446	65.5543	1.8166	1.58711	0.196634	-0.706342	122.251	2.08725	2.95502	0.214211	-0.669159	39.5175	1.59679	2.38626	0.0472968	-1.32517	212.907	2.32819	1.7569											0.0526022	-1.279	425.156	2.62855	2.05517
0.0865951	-1.06251	78.5873	1.89535	1.78385	0.0790943	-1.10185	139.883	2.14576	1.94741	0.119802	-0.921537	79.4261	1.89996	2.06173	0.0573696	-1.24132	129.383	2.11188	1.70132	0.208168	-0.681586	92.6017	1.96662	2.88536	0.155252	-0.808962	162.334	2.21041	2.7324	0.08619	-1.06454	58.2023	1.76494	1.65793											0.07091	-1.14929	177.9	2.25018	1.95788
0.187145	-0.727821	16.5221	1.21807	1.67358	0.0505365	-1.2964	484.317	2.68513	2.07123	0.069678	-1.1569	196.863	2.29416	1.98302	0.0816214	-1.0882	65.0303	1.81312	1.66617	0.16374	-0.785845	114.093	2.05726	2.61789	0.21016	-0.67745	37.7706	1.57715	2.32807	0.085495	-1.06806	80.3986	1.90525	1.78384											0.0611419	-1.21366	224.008	2.35026	1.93651
0.135419	-0.868321	31.9395	1.50433	1.73246	0.0885349	-1.05289	98.6005	1.99388	1.89373	0.086133	-1.06483	150.76	2.17829	2.04566	0.140857	-0.85122	27.5572	1.44023	1.69196	0.179172	-0.746729	97.3985	1.98855	2.66302	0.158282	-0.800568	150.821	2.17846	2.72114	0.0912059	-1.03998	52.9207	1.72363	1.65737											0.134799	-0.870313	44.3681	1.64707	1.8925
0.0888899	-1.05115	46.5056	1.6675	1.58637	0.107842	-0.967212	113.508	2.05503	2.12469	0.106027	-0.974585	71.7929	1.85608	1.90448	0.0540138	-1.2675	126.49	2.10206	1.65843	0.156832	-0.804566	117.705	2.0708	2.5738	0.133985	-0.872945	154.416	2.18869	2.50725	0.0499692	-1.3013	202.793	2.30705	1.77289											0.181502	-0.741119	38.0654	1.58053	2.13262
0.148901	-0.827102	37.3848	1.57269	1.90145	0.0987468	-1.00548	100.242	2.00105	1.99015	0.0911282	-1.04035	96.278	1.98353	1.9066	0.0559758	-1.252	100.188	2.00082	1.5981	0.226795	-0.644367	44.1156	1.64459	2.55226	0.199412	-0.700248	57.1752	1.75721	2.50941	0.070179	-1.15379	68.115	1.83324	1.58888											0.075323	-1.12307	170.073	2.23064	1.98619
0.094679	-1.02375	49.5155	1.69474	1.65543	0.0612555	-1.21286	306.88	2.48697	2.05051	0.0799367	-1.09725	160.507	2.20549	2.01001	0.069891	-1.15558	70.7985	1.85002	1.60095	0.290944	-0.53619	48.7529	1.688	3.14814	0.211081	-0.675551	58.5575	1.76758	2.61651	0.0823765	-1.0842	66.7639	1.82454	1.68285											0.155575	-0.80806	37.3029	1.57174	1.94508
0.140202	-0.853247	33.5894	1.5262	1.7887	0.0637966	-1.1952	417.475	2.62063	2.19263	0.0739788	-1.13089	175.497	2.24427	1.98451	0.0912239	-1.03989	53.1453	1.72547	1.65927	0.144581	-0.83989	214.477	2.33138	2.77582	0.208179	-0.681563	35.5561	1.55091	2.27553	0.0527361	-1.27789	480.438	2.68164	2.09849											0.0840628	-1.0754	106.529	2.02747	1.88532
0.139629	-0.855023	24.2292	1.38434	1.61907	0.110351	-0.957225	122.201	2.08707	2.18034	0.0809459	-1.09181	119.874	2.07872	1.90393	0.0729249	-1.13712	80.0003	1.90309	1.6736	0.265042	-0.576685	49.8724	1.69786	2.94417	0.213563	-0.670473	33.4149	1.52394	2.27293	0.0508931	-1.29334	125.894	2.10001	1.62371											0.0543457	-1.26483	259.076	2.41343	1.9081
0.127931	-0.893024	36.8196	1.56608	1.75368	0.0772548	-1.11207	268.139	2.42836	2.18363	0.098293	-1.00748	83.4031	1.92118	1.90692	0.112717	-0.948011	33.5881	1.52619	1.60988	0.262915	-0.580184	21.9279	1.341	2.31133	0.193897	-0.712429	97.6021	1.98946	2.7925	0.0563009	-1.24948	103.972	2.01692	1.6142											0.126034	-0.899512	86.9484	1.93926	2.1559
0.153486	-0.81393	16.6719	1.22199	1.50134	0.0736189	-1.13301	200.464	2.30204	2.03179	0.117187	-0.931122	77.2992	1.88817	2.02785	0.150813	-0.82156	27.7244	1.44286	1.75625	0.189643	-0.722063	106.053	2.02552	2.80519	0.16143	-0.792015	68.2266	1.83395	2.31555	0.0644986	-1.19045	118.869	2.07507	1.7431											0.121763	-0.914486	73.1575	1.86426	2.03859
0.112723	-0.947989	56.252	1.75014	1.84616	0.10717	-0.969928	83.9238	1.92388	1.98353	0.0983204	-1.00736	87.0841	1.93994	1.92577	0.065532	-1.18355	101.41	2.00608	1.69497	0.187075	-0.727985	168.71	2.22714	3.05932	0.181484	-0.741163	56.8619	1.75482	2.36766	0.0595331	-1.22524	122.752	2.08903	1.70499											0.109909	-0.958967	59.0992	1.77158	1.84739
0.122405	-0.912202	36.9537	1.56766	1.71854	0.129426	-0.887979	48.2019	1.68306	1.89539	0.0774157	-1.11117	139.138	2.14345	1.929	0.0548404	-1.2609	117.119	2.06863	1.6406	0.267198	-0.573167	33.9527	1.53087	2.67091	0.32726	-0.485107	21.2042	1.32642	2.73429	0.0895546	-1.04791	71.1377	1.8521	1.76742											0.0819045	-1.08669	103.383	2.01445	1.85374
0.103646	-0.984448	56.4089	1.75135	1.77902	0.0714225	-1.14617	245.055	2.38926	2.08457	0.0859601	-1.0657	111.659	2.0479	1.92164	0.0620577	-1.2072	80.4815	1.9057	1.5786	0.156303	-0.806033	226.514	2.3551	2.92184	0.185547	-0.731547	171.091	2.23323	3.05275	0.0583229	-1.23416	129.892	2.11358	1.71257											0.170217	-0.768998	33.2075	1.52124	1.9782
0.150273	-0.823119	23.7969	1.37652	1.67232	0.0424481	-1.37214	550.352	2.74064	1.99734	0.0654091	-1.18436	192.975	2.2855	1.92973	0.05163	-1.2871	183.418	2.26344	1.75856	0.176434	-0.753417	100.19	2.00082	2.65567	0.238076	-0.623284	51.4122	1.71107	2.74525	0.0827608	-1.08218	46.92	1.67136	1.54444											0.155669	-0.807799	43.5276	1.63876	2.02868
0.177071	-0.751852	23.1509	1.36457	1.81494	0.100127	-0.999449	113.655	2.05559	2.05672	0.0809717	-1.09167	151.561	2.18059	1.99748	0.139344	-0.855912	23.1715	1.36495	1.59474	0.209843	-0.678105	66.1374	1.82045	2.68461	0.188045	-0.725738	32.6664	1.5141	2.08629	0.0632469	-1.19896	67.4194	1.82879	1.52531											0.13442	-0.871537	45.3477	1.65655	1.90073
0.0717978	-1.14389	88.3259	1.94609	1.70129	0.0789668	-1.10256	236.147	2.37318	2.15244	0.0657427	-1.18215	257.61	2.41096	2.03947	0.0529512	-1.27612	183.282	2.26312	1.77343	0.117377	-0.930416	249.289	2.3967	2.57595	0.204642	-0.689006	83.9941	1.92425	2.79279	0.0765438	-1.11609	76.2804	1.88241	1.68661											0.0405476	-1.39204	538.575	2.73125	1.96205
0.177191	-0.751558	16.5648	1.21919	1.62221	0.0842867	-1.07424	174.456	2.24169	2.08676	0.0777916	-1.10907	171.784	2.23498	2.01519	0.0558922	-1.25265	133.584	2.12575	1.69701	0.259582	-0.585725	73.6614	1.86724	3.18791	0.244744	-0.611288	29.2818	1.4666	2.39919	0.0613539	-1.21216	92.6397	1.9668	1.62256											0.122832	-0.910688	64.7108	1.81098	1.98858
0.132647	-0.877304	50.3188	1.70173	1.93973	0.101861	-0.991992	119.434	2.07713	2.0939	0.122863	-0.910578	72.6912	1.86148	2.04429	0.104998	-0.97882	44.6669	1.64999	1.68569	0.0935914	-1.02876	661.167	2.82031	2.74146	0.231744	-0.634992	67.9713	1.83233	2.88559	0.0633081	-1.19854	195.673	2.29153	1.91193											0.0834923	-1.07835	107.033	2.02952	1.88205
0.0966669	-1.01472	57.3925	1.75886	1.73334	0.0706335	-1.15099	176.59	2.24697	1.9522	0.110859	-0.955229	63.6579	1.80385	1.8884	0.0771178	-1.11285	72.3068	1.85918	1.67065	0.169179	-0.771653	166.865	2.22236	2.88001	0.204341	-0.689646	66.1182	1.82032	2.6395	0.0975399	-1.01082	55.3501	1.74312	1.72446											0.0681388	-1.16661	161.847	2.2091	1.89362
0.119881	-0.921251	45.8431	1.66127	1.80328	0.0932769	-1.03023	128.781	2.10985	2.04795	0.0838799	-1.07634	133.87	2.12668	1.97584	0.096201	-1.01682	56.2019	1.74975	1.72081	0.221114	-0.655383	60.9617	1.78506	2.72368	0.229426	-0.639357	21.2188	1.32672	2.07509	0.0365595	-1.437	323.454	2.50981	1.74656											0.307889	-0.511605	6.99615	0.844859	1.65139
0.132828	-0.876709	41.685	1.61998	1.8478	0.0746335	-1.12707	235.935	2.37279	2.10528	0.0829188	-1.08135	164.365	2.21581	2.04912	0.0712844	-1.14701	85.7879	1.93343	1.68563	0.153578	-0.813671	158.467	2.19994	2.70372	0.205539	-0.687107	81.1917	1.90951	2.77906	0.0763468	-1.11721	98.4711	1.99331	1.78419											0.0683126	-1.1655	126.348	2.10157	1.80315
0.178224	-0.749035	14.5216	1.16202	1.55135	0.10346	-0.985229	109.054	2.03764	2.06819	0.106623	-0.97215	88.9379	1.94909	2.00492	0.0665274	-1.177	104.662	2.01979	1.71605	0.185655	-0.731294	129.86	2.11348	2.89005	0.216102	-0.665341	64.7596	1.8113	2.72237	0.0989065	-1.00478	59.2462	1.77266	1.76424											0.0982511	-1.00766	111.478	2.04719	2.03162
0.204261	-0.689815	9.38953	0.972644	1.41001	0.13668	-0.864295	32.8595	1.51666	1.7548	0.0741719	-1.12976	167.474	2.22395	1.96851	0.0460008	-1.33723	211.086	2.32446	1.73826	0.257128	-0.589851	29.6261	1.47168	2.495	0.229154	-0.639872	38.1407	1.58139	2.47141	0.0516761	-1.28671	128.823	2.10999	1.63984											0.088174	-1.05466	90.4549	1.95643	1.85504
0.187205	-0.727682	15.007	1.17629	1.6165	0.0703736	-1.15259	182.321	2.26084	1.96153	0.0854175	-1.06845	132.21	2.12126	1.98536	0.0711994	-1.14752	71.4212	1.85383	1.6155	0.14634	-0.834638	182.476	2.2612	2.7092	0.270247	-0.568238	16.631	1.22092	2.1486	0.0778106	-1.10896	64.3148	1.80831	1.63063											0.0978931	-1.00925	90.8748	1.95844	1.9405
0.14421	-0.841006	21.4487	1.3314	1.58311	0.0792895	-1.10078	190.701	2.28035	2.07157	0.108253	-0.965559	86.554	1.93729	2.00639	0.0660012	-1.18045	94.6251	1.97601	1.67395	0.126488	-0.897951	233.525	2.36833	2.63748	0.162581	-0.788931	78.2234	1.89334	2.39988	0.0602636	-1.21995	154.314	2.18841	1.79386											0.0740729	-1.13034	127.693	2.10617	1.8633
0.122147	-0.913118	35.6311	1.55183	1.69948	0.0903898	-1.04388	150.033	2.17619	2.08471	0.0878268	-1.05637	117.298	2.06929	1.95886	0.112099	-0.950399	43.5467	1.63896	1.72449	0.174844	-0.757348	205.89	2.31363	3.05492	0.163262	-0.787115	136.321	2.13456	2.71188	0.0621629	-1.20647	104.907	2.0208	1.67497											0.0547125	-1.26191	253.692	2.40431	1.90529
0.149547	-0.825222	28.3921	1.4532	1.76098	0.104119	-0.982469	89.9154	1.95383	1.9887	0.0809041	-1.09203	157.291	2.1967	2.01158	0.129767	-0.886836	34.6555	1.53977	1.73625	0.195336	-0.709217	122.994	2.08989	2.94675	0.209055	-0.67974	108.607	2.03586	2.99505	0.0524645	-1.28013	181.129	2.25799	1.76387											0.108629	-0.964054	44.7972	1.65125	1.71282
0.116914	-0.932132	55.8959	1.74738	1.87461	0.0796773	-1.09867	159.107	2.20169	2.00397	0.0837387	-1.07707	137.211	2.13739	1.98444	0.0940603	-1.02659	50.0549	1.69945	1.65542	0.179808	-0.745191	103.197	2.01367	2.70221	0.180217	-0.744205	193.695	2.28712	3.07324	0.0527005	-1.27819	149.912	2.17584	1.70229											0.119563	-0.922402	91.0573	1.95931	2.12415
0.149997	-0.823919	39.5621	1.59728	1.93864	0.0520514	-1.28357	335.667	2.52591	1.96788	0.0785379	-1.10492	129.182	2.1112	1.91073	0.106881	-0.971099	35.4814	1.55	1.59613	0.211284	-0.675134	59.7361	1.77624	2.63094	0.159127	-0.798256	121.23	2.08361	2.6102	0.0578689	-1.23756	112.911	2.05274	1.6587											0.0858586	-1.06622	109.245	2.0384	1.91181
					0.0695772	-1.15753	338.868	2.53003	2.18571	0.094837	-1.02302	116.503	2.06634	2.01983	0.076476	-1.11647	88.1326	1.94514	1.74221	0.252281	-0.598115	62.2577	1.79419	2.99975	0.181663	-0.740733	54.3185	1.73495	2.3422	0.132416	-0.878059	39.7342	1.59916	1.82125											0.1197	-0.921904	67.5041	1.82933	1.9843
					0.0662864	-1.17858	247.498	2.39357	2.0309	0.0816893	-1.08783	127.321	2.1049	1.93495	0.107155	-0.969989	30.0143	1.47733	1.52304	0.162181	-0.789999	183.483	2.2636	2.86532	0.152366	-0.817113	178.853	2.2525	2.75665	0.100746	-0.996773	44.2101	1.64552	1.65085											0.0925154	-1.03379	126.968	2.1037	2.03494
					0.0526654	-1.27847	387.574	2.58835	2.02456	0.0775437	-1.11045	150.26	2.17684	1.96032	0.0532942	-1.27332	111.238	2.04625	1.60702	0.167099	-0.777025	150.608	2.17785	2.8028	0.124256	-0.905683	203.467	2.30849	2.5489	0.0573715	-1.2413	110.464	2.04322	1.64603											0.0613603	-1.21211	178.636	2.25197	1.85789
					0.0505499	-1.29628	450.609	2.6538	2.04724	0.0905579	-1.04307	119.292	2.07661	1.99086	0.0778025	-1.10901	68.3149	1.83452	1.6542	0.178215	-0.749056	140.439	2.14749	2.86693	0.244119	-0.612398	36.143	1.55802	2.54414	0.0635964	-1.19657	65.1588	1.81397	1.51598											0.14471	-0.839503	43.8501	1.64197	1.95588
					0.0511392	-1.29125	313.954	2.49687	1.93369	0.0769176	-1.11397	181.168	2.25808	2.02705	0.0896905	-1.04725	52.1548	1.71729	1.63981	0.172491	-0.763232	155.453	2.1916	2.87147	0.191857	-0.717023	157.156	2.19633	3.06312	0.0720195	-1.14255	143.676	2.15738	1.88822											0.125806	-0.900297	69.7725	1.84368	2.04786
					0.113414	-0.945335	102.76	2.01182	2.12816	0.0915479	-1.03835	108.132	2.03395	1.95883	0.0849452	-1.07086	65.8889	1.81881	1.69846	0.178645	-0.748009	195.502	2.29115	3.063	0.164964	-0.78261	83.51	1.92174	2.45555	0.111131	-0.954166	25.4301	1.40535	1.47286											0.11262	-0.948386	82.0076	1.91385	2.01801
					0.0771966	-1.1124	218.906	2.34026	2.10379	0.0908527	-1.04166	100.448	2.00194	1.92187	0.0841172	-1.07512	59.2994	1.77305	1.64917	0.211393	-0.67491	157.828	2.19818	3.257	0.158077	-0.801131	149.638	2.17504	2.71496	0.0425667	-1.37093	230.823	2.36328	1.72385											0.174306	-0.758689	24.3122	1.38583	1.82661
					0.0465606	-1.33198	610.541	2.78571	2.09141	0.0974462	-1.01124	88.8345	1.94858	1.92693	0.0648598	-1.18802	118.766	2.07469	1.74634	0.196183	-0.707338	66.5087	1.82288	2.5771	0.204469	-0.689373	36.7887	1.56572	2.27122	0.0798784	-1.09757	80.8332	1.90759	1.73801											0.0510922	-1.29164	333.742	2.52341	1.95364
					0.0481487	-1.31742	567.359	2.75386	2.09035	0.0712027	-1.1475	189.32	2.2772	1.98448	0.155769	-0.80752	34.591	1.53896	1.90579	0.257259	-0.58963	33.6587	1.5271	2.58993	0.144812	-0.839195	122.538	2.08827	2.48842	0.0362756	-1.44039	129.156	2.11111	1.46566											0.135759	-0.867232	63.545	1.80308	2.07912
					0.0949828	-1.02235	114.956	2.06053	2.01547	0.113317	-0.945704	73.9128	1.86872	1.97601	0.0874022	-1.05848	62.4631	1.79562	1.69642	0.13902	-0.856922	213.439	2.32927	2.71818	0.174986	-0.756997	59.8466	1.77704	2.34749	0.0705657	-1.15141	48.3331	1.68424	1.46277											0.0618274	-1.20882	164.028	2.21492	1.8323
					0.0561452	-1.25069	323.075	2.5093	2.00634	0.0689372	-1.16155	198.801	2.29842	1.97876	0.0724593	-1.13991	86.0161	1.93458	1.69714	0.279033	-0.554345	37.6516	1.57578	2.8426	0.190505	-0.720092	88.0488	1.94472	2.70066	0.050079	-1.30034	237.217	2.37515	1.82655											0.0958178	-1.01855	104.868	2.02064	1.98384
					0.114635	-0.940681	69.0246	1.839	1.95497	0.0817351	-1.08759	146.979	2.16726	1.99271	0.0789345	-1.10273	95.5815	1.98037	1.79588	0.182585	-0.738536	85.3609	1.93126	2.61498	0.1706	-0.768021	67.4438	1.82894	2.38137	0.0660182	-1.18034	112.576	2.05145	1.73802											0.140534	-0.852218	50.5524	1.70374	1.99919
					0.0764249	-1.11677	223.182	2.34866	2.10309	0.0682434	-1.16594	184.721	2.26652	1.94394	0.108209	-0.965737	49.8559	1.69772	1.75795	0.188394	-0.724934	70.4225	1.84771	2.5488	0.148497	-0.828282	212.154	2.32665	2.80901	0.0657557	-1.18207	115.362	2.06206	1.74446											0.0677995	-1.16877	184.948	2.26705	1.93968
					0.0751912	-1.12383	224.272	2.35077	2.09175	0.0729336	-1.13707	164.375	2.21584	1.94872	0.102724	-0.988328	43.1117	1.6346	1.6539	0.268801	-0.570568	29.5968	1.47124	2.57856	0.232813	-0.632993	59.2358	1.77258	2.80032	0.0573792	-1.24125	114.45	2.05862	1.65851											0.122324	-0.912489	33.9026	1.53023	1.67699
					0.114999	-0.939305	87.3673	1.94135	2.06679	0.070635	-1.15098	198.461	2.29768	1.99628	0.0738228	-1.13181	77.045	1.88674	1.66702	0.214478	-0.668617	44.1356	1.64479	2.45999	0.156899	-0.804381	126.784	2.10307	2.61452	0.0990911	-1.00397	51.8873	1.71506	1.70829											0.148824	-0.827328	55.8977	1.74739	2.11209
					0.119539	-0.922491	129.775	2.11319	2.29075	0.0712176	-1.14741	212.44	2.32724	2.02825	0.0750824	-1.12446	69.648	1.84291	1.63893	0.159498	-0.797245	112.516	2.05121	2.57288	0.176287	-0.75378	91.0655	1.95935	2.59937	0.0643292	-1.19159	100.115	2.0005	1.67885											0.0829962	-1.08094	116.681	2.067	1.91222
					0.0830023	-1.08091	140.075	2.14636	1.9857	0.099707	-1.00127	91.6901	1.96232	1.95983	0.0925978	-1.0334	50.8278	1.7061	1.65096	0.179655	-0.745562	137.966	2.13977	2.87001	0.255595	-0.592447	78.5752	1.89529	3.19908	0.0503791	-1.29775	105.382	2.02277	1.55867											0.0778223	-1.1089	117.712	2.07082	1.86746
					0.0580805	-1.23597	368.055	2.56591	2.07603	0.0871967	-1.0595	139.774	2.14543	2.02494	0.0669058	-1.17454	77.5515	1.88959	1.6088	0.172391	-0.763486	139.673	2.14511	2.80963	0.183639	-0.736035	64.5362	1.8098	2.45886	0.0362965	-1.44014	267.984	2.42811	1.68603											0.0890538	-1.05035	78.5542	1.89517	1.80433
					0.0840196	-1.07562	116.931	2.06793	1.92255	0.0688312	-1.16221	213.588	2.32958	2.00443	0.0858825	-1.0661	72.6931	1.86149	1.74608	0.156196	-0.806331	149.578	2.17487	2.69724	0.228325	-0.641446	94.8906	1.97722	3.08245	0.109485	-0.960645	35.4631	1.54978	1.61327											0.293546	-0.532324	12.0625	1.08144	2.03154
					0.0902986	-1.04432	146.093	2.16463	2.07277	0.0809548	-1.09176	136.976	2.13665	1.95707	0.100836	-0.996386	44.8031	1.65131	1.6573	0.16055	-0.79439	130.37	2.11518	2.66265	0.236211	-0.626701	18.0976	1.25762	2.00673	0.101514	-0.993475	22.9684	1.36113	1.37007											0.0653574	-1.18471	234.326	2.36982	2.00035
					0.107919	-0.966901	76.7858	1.88528	1.94982	0.0687482	-1.16274	224.829	2.35185	2.02268	0.0648945	-1.18779	124.745	2.09602	1.76464	0.164469	-0.783917	104.451	2.01891	2.57542	0.278866	-0.554605	26.6908	1.42636	2.57185	0.0806308	-1.0935	74.2599	1.87075	1.7108											0.0418857	-1.37793	459.503	2.66229	1.93209
					0.0567474	-1.24605	380.591	2.58046	2.0709	0.0890479	-1.05038	124.581	2.09545	1.99495	0.0674801	-1.17082	96.6668	1.98528	1.69562	0.301268	-0.521047	39.1051	1.59223	3.05583	0.161642	-0.791445	151.078	2.1792	2.75344	0.0882903	-1.05409	41.0172	1.61297	1.5302											0.112305	-0.949602	63.1739	1.80054	1.8961
					0.0702167	-1.15356	218.502	2.33946	2.02803	0.0938834	-1.02741	122.289	2.08739	2.0317	0.0580247	-1.23639	127.342	2.10497	1.70252	0.14048	-0.852385	272.065	2.43467	2.85631	0.149536	-0.825255	126.191	2.10103	2.54591	0.0479238	-1.31945	119.342	2.07679	1.57398											0.185532	-0.731582	42.1811	1.62512	2.22138
					0.0482263	-1.31672	516.331	2.71293	2.06038	0.110096	-0.958228	79.0914	1.89813	1.98087	0.0441332	-1.35523	200.845	2.30286	1.69923	0.153295	-0.814472	224.561	2.35133	2.88694	0.184617	-0.733729	79.7259	1.9016	2.59169	0.0572885	-1.24193	129.458	2.11213	1.70068											0.157686	-0.802207	24.6313	1.39149	1.73457
					0.0624867	-1.20421	355.517	2.55086	2.11828	0.0883577	-1.05376	128.506	2.10892	2.00134	0.063813	-1.19509	123.452	2.0915	1.75007	0.142385	-0.846536	117.284	2.06924	2.44436	0.209987	-0.677807	32.3525	1.50991	2.22764	0.0729929	-1.13672	78.7358	1.89617	1.66811											0.0719895	-1.14273	214.718	2.33187	2.04061
					0.063703	-1.19584	304.862	2.4841	2.07729	0.140229	-0.853161	49.1684	1.69169	1.98284	0.0586396	-1.23181	110.992	2.04529	1.6604	0.134892	-0.870013	296.335	2.47178	2.84109	0.169667	-0.770402	107.645	2.03199	2.63758	0.0782855	-1.10632	78.5244	1.895	1.71289											0.0440056	-1.35649	538.686	2.73134	2.01353
					0.0816798	-1.08789	117.202	2.06894	1.9018	0.0811876	-1.09051	147.348	2.16834	1.98838	0.103228	-0.986201	45.3553	1.65663	1.67981	0.141692	-0.848654	150.441	2.17737	2.56567	0.168483	-0.773445	53.1095	1.72517	2.2305	0.0672216	-1.17249	57.0134	1.75598	1.49765											0.124385	-0.905231	52.0143	1.71612	1.89579
					0.07271	-1.13841	322.166	2.50808	2.20315	0.102562	-0.989013	131.829	2.12001	2.14356	0.0872247	-1.05936	69.3033	1.84075	1.73761	0.142752	-0.845419	251.624	2.40075	2.83972	0.108062	-0.966327	285.324	2.45534	2.5409	0.0445687	-1.35097	227.964	2.35787	1.74531											0.07898	-1.10248	83.9592	1.92407	1.74521
					0.0595376	-1.22521	267.237	2.4269	1.9808	0.0853142	-1.06898	113.932	2.05665	1.92394	0.114549	-0.941009	32.1774	1.50755	1.60206	0.138218	-0.859436	266.429	2.42558	2.82229	0.148774	-0.827472	67.1906	1.82731	2.2083	0.0595128	-1.22539	196.708	2.29382	1.87191											0.141404	-0.849537	57.5498	1.76004	2.07177
					0.0964696	-1.01561	181.48	2.25883	2.22411	0.0780177	-1.10781	147.426	2.16857	1.95754	0.0860875	-1.06506	54.8347	1.73906	1.63282	0.209058	-0.679732	158.353	2.19963	3.23602	0.257211	-0.589711	48.0519	1.68171	2.85176	0.0865434	-1.06277	73.6765	1.86733	1.75705											0.12945	-0.887897	62.1403	1.79337	2.0198
					0.0699641	-1.15512	209.416	2.32101	2.00932	0.081001	-1.09151	119.709	2.07813	1.9039	0.102359	-0.989876	50.0594	1.69949	1.71687	0.225114	-0.647598	75.4374	1.87759	2.89931	0.182882	-0.737828	79.2533	1.89902	2.57379	0.0355471	-1.4492	314.878	2.49814	1.72381											0.0701407	-1.15403	131.986	2.12053	1.8375
					0.0949675	-1.02242	118.761	2.07467	2.02917	0.0701208	-1.15415	206.809	2.31557	2.00629	0.0717442	-1.14421	114.428	2.05853	1.79908	0.0889156	-1.05102	726.99	2.86153	2.72261	0.245888	-0.609263	32.9318	1.51762	2.4909	0.0811545	-1.09069	45.4455	1.65749	1.51968											0.0777608	-1.10924	123.673	2.09228	1.88623
					0.0519325	-1.28456	259.525	2.41418	1.87938	0.0589126	-1.22979	230.773	2.36319	1.92161	0.0734652	-1.13392	107.45	2.03121	1.79132	0.185141	-0.732497	115.63	2.06307	2.81649	0.186834	-0.728543	81.7452	1.91246	2.62505	0.0441636	-1.35494	222.306	2.34695	1.73215											0.10818	-0.965855	58.2392	1.76522	1.82762
					0.0863803	-1.06359	212.015	2.32637	2.18729	0.0778908	-1.10851	177.204	2.24847	2.02837	0.0646183	-1.18964	96.6065	1.98501	1.66857	0.144747	-0.839391	155.028	2.19041	2.60952	0.211199	-0.675307	38.4575	1.58498	2.34705	0.117956	-0.928279	29.2946	1.46679	1.58012											0.111725	-0.951848	105.522	2.02334	2.1257
					0.0830353	-1.08074	139.08	2.14326	1.98315	0.0711096	-1.14807	169.268	2.22858	1.94115	0.13106	-0.88253	31.4339	1.4974	1.69671	0.203398	-0.691653	108.252	2.03444	2.94141	0.177607	-0.75054	81.1248	1.90915	2.54371	0.0678851	-1.16823	80.2425	1.9044	1.63017											0.186237	-0.729935	25.5828	1.40795	1.92887
					0.0497544	-1.30317	426.626	2.63005	2.01819	0.0761706	-1.11821	210.027	2.32228	2.07677	0.101267	-0.994534	47.0637	1.67269	1.68188	0.165773	-0.780486	149.164	2.17366	2.78501	0.213243	-0.671126	37.6001	1.57519	2.34708	0.0956843	-1.01916	19.0158	1.27912	1.25507											0.101337	-0.994232	94.3392	1.97469	1.98615
					0.075903	-1.11974	156.426	2.19431	1.95966	0.0792981	-1.10074	169.703	2.22969	2.02563	0.11686	-0.932335	36.3297	1.56026	1.6735	0.187503	-0.726993	85.2197	1.93054	2.65552	0.222747	-0.652189	21.8061	1.33858	2.05244	0.0901418	-1.04507	38.4077	1.58442	1.51608											0.101311	-0.994344	60.6994	1.78318	1.79333
					0.0536023	-1.27082	327.067	2.51464	1.97876	0.0841784	-1.0748	127.951	2.10705	1.96041	0.105637	-0.976183	45.5317	1.65831	1.69877	0.15652	-0.805429	126.912	2.1035	2.61165	0.167209	-0.776739	85.6626	1.93279	2.48834	0.0951077	-1.02178	48.6123	1.68675	1.65079											0.0681252	-1.16669	159.058	2.20155	1.88701
					0.09094	-1.04125	118.875	2.07509	1.99289	0.0842247	-1.07456	128.448	2.10873	1.96241	0.0654506	-1.18409	131.202	2.11794	1.78867	0.173743	-0.760092	101.421	2.00613	2.63932	0.252488	-0.597759	23.6588	1.37399	2.29857	0.0573871	-1.24119	97.0821	1.98714	1.601											0.0811728	-1.09059	174.071	2.24073	2.0546
					0.066407	-1.17779	269.146	2.42999	2.06318	0.0761589	-1.11828	134.313	2.12812	1.90303	0.0720058	-1.14263	68.743	1.83723	1.60789	0.2383	-0.622875	79.3875	1.89975	3.04997	0.177489	-0.750829	125.729	2.09944	2.79616	0.0499582	-1.30139	158.489	2.2	1.6905											0.162136	-0.790121	37.4923	1.57394	1.99203
					0.0539088	-1.26834	374.827	2.57383	2.02929	0.0868239	-1.06136	129.629	2.1127	1.99056	0.0914686	-1.03873	57.2224	1.75757	1.69204	0.231126	-0.636152	100.943	2.00408	3.15031	0.201909	-0.694843	22.6139	1.35437	1.94918	0.0634488	-1.19758	125.2	2.09761	1.75154											0.0447826	-1.34889	377.529	2.57695	1.91042
					0.0675259	-1.17053	281.244	2.44908	2.09229	0.110475	-0.956738	105.058	2.02143	2.11284	0.117174	-0.93117	35.2373	1.547	1.66135	0.204215	-0.689911	80.4596	1.90558	2.76206	0.163003	-0.787805	123.749	2.09254	2.65617	0.119755	-0.921705	25.5363	1.40716	1.52669											0.104947	-0.97903	86.2669	1.93584	1.97731
					0.123948	-0.90676	48.4833	1.68559	1.85892	0.0951575	-1.02156	106.38	2.02686	1.98409	0.0829615	-1.08112	49.9709	1.69872	1.57125	0.244604	-0.611537	75.7469	1.87937	3.07318	0.232145	-0.634241	17.5548	1.2444	1.96202	0.0625143	-1.20402	142.092	2.15257	1.78782											0.163315	-0.786975	33.0546	1.51923	1.93047
					0.0758804	-1.11987	209.376	2.32093	2.0725	0.102464	-0.98943	83.6533	1.92248	1.94302	0.0775447	-1.11045	69.603	1.84263	1.65936	0.166019	-0.779842	217.702	2.33786	2.99787	0.16057	-0.794334	87.5468	1.94224	2.44512	0.07374	-1.1323	66.4503	1.8225	1.60956											0.0556218	-1.25476	217.715	2.33789	1.86322
					0.0677091	-1.16935	282.664	2.45127	2.09626	0.0835286	-1.07816	132.86	2.12339	1.96945	0.10432	-0.981631	55.9785	1.74802	1.78073	0.194791	-0.710431	99.2051	1.99653	2.81031	0.164973	-0.782588	66.5444	1.82311	2.32959	0.0521519	-1.28273	242.513	2.38473	1.85911											0.0787219	-1.1039	103.676	2.01568	1.82595
					0.0525363	-1.27954	554.926	2.74424	2.1447	0.0632603	-1.19887	198.179	2.29706	1.91602	0.0604131	-1.21887	84.1924	1.92527	1.57956	0.11724	-0.930925	437.41	2.64089	2.83684	0.204379	-0.689563	39.9339	1.60134	2.32225	0.163655	-0.78607	52.2355	1.71797	2.18551											0.136918	-0.86354	33.8304	1.52931	1.77097
					0.0742284	-1.12943	209.176	2.32051	2.05459	0.0815565	-1.08854	151.487	2.18037	2.00302	0.141558	-0.849066	27.9967	1.44711	1.70435	0.120332	-0.91962	313.927	2.49683	2.71506	0.142099	-0.847408	136.399	2.13481	2.51923	0.0547961	-1.26125	122.374	2.08769	1.65525											0.325306	-0.487708	7.7085	0.88697	1.81865
					0.0728742	-1.13743	204.206	2.31007	2.03096	0.0796033	-1.09907	165.138	2.21785	2.01793	0.124671	-0.904234	22.3256	1.3488	1.49165	0.167835	-0.775119	185.011	2.2672	2.92497	0.228632	-0.640863	29.7534	1.47354	2.2993	0.0612506	-1.21289	228.946	2.35973	1.94555											0.0919205	-1.03659	104.249	2.01807	1.94684
					0.0491738	-1.30827	504.157	2.70257	2.06576	0.103457	-0.985239	69.1173	1.83959	1.86715	0.0636191	-1.19641	105.846	2.02468	1.69229	0.209668	-0.678467	100.39	2.00169	2.95031	0.164634	-0.783481	195.352	2.29082	2.9239	0.0774325	-1.11108	66.2808	1.82139	1.6393											0.0853146	-1.06898	70.1556	1.84606	1.72694
					0.103966	-0.98311	126.212	2.1011	2.1372	0.114265	-0.942088	57.7469	1.76153	1.86981	0.0634659	-1.19746	115.273	2.06173	1.72175	0.150728	-0.821806	150.391	2.17722	2.64931	0.184422	-0.734187	92.433	1.96583	2.67756	0.0847674	-1.07177	52.4842	1.72003	1.60485											0.0522169	-1.28219	388.249	2.58911	2.01929
					0.111866	-0.951302	61.805	1.79102	1.88271	0.0914877	-1.03864	107.244	2.03037	1.95484	0.0725835	-1.13916	90.9391	1.95875	1.71947	0.184404	-0.734229	93.5961	1.97126	2.6848	0.143632	-0.84275	123.18	2.09054	2.48062	0.0831345	-1.08022	62.9241	1.79882	1.66523											0.0695777	-1.15753	159.899	2.20384	1.90392
					0.0868917	-1.06102	129.522	2.11234	1.99086	0.0841015	-1.0752	155.924	2.19291	2.03955	0.0699923	-1.15495	76.5803	1.88412	1.63134	0.176322	-0.753693	131.092	2.11758	2.8096	0.181195	-0.741854	128.025	2.1073	2.84058	0.0681913	-1.16627	93.7933	1.97217	1.69101											0.0925215	-1.03376	94.9538	1.97751	1.91294
					0.0486805	-1.31265	628.404	2.79824	2.13176	0.118052	-0.927928	67.0795	1.82659	1.96846	0.0744547	-1.12811	72.3787	1.85961	1.64843	0.202698	-0.69315	88.544	1.94716	2.80914	0.209062	-0.679724	63.4951	1.80274	2.65216	0.067482	-1.17081	71.5715	1.85474	1.58415											0.168193	-0.774193	33.118	1.52006	1.96342
					0.0849038	-1.07107	158.091	2.19891	2.05299	0.0738239	-1.1318	160.836	2.20638	1.94944	0.0981026	-1.00832	54.9289	1.7398	1.72545	0.134727	-0.870544	406.837	2.60942	2.99746	0.167647	-0.775604	70.2406	1.84659	2.38084	0.0949672	-1.02243	52.0563	1.71647	1.67882											0.0976278	-1.01043	116.627	2.0668	2.04547
					0.0567508	-1.24603	464.188	2.66669	2.14016	0.0765414	-1.1161	165.199	2.21801	1.98728	0.104985	-0.978872	48.1886	1.68294	1.71927	0.202207	-0.694203	72.3805	1.85962	2.67879	0.202391	-0.693809	93.1402	1.96914	2.83816	0.0622659	-1.20575	78.9294	1.89724	1.57349											0.101981	-0.99148	71.9789	1.85721	1.87316
					0.0866397	-1.06228	228.901	2.35965	2.2213	0.105694	-0.975952	87.0598	1.93982	1.98762	0.10387	-0.983508	43.9026	1.64249	1.67003	0.142993	-0.844685	199.79	2.30057	2.72359	0.202706	-0.693133	52.7603	1.72231	2.48481	0.0878994	-1.05601	54.1577	1.73366	1.6417											0.0767821	-1.11474	241.822	2.3835	2.13816
					0.120476	-0.919099	73.1056	1.86395	2.02802	0.0922569	-1.035	101.753	2.00755	1.93966	0.13422	-0.872183	37.2366	1.57097	1.80119	0.27261	-0.564458	52.1154	1.71697	3.0418	0.238249	-0.62297	72.6421	1.86119	2.98761	0.108864	-0.963116	67.3859	1.82857	1.8986											0.0661239	-1.17964	211.835	2.326	1.97178
					0.0817871	-1.08732	136.004	2.13355	1.96222	0.106586	-0.972301	81.7556	1.91252	1.967	0.0836576	-1.07749	71.7347	1.85573	1.72226	0.158422	-0.800184	210.352	2.32295	2.90302	0.196595	-0.706429	58.2786	1.76551	2.4992	0.0387115	-1.41216	172.898	2.23779	1.58466											0.0703897	-1.15249	187.868	2.27385	1.97299
					0.0474868	-1.32343	470.315	2.67239	2.01929	0.0913152	-1.03946	104.737	2.0201	1.94342	0.0835741	-1.07793	50.9416	1.70707	1.58366	0.143786	-0.842283	207.167	2.31632	2.75005	0.160544	-0.794407	166.542	2.22152	2.79645	0.0467969	-1.32978	245.575	2.39018	1.79743											0.134579	-0.871024	41.457	1.6176	1.85712
					0.0921693	-1.03541	101.352	2.00583	1.93723	0.0806922	-1.09317	140.173	2.14666	1.96371	0.110785	-0.955519	53.9373	1.73189	1.81251	0.204723	-0.688834	137.466	2.1382	3.10408	0.188977	-0.723591	55.7268	1.74606	2.41305	0.0576981	-1.23884	158.987	2.20136	1.77696											0.149043	-0.826689	66.1072	1.82025	2.20185
					0.103627	-0.984529	132.017	2.12063	2.15395	0.083472	-1.07846	137.053	2.13689	1.98143	0.110141	-0.958051	31.0073	1.49146	1.55677	0.203907	-0.690568	64.9748	1.81275	2.62501	0.17935	-0.746299	46.0036	1.66279	2.22805	0.0496696	-1.30391	113.717	2.05583	1.57666											0.0641248	-1.19297	134.747	2.12952	1.78505
					0.0543278	-1.26498	392.746	2.59411	2.05072	0.0992609	-1.00322	139.395	2.14425	2.13736	0.110231	-0.957696	38.5171	1.58565	1.6557	0.18384	-0.73556	82.9402	1.91876	2.60858	0.191914	-0.716893	114.106	2.05731	2.86975	0.0582019	-1.23506	126.444	2.1019	1.70185											0.0798466	-1.09774	156.141	2.19352	1.9982
					0.115109	-0.938893	76.7327	1.88498	2.00766						0.0766728	-1.11536	57.2397	1.7577	1.5759	0.199764	-0.699482	55.3959	1.74348	2.49253	0.146434	-0.834359	175.45	2.24415	2.68967	0.0741987	-1.1296	113.1	2.05346	1.81786											0.136959	-0.863408	52.4079	1.7194	1.99141
					0.0959145	-1.01812	138.876	2.14263	2.1045						0.0891366	-1.04994	54.9357	1.73986	1.65709	0.192215	-0.716213	85.9818	1.93441	2.70088	0.168334	-0.773829	77.6811	1.89032	2.44281	0.102396	-0.989718	32.627	1.51358	1.5293											0.083554	-1.07803	87.6232	1.94262	1.802
					0.0968933	-1.01371	94.0652	1.97343	1.94675						0.0813237	-1.08978	54.6113	1.73728	1.59415	0.134697	-0.870642	306.542	2.48649	2.85592	0.207784	-0.682389	53.9203	1.73175	2.53778	0.0766703	-1.11537	59.5857	1.77514	1.59152											0.0515649	-1.28765	237.486	2.37564	1.84495
					0.0693324	-1.15906	327.267	2.5149	2.16977						0.101622	-0.993011	47.0105	1.67219	1.68396	0.206581	-0.68491	69.0827	1.83937	2.68556	0.287226	-0.541776	36.0886	1.55737	2.87456	0.0642479	-1.19214	199.036	2.29893	1.92841											0.0951024	-1.02181	95.3073	1.97913	1.93689
					0.0756075	-1.12144	265.477	2.42403	2.16154						0.0411692	-1.38543	154.927	2.19013	1.58083	0.29256	-0.533785	24.7666	1.39387	2.61129	0.156827	-0.80458	75.6243	1.87866	2.33496	0.0760211	-1.11907	70.2091	1.84639	1.64994											0.0488065	-1.31152	317.632	2.50192	1.90765
					0.0696493	-1.15708	283.7	2.45286	2.11986						0.0861639	-1.06467	73.8907	1.86859	1.75508	0.203905	-0.690572	94.2329	1.9742	2.85879	0.194487	-0.711108	54.5582	1.73686	2.44247	0.117453	-0.930136	31.9511	1.50449	1.61749											0.106268	-0.973596	85.5743	1.93234	1.98475
					0.0923128	-1.03474	107.84	2.03278	1.96454						0.0686436	-1.1634	136.452	2.13498	1.83512	0.145473	-0.837217	191.927	2.28314	2.72705	0.147258	-0.831923	94.9544	1.97751	2.37704	0.0502905	-1.29851	312.369	2.49467	1.92117											0.0629113	-1.20127	266.628	2.42591	2.01945
					0.0689862	-1.16124	306.602	2.48658	2.14131						0.075225	-1.12364	74.6168	1.87284	1.66676	0.176852	-0.752391	188.332	2.27492	3.0236	0.142291	-0.846822	90.114	1.95479	2.30839	0.0607005	-1.21681	109.918	2.04107	1.6774											0.0609948	-1.21471	323.204	2.50948	2.06591
					0.0911866	-1.04007	133.125	2.12426	2.04242						0.0757532	-1.1206	50.2759	1.70136	1.51826	0.170414	-0.768495	91.4638	1.96125	2.55206	0.155516	-0.808226	66.506	1.82286	2.25539	0.0852259	-1.06943	44.1825	1.64525	1.53844											0.0645825	-1.18989	158.411	2.19978	1.84874
					0.0717772	-1.14401	260.339	2.41554	2.11146											0.310423	-0.508046	19.2582	1.28462	2.52855	0.140123	-0.853492	104.128	2.01757	2.3639	0.0535642	-1.27113	271.021	2.433	1.91405											0.058258	-1.23464	200.958	2.3031	1.8654
					0.0929035	-1.03197	190.713	2.28038	2.20974											0.222647	-0.652382	56.537	1.75233	2.68605	0.197388	-0.70468	54.1006	1.7332	2.45956	0.0450676	-1.34614	166.568	2.22159	1.65035											0.083648	-1.07754	133.078	2.12411	1.97125
					0.0748883	-1.12559	184.739	2.26656	2.01367											0.162346	-0.789557	154.237	2.18819	2.77141	0.195578	-0.708681	51.7511	1.71392	2.41846	0.126925	-0.896454	19.0014	1.27878	1.42649											0.0669701	-1.17412	248.534	2.39539	2.04016
					0.0732128	-1.13541	173.397	2.23904	1.97201											0.174839	-0.757362	105.727	2.02418	2.67268	0.19136	-0.71815	141.409	2.15048	2.99447	0.0375444	-1.42546	278.717	2.44516	1.71536											0.09871	-1.00564	90.906	1.95859	1.94761
					0.0701218	-1.15415	334.284	2.52412	2.187											0.136696	-0.864244	196.88	2.2942	2.65458	0.197944	-0.703457	103.724	2.01588	2.86568	0.0395305	-1.40307	200.89	2.30296	1.64137											0.109965	-0.958745	69.5911	1.84255	1.92184
					0.0516102	-1.28726	584.782	2.76699	2.14952											0.192819	-0.71485	78.9544	1.89738	2.65423	0.163494	-0.786499	222.607	2.34754	2.9848	0.0475759	-1.32261	131.041	2.11741	1.60093											0.230885	-0.636603	16.8482	1.22655	1.92671
																				0.141861	-0.848137	373.699	2.57252	3.03315	0.192211	-0.716221	67.9339	1.83209	2.55799	0.110646	-0.956065	49.6002	1.69548	1.7734											0.0716332	-1.14489	145.917	2.1641	1.89024
																				0.156631	-0.805122	244.272	2.38787	2.96585	0.225251	-0.647334	56.1154	1.74908	2.70198	0.0655214	-1.18362	96.3947	1.98405	1.67626											0.0920419	-1.03601	100.252	2.00109	1.93153
																				0.239312	-0.621036	72.63	1.86112	2.99679	0.193886	-0.712454	53.3668	1.72727	2.4244	0.0861573	-1.06471	105.931	2.02502	1.90195											0.0690654	-1.16074	203.578	2.30873	1.98902
																				0.18668	-0.728902	207.181	2.31635	3.17786	0.161459	-0.791937	149.319	2.17411	2.74531	0.0869845	-1.06056	78.716	1.89606	1.7878											0.122529	-0.911762	57.8348	1.76219	1.93273
																				0.148396	-0.828579	171.82	2.23507	2.69748	0.202094	-0.694446	45.988	1.66264	2.3942	0.0807245	-1.09299	67.8843	1.83177	1.67592											0.0560173	-1.25168	235.163	2.37137	1.89455
																				0.260154	-0.58477	57.8235	1.7621	3.01333	0.118478	-0.926363	252.516	2.40229	2.59325	0.0383324	-1.41643	299.009	2.47568	1.74783											0.0638258	-1.195	256.255	2.40867	2.01562
																				0.193885	-0.712456	144.378	2.1595	3.03106	0.162244	-0.789831	103.597	2.01535	2.55162	0.0711483	-1.14784	66.445	1.82246	1.58774											0.229937	-0.638391	13.0874	1.11685	1.74948
																				0.191725	-0.71732	171.048	2.23312	3.11314	0.200206	-0.698523	42.2061	1.62538	2.32687	0.0754705	-1.12222	82.2149	1.91495	1.70639											0.0716105	-1.14502	101.741	2.0075	1.75324
																				0.168318	-0.77387	153.594	2.18638	2.82525	0.147336	-0.831692	121.435	2.08434	2.50615	0.0624482	-1.20448	114.806	2.05996	1.71025											0.137079	-0.863029	28.3933	1.45322	1.68386
																									0.180417	-0.743723	122.638	2.08863	2.80834	0.0632926	-1.19865	150.264	2.17685	1.81609											0.046838	-1.3294	296.732	2.47236	1.85976
																									0.135444	-0.86824	169.193	2.22838	2.56655	0.0466322	-1.33131	133.406	2.12518	1.5963											0.0681555	-1.1665	250.101	2.39812	2.05582
																									0.248728	-0.604276	37.1553	1.57002	2.59819	0.0739496	-1.13106	103.31	2.01414	1.78075											0.122081	-0.913352	45.3911	1.65697	1.81416
																									0.191337	-0.718201	74.0773	1.86969	2.60329																0.0593076	-1.22689	245.151	2.38943	1.94755
																									0.181448	-0.741247	87.4056	1.94154	2.61929																0.122585	-0.911563	48.2368	1.68338	1.84669
																																													0.051098	-1.2916	353.609	2.54852	1.97316
																																													0.138683	-0.857976	65.6577	1.81729	2.11811
																																													0.141839	-0.848206	43.2965	1.63645	1.92931
																																													0.112879	-0.947388	51.2479	1.70968	1.80462
																																													0.0824481	-1.08382	103.826	2.01631	1.86037
																																													0.0624935	-1.20417	184.159	2.26519	1.88113
																																													0.081883	-1.08681	94.8167	1.97688	1.81899
																																													0.106964	-0.970763	88.0395	1.94468	2.00325
																																													0.125944	-0.899822	63.0556	1.79972	2.00009
																																													0.0875845	-1.05757	107.199	2.03019	1.91967
																																													0.183358	-0.736699	35.5893	1.55132	2.10577
																																													0.133096	-0.875836	80.8235	1.90754	2.17796
																																													0.090867	-1.04159	88.8711	1.94876	1.87094
																																													0.110524	-0.956543	87.1745	1.94039	2.02854
																																													0.113511	-0.944963	96.6184	1.98506	2.10067
																																													0.0760089	-1.11914	156.287	2.19392	1.96037
																																													0.13118	-0.882133	42.8568	1.63202	1.85008


[truncated: 5 more columns]

## Sheet: Fig 2 Data and Graphs
Winsauer et al (1952)	Archie (1942)	Core plugs
1.781	1.715	1.713
2.135	2.051	2.05
2.204	1.974	1.973	1
1.599	1.666	1.669		1
2.504	2.818	2.831
2.417	2.552	2.556
1.741	1.691	1.69
1.657	1.669	1.7
2.875	2.766	2.759
1.916	1.932	1.933
1.855	1.954	1.957

## Sheet: Figs 3 & 4 Data and Graphs
			factor	m	const	a	R2			R2
	288	A	-1.7814	1.7814	-0.058	0.874984	0.824	-1.7151	1.7151	0.8229	0.133674	3.86566
	365	B	-2.1348	2.1348	-0.0926	0.807979	0.8723	-2.0514	2.0514	0.8709	0.160753	4.06552
	350	C	-2.2037	2.2037	-0.0538	0.883487	0.8853	-1.9736	1.9736	0.8847	0.0678196	11.6589
	359	D	-1.5988	1.5988	0.0744	1.18686	0.8684	-1.6665	1.6665	0.8668	0.184587	-4.06241
	374	E	-2.5038	2.5038	0.2366	1.72425	0.827	-2.8184	2.8184	0.8136	1.647	-11.1624
	379	F	-2.4171	2.4171	0.1001	1.25922	0.6299	-2.5516	2.5516	0.6279	0.318522	-5.2712
	377	G	-1.7413	1.7413	-0.0595	0.871967	0.7213	-1.6912	1.6912	0.7207	0.0832524	2.96239
	88	H	-1.6566	1.6566	0.0527	1.12902	0.7598	-1.6694	1.6694	0.7593	0.0658501	-0.766743
	188	I	-2.8753	2.8753	-0.0759	0.839653	0.8584	-2.7665	2.7665	0.8572	0.139991	3.93277
	396	J	-1.9165	1.9165	0.0163	1.03825	0.9166	-1.9322	1.9322	0.9165	0.0109111	-0.812545
	398	K	-1.8546	1.8546	0.1069	1.27909	0.3972	-1.9535	1.9535	0.396	0.30303	-5.06271
	3562
				2.06217		1.08134	0.7782		2.07176	0.776045	0.283217	-0.0593389
				0.404078		0.275326	0.151412		0.437271	0.151223	0.462269	6.22392

## Sheet: Fig 5 Data and Graph
Real Porosity	Positive									Negative
	0	0.5	1	1.5	1.8	2	2.5	3		0	0.5	1	1.5	1.8	2	2.5	3
0	1	1	1	1	1	1	1	1	0	1	1	1	1	1	1	1	1
0.5	1	0.997509	0.995025	0.992547	0.991063	0.990075	0.987609	0.985149	-0.5	1	1.00251	1.00503	1.00755	1.00906	1.01008	1.01261	1.01515
1	1	0.995037	0.990099	0.985185	0.982249	0.980296	0.975431	0.97059	-1	1	1.00504	1.0101	1.01519	1.01826	1.0203	1.02544	1.03061
1.5	1	0.992583	0.985222	0.977915	0.973556	0.970662	0.963463	0.956317	-1.5	1	1.00759	1.01523	1.02293	1.02758	1.03069	1.03851	1.04638
2	1	0.990148	0.980392	0.970733	0.964983	0.961169	0.951699	0.942322	-2	1	1.01015	1.02041	1.03077	1.03703	1.04123	1.0518	1.06248
2.5	1	0.98773	0.97561	0.963639	0.956527	0.951814	0.940135	0.928599	-2.5	1	1.01274	1.02564	1.03871	1.04663	1.05194	1.06534	1.07891
3	1	0.985329	0.970874	0.95663	0.948185	0.942596	0.928767	0.915142	-3	1	1.01535	1.03093	1.04675	1.05636	1.06281	1.07912	1.09568
3.5	1	0.982946	0.966184	0.949707	0.939956	0.933511	0.917591	0.901943	-3.5	1	1.01797	1.03627	1.05489	1.06623	1.07385	1.09315	1.1128
4	1	0.980581	0.961538	0.942866	0.931837	0.924556	0.906602	0.888996	-4	1	1.02062	1.04167	1.06315	1.07625	1.08507	1.10744	1.13028
4.5	1	0.978232	0.956938	0.936107	0.923827	0.91573	0.895796	0.876297	-4.5	1	1.02329	1.04712	1.07151	1.08641	1.09646	1.122	1.14813
5	1	0.9759	0.952381	0.929429	0.915924	0.907029	0.88517	0.863838	-5	1	1.02598	1.05263	1.07998	1.09672	1.10803	1.13682	1.16635
5.5	1	0.973585	0.947867	0.922829	0.908125	0.898452	0.87472	0.851614	-5.5	1	1.02869	1.0582	1.08856	1.10719	1.11979	1.15192	1.18496
6	1	0.971286	0.943396	0.916307	0.900429	0.889996	0.864441	0.839619	-6	1	1.03142	1.06383	1.09726	1.11781	1.13173	1.16729	1.20397
6.5	1	0.969003	0.938967	0.909862	0.892834	0.881659	0.854331	0.827849	-6.5	1	1.03418	1.06952	1.10607	1.1286	1.14387	1.18296	1.22339
7	1	0.966736	0.934579	0.903492	0.885338	0.873439	0.844385	0.816298	-7	1	1.03695	1.07527	1.115	1.13954	1.1562	1.19893	1.24323
7.5	1	0.964486	0.930233	0.897196	0.87794	0.865333	0.834601	0.804961	-7.5	1	1.03975	1.08108	1.12405	1.15065	1.16874	1.21519	1.2635
8	1	0.96225	0.925926	0.890973	0.870637	0.857339	0.824975	0.793832	-8	1	1.04257	1.08696	1.13323	1.16194	1.18147	1.23177	1.28421
8.5	1	0.960031	0.921659	0.884821	0.863429	0.849455	0.815503	0.782908	-8.5	1	1.04542	1.0929	1.14253	1.17339	1.19442	1.24867	1.30538
9	1	0.957826	0.917431	0.87874	0.856313	0.84168	0.806183	0.772183	-9	1	1.04828	1.0989	1.15196	1.18502	1.20758	1.26589	1.32701
9.5	1	0.955637	0.913242	0.872728	0.849287	0.834011	0.797012	0.761654	-9.5	1	1.05118	1.10497	1.16152	1.19683	1.22096	1.28345	1.34913
10	1	0.953463	0.909091	0.866784	0.842351	0.826446	0.787986	0.751315	-10	1	1.05409	1.11111	1.17121	1.20883	1.23457	1.30135	1.37174
10.5	1	0.951303	0.904977	0.860908	0.835503	0.818984	0.779102	0.741162	-10.5	1	1.05703	1.11732	1.18104	1.22101	1.2484	1.3196	1.39486
11	1	0.949158	0.900901	0.855097	0.828741	0.811622	0.770358	0.731191	-11	1	1.06	1.1236	1.19101	1.23338	1.26247	1.33821	1.4185
11.5	1	0.947027	0.896861	0.849352	0.822063	0.80436	0.761751	0.721399	-11.5	1	1.06299	1.12994	1.20112	1.24595	1.27677	1.35719	1.44268
12	1	0.944911	0.892857	0.843671	0.815469	0.797194	0.753277	0.71178	-12	1	1.066	1.13636	1.21137	1.25873	1.29132	1.37655	1.46741
12.5	1	0.942809	0.888889	0.838052	0.808957	0.790123	0.744936	0.702332	-12.5	1	1.06904	1.14286	1.22177	1.2717	1.30612	1.3963	1.49271
13	1	0.940721	0.884956	0.832496	0.802525	0.783147	0.736722	0.69305	-13	1	1.07211	1.14943	1.23231	1.28489	1.32118	1.41645	1.5186
13.5	1	0.938647	0.881057	0.827001	0.796173	0.776262	0.728636	0.683931	-13.5	1	1.07521	1.15607	1.24301	1.29829	1.3365	1.43701	1.54508
14	1	0.936586	0.877193	0.821567	0.789898	0.769468	0.720672	0.674972	-14	1	1.07833	1.16279	1.25387	1.31191	1.35208	1.45799	1.57219
14.5	1	0.934539	0.873362	0.816191	0.783701	0.762762	0.712831	0.666168	-14.5	1	1.08148	1.16959	1.26488	1.32575	1.36794	1.4794	1.59993
15	1	0.932505	0.869565	0.810874	0.777578	0.756144	0.705108	0.657516	-15	1	1.08465	1.17647	1.27606	1.33982	1.38408	1.50125	1.62833
15.5	1	0.930484	0.865801	0.805614	0.771529	0.749611	0.697501	0.649014	-15.5	1	1.08786	1.18343	1.2874	1.35412	1.40051	1.52356	1.65741
16	1	0.928477	0.862069	0.800411	0.765554	0.743163	0.690009	0.640658	-16	1	1.09109	1.19048	1.29892	1.36867	1.41723	1.54633	1.68718
16.5	1	0.926482	0.858369	0.795264	0.75965	0.736798	0.68263	0.632444	-16.5	1	1.09435	1.1976	1.3106	1.38345	1.43426	1.56958	1.71767
17	1	0.9245	0.854701	0.790171	0.753816	0.730514	0.67536	0.624371	-17	1	1.09764	1.20482	1.32246	1.39849	1.45159	1.59333	1.7489
17.5	1	0.922531	0.851064	0.785133	0.748052	0.72431	0.668198	0.616434	-17.5	1	1.10096	1.21212	1.3345	1.41378	1.46924	1.61758	1.78089
18	1	0.920575	0.847458	0.780148	0.742356	0.718184	0.661142	0.608631	-18	1	1.10432	1.21951	1.34673	1.42934	1.48721	1.64235	1.81367
18.5	1	0.91863	0.843882	0.775216	0.736728	0.712137	0.65419	0.600959	-18.5	1	1.1077	1.22699	1.35914	1.44516	1.50551	1.66765	1.84726
19	1	0.916698	0.840336	0.770335	0.731165	0.706165	0.64734	0.593416	-19	1	1.11111	1.23457	1.37174	1.46126	1.52416	1.69351	1.88168
19.5	1	0.914779	0.83682	0.765505	0.725668	0.700268	0.64059	0.585998	-19.5	1	1.11456	1.24224	1.38454	1.47764	1.54315	1.71993	1.91696
20	1	0.912871	0.833333	0.760726	0.720234	0.694444	0.633938	0.578704	-20	1	1.11803	1.25	1.39754	1.4943	1.5625	1.74693	1.95312
20.5	1	0.910975	0.829876	0.755996	0.714864	0.688693	0.627382	0.57153	-20.5	1	1.12154	1.25786	1.41075	1.51126	1.58222	1.77453	1.99021
21	1	0.909091	0.826446	0.751315	0.709555	0.683013	0.620921	0.564474	-21	1	1.12509	1.26582	1.42416	1.52852	1.60231	1.80274	2.02824
21.5	1	0.907218	0.823045	0.746682	0.704308	0.677404	0.614553	0.557534	-21.5	1	1.12867	1.27389	1.43779	1.54609	1.62278	1.83158	2.06724
22	1	0.905357	0.819672	0.742096	0.699121	0.671862	0.608276	0.550707	-22	1	1.13228	1.28205	1.45164	1.56397	1.64366	1.86107	2.10725
22.5	1	0.903508	0.816327	0.737557	0.693993	0.666389	0.602088	0.543991	-22.5	1	1.13592	1.29032	1.46571	1.58218	1.66493	1.89124	2.1483
23	1	0.90167	0.813008	0.733065	0.688923	0.660982	0.595988	0.537384	-23	1	1.13961	1.2987	1.48001	1.60072	1.68663	1.92209	2.19042
23.5	1	0.899843	0.809717	0.728617	0.683911	0.655641	0.589974	0.530883	-23.5	1	1.14332	1.30719	1.49454	1.61961	1.70874	1.95365	2.23365
24	1	0.898027	0.806452	0.724215	0.678955	0.650364	0.584044	0.524487	-24	1	1.14708	1.31579	1.50931	1.63884	1.7313	1.98594	2.27803
24.5	1	0.896221	0.803213	0.719857	0.674055	0.645151	0.578198	0.518193	-24.5	1	1.15087	1.3245	1.52433	1.65842	1.75431	2.01898	2.32359
25	1	0.894427	0.8	0.715542	0.669209	0.64	0.572433	0.512	-25	1	1.1547	1.33333	1.5396	1.67838	1.77778	2.0528	2.37037

## Sheet: Fig 6 Data and Graphs
B1	25	degrees C				B2	25	degrees C				B3	25	degrees C
Bulk salinity	Bulk condy	Real Salinity	Fluid Condy	% between used		Bulk salinity	Bulk condy	Real Salinity	Fluid Condy	% between used		Bulk salinity	Bulk condy	Real Salinity	Fluid Condy	% between used
(mol/L)	S/m	(mol/L)	S/m	and ideal		(mol/L)	S/m	(mol/L)	S/m	and ideal		(mol/L)	S/m	(mol/L)	S/m	and ideal
1e-05	0.00012241	0.000124	0.00151311	-91.9101		1e-06	1.22514e-05	1.67e-05	0.00020435	-94.0047		1.1e-06	1.34763e-05	1.67e-05	0.00020435	-93.4053
3e-05	0.000366894	0.000147	0.00179307	-79.5383		5e-06	6.12272e-05	2.35e-05	0.000287472	-78.7015		5.2e-06	6.36752e-05	2.35e-05	0.000287472	-77.8499
0.0001	0.0012208	0.0001385	0.00168963	-27.7475		3e-05	0.000366894	5.85e-05	0.000714831	-48.674		2.5e-05	0.000305803	5.85e-05	0.000714831	-57.2203
0.0003	0.00365184	0.000556	0.00675141	-45.9099		6e-05	0.000733132	9.5e-05	0.00115988	-36.7922		5e-05	0.000611106	9.5e-05	0.00115988	-47.3129
0.001	0.0121044	0.00106	0.0128259	-5.62561		0.00025	0.00304501	0.000303	0.00368824	-17.4398		0.0002	0.00243762	0.000303	0.00368824	-33.9084
0.003	0.0359835	0.00321366	0.0385171	-6.57801		0.0003	0.00365184	0.000365	0.00443995	-17.7504		0.00025	0.00304501	0.000365	0.00443995	-31.4178
0.01	0.117829	0.0109	0.128211	-8.09787		0.0007	0.00849033	0.0008185	0.00991921	-14.4051		0.00057	0.0069206	0.0008185	0.00991921	-30.2303
0.03	0.343462	0.0309	0.353408	-2.81426		0.0015	0.0181058	0.0017	0.0204997	-11.6777		0.0013	0.0157082	0.0017	0.0204997	-23.3733
0.0623	0.692192	0.0623	0.692192	0		0.0017	0.0204997	0.00195084	0.0234972	-12.757		0.0015	0.0181058	0.00195084	0.0234972	-22.945
0.1	1.08242	0.101	1.09257	-0.928889		0.0045	0.0537142	0.00511961	0.0610027	-11.9478		0.0043	0.0513574	0.00511961	0.0610027	-15.8113
0.3	2.96576	0.296	2.93042	1.20596		0.009	0.10626	0.00950411	0.112096	-5.20646		0.0085	0.100462	0.00950411	0.112096	-10.3786
1	8.27355	0.97	8.07357	2.47699		0.009	0.10626	0.00996141	0.117383	-9.47565		0.0085	0.100462	0.00996141	0.117383	-14.4148
2	14.0143	1.94	13.7124	2.20135		0.022	0.254346	0.022935	0.264831	-3.95913		0.02	0.231851	0.022935	0.264831	-12.453
						0.07	0.77319	0.0721038	0.795196	-2.76735		0.07	0.77319	0.0721038	0.795196	-2.76735
						0.12	1.28363	0.120856	1.29216	-0.660197		0.123	1.31351	0.120856	1.29216	1.65178
						0.3	2.96576	0.291713	2.89245	2.53434		0.305	3.00982	0.291713	2.89245	4.05774
						1	8.27355	0.962994	8.02658	3.07692		1.01	8.33977	0.962994	8.02658	3.90197
						2	14.0143	1.93956	13.7102	2.21796		2.03	14.1635	1.93956	13.7102	3.30619

## Sheet: Fig 7 Data and Graphs
Conductivity as a function of SALINITY									Conductivity as a function of TEMPERATURE
Temperature=	0	10	20	25	30	40	50			0.000557645	0.00552587	0.0536894	0.490101	3.65601
Salinity	Conductivity								Temperature	Conductivity
(mol/L)	(S/m)								(degC)	(S/m)
										0.0001	0.001	0.01	0.1	1
1e-06	5.59764e-06	8.28165e-06	1.09357e-05	1.22514e-05	1.35597e-05	1.61537e-05	1.87177e-05		0	0.000557645	0.00552587	0.0536894	0.490101	3.65601
2e-06	1.11933e-05	1.65605e-05	2.18677e-05	2.44988e-05	2.71149e-05	3.23021e-05	3.74293e-05		5	0.000691776	0.00685657	0.0666673	0.610064	4.59452
3e-06	1.67877e-05	2.48376e-05	3.27975e-05	3.67436e-05	4.06673e-05	4.84472e-05	5.6137e-05		10	0.000825157	0.00817978	0.0795702	0.729278	5.52553
4e-06	2.23811e-05	3.31132e-05	4.37253e-05	4.89863e-05	5.42174e-05	6.45895e-05	7.48415e-05		15	0.000957788	0.00949548	0.0923981	0.847742	6.44903
5e-06	2.79736e-05	4.13876e-05	5.46515e-05	6.12272e-05	6.77654e-05	8.07294e-05	9.35433e-05		20	0.00108967	0.0108037	0.105151	0.965456	7.36504
6e-06	3.35653e-05	4.96608e-05	6.55762e-05	7.34665e-05	8.13117e-05	9.68672e-05	0.000112243		25	0.0012208	0.0121044	0.117829	1.08242	8.27355
7e-06	3.91563e-05	5.7933e-05	7.64997e-05	8.57043e-05	9.48563e-05	0.000113003	0.00013094		30	0.00135118	0.0133976	0.130432	1.19863	9.17456
8e-06	4.47466e-05	6.62042e-05	8.74219e-05	9.79407e-05	0.000108399	0.000129137	0.000149635		35	0.00148081	0.0146833	0.14296	1.3141	10.0681
9e-06	5.03363e-05	7.44746e-05	9.83429e-05	0.000110176	0.000121941	0.000145269	0.000168328		40	0.00160969	0.0159615	0.155412	1.42881	10.9541
1e-05	5.59254e-05	8.27441e-05	0.000109263	0.00012241	0.000135482	0.0001614	0.000187019		45	0.00173782	0.0172322	0.16779	1.54278	11.8326
1.7e-05	9.50347e-05	0.00014061	0.000185676	0.000208018	0.000230232	0.000274277	0.000317813		50	0.00186521	0.0184954	0.180093	1.65599	12.7036
2e-05	0.000111789	0.000165401	0.000218412	0.000244693	0.000270824	0.000322635	0.000373847		55	0.00199184	0.0197511	0.192321	1.76845	13.5671
3e-05	0.000167613	0.000248	0.000327488	0.000366894	0.000406075	0.000483763	0.00056055		60	0.00211772	0.0209993	0.204474	1.88017	14.4231
4e-05	0.000223404	0.000330554	0.000436504	0.000489028	0.000541253	0.000644803	0.000747153		65	0.00224285	0.02224	0.216552	1.99113	15.2716
5e-05	0.000279167	0.000413067	0.000545468	0.000611106	0.000676368	0.000805769	0.000933669		70	0.00236723	0.0234732	0.228555	2.10134	16.1126
6e-05	0.000334905	0.000495546	0.000654386	0.000733132	0.000811427	0.000966668	0.00112011		75	0.00249086	0.0246989	0.240483	2.21081	16.9461
7e-05	0.00039062	0.000577992	0.000763263	0.000855111	0.000946434	0.00112751	0.00130648		80	0.00261374	0.0259171	0.252335	2.31952	17.7721
8e-05	0.000446315	0.000660408	0.0008721	0.000977047	0.00108139	0.00128829	0.00149278		85	0.00273587	0.0271278	0.264113	2.42749	18.5906
9e-05	0.000501989	0.000742796	0.000980902	0.00109894	0.00121631	0.00144901	0.00167902		90	0.00285725	0.028331	0.275816	2.5347	19.4016
0.0001	0.000557645	0.000825157	0.00108967	0.0012208	0.00135118	0.00160969	0.00186521		95	0.00297789	0.0295267	0.287444	2.64116	20.2051
0.0002	0.00111335	0.00164755	0.00217576	0.00243762	0.00269797	0.00321418	0.00372439		100	0.00309777	0.0307149	0.298997	2.74688	21.0012
0.0003	0.00166778	0.00246816	0.00325953	0.00365184	0.00404191	0.00481528	0.00557966		NORMALISED TO 20degC
0.0004	0.0022212	0.00328731	0.00434143	0.00486398	0.00538354	0.00641366	0.00743177		0	0.511756	0.511481	0.510594	0.507636	0.496401
0.0005	0.00277374	0.00410522	0.00542171	0.00607433	0.00672319	0.00800968	0.00928116		5	0.63485	0.634652	0.634015	0.631892	0.623828
0.0006	0.0033255	0.00492202	0.00650055	0.00728306	0.00806107	0.0096036	0.0111281		10	0.757255	0.757129	0.756724	0.755372	0.750237
0.0007	0.00387654	0.00573781	0.00757807	0.00849033	0.00939734	0.0111956	0.0129729		15	0.878971	0.878911	0.878718	0.878074	0.875628
0.0008	0.00442692	0.00655265	0.00865439	0.00969625	0.0107321	0.0127859	0.0148156		20	1	1	1	1	1
0.0009	0.00497669	0.00736663	0.00972957	0.0109009	0.0120655	0.0143744	0.0166564		25	1.12034	1.12039	1.12057	1.12115	1.12335
0.001	0.00552587	0.00817978	0.0108037	0.0121044	0.0133976	0.0159615	0.0184954		30	1.23999	1.24009	1.24042	1.24152	1.24569
0.002	0.0109909	0.0162732	0.0214955	0.0240841	0.0266578	0.0317601	0.0368024		35	1.35896	1.3591	1.35957	1.36112	1.36701
0.003	0.0164167	0.0243109	0.0321151	0.0359835	0.0398293	0.0474535	0.0549878		40	1.47723	1.47741	1.47799	1.47993	1.48731
0.004	0.0218109	0.0323038	0.0426767	0.0478182	0.0529296	0.0630625	0.0730754		45	1.59482	1.59503	1.59571	1.59798	1.60659
0.005	0.0271781	0.0402583	0.0531885	0.0595973	0.0659687	0.0785989	0.0910791		50	1.71172	1.71195	1.71271	1.71524	1.72485
0.006	0.0325211	0.0481784	0.0636558	0.071327	0.0789532	0.0940706	0.109008		55	1.82793	1.82818	1.829	1.83173	1.84209
0.007	0.0378421	0.0560675	0.0740829	0.0830119	0.0918883	0.109484	0.126869		60	1.94345	1.94372	1.94458	1.94744	1.95832
0.008	0.043143	0.063928	0.0844729	0.0946553	0.104778	0.124843	0.144668		65	2.05828	2.05856	2.05944	2.06237	2.07353
0.009	0.0484251	0.0717616	0.0948282	0.10626	0.117625	0.140151	0.162408		70	2.17243	2.1727	2.17359	2.17653	2.18772
0.01	0.0536894	0.0795702	0.105151	0.117829	0.130432	0.155412	0.180093		75	2.28589	2.28616	2.28702	2.28991	2.30089
0.02	0.105521	0.156503	0.206885	0.231851	0.256667	0.305849	0.354432		80	2.39866	2.39891	2.39974	2.40251	2.41304
0.03	0.156175	0.231765	0.306455	0.343462	0.380244	0.453134	0.525124		85	2.51074	2.51098	2.51175	2.51434	2.52417
0.04	0.205895	0.3057	0.404305	0.453158	0.50171	0.597915	0.69292		90	2.62213	2.62235	2.62305	2.62539	2.63429
0.05	0.254819	0.378506	0.500693	0.561224	0.62138	0.740567	0.858254		95	2.73283	2.73302	2.73363	2.73566	2.74339
0.06	0.303043	0.450318	0.595792	0.667855	0.739467	0.881342	1.02142		100	2.84285	2.843	2.8435	2.84516	2.85146
0.07	0.350634	0.521232	0.689729	0.77319	0.856127	1.02042	1.18262
0.08	0.397647	0.591324	0.782602	0.877341	0.971479	1.15796	1.34203
0.09	0.444124	0.660657	0.874489	0.980393	1.08562	1.29405	1.49979
0.1	0.490101	0.729278	0.965456	1.08242	1.19863	1.42881	1.65599
0.2	0.927352	1.38354	1.83372	2.05657	2.27791	2.7161	3.14828
0.3	1.3329	1.99279	2.64368	2.96576	3.28558	3.91847	4.54236
0.4	1.71414	2.56754	3.40894	3.82515	4.23835	5.05575	5.86116
0.5	2.07528	3.11377	4.13725	4.64337	5.14574	6.13922	7.11771
0.6	2.41913	3.63545	4.83376	5.42617	6.01408	7.17639	8.3207
0.7	2.74773	4.13547	5.50221	6.17771	6.84795	8.17269	9.47644
0.8	3.06262	4.61604	6.14546	6.90117	7.65088	9.1323	10.5897
0.9	3.36504	5.07891	6.76578	7.59909	8.42565	10.0585	11.6644
1	3.65601	5.52553	7.36504	8.27355	9.17456	10.9541	12.7036
2	6.07573	9.29614	12.4566	14.0143	15.557	18.5974	21.5778
